# Supplementary material for: A feature-based analysis identifies COL1A2 as a regulator in pancreatic cancer
Source: PubMed Central journal article supplement — J Enzyme Inhib Med Chem. 2019 Jan 7;34(1):420–8. doi: 10.1080/14756366.2018.1484734 (PMC6327995; doi:10.1080/14756366.2018.1484734), 2019-01-07
Supplement: IENZ_A_1484734_SM0368.pdf [file IENZ_A_1484734_SM0368.pdf]

Supplementary Table S1

| GeneName | Database |
|----------|----------|
| PLA2G2A  | OMIM     |
| EPHB2    | OMIM     |
| MUTYH    | OMIM     |
| RAD54L   | OMIM     |
| BCAR3    | OMIM     |
| AMY2B    | OMIM     |
| AMY2A    | OMIM     |
| NRAS     | OMIM     |
| FALEC    | OMIM     |
| FASLG    | OMIM     |
| RNASEL   | OMIM     |
| BLACAT1  | OMIM     |
| PCAP     | OMIM     |
| FH       | OMIM     |
| SDCCAG8  | OMIM     |
| GACAT3   | OMIM     |
| EPCAM    | OMIM     |
| MSH2     | OMIM     |
| MSH6     | OMIM     |
| EHBP1    | OMIM     |
| REGL     | OMIM     |
| REG1A    | OMIM     |
| C2orf40  | OMIM     |
| BUB1     | OMIM     |
| LCO      | OMIM     |
| IL1B     | OMIM     |
| IL1RN    | OMIM     |
| SCHLAP1  | OMIM     |
| DIRC1    | OMIM     |
| CASP10   | OMIM     |
| CASP8    | OMIM     |
| BARD1    | OMIM     |
| HPC5     | OMIM     |
| OVCAS1   | OMIM     |
| ST11     | OMIM     |
| TGFBR2   | OMIM     |
| SCLC1    | OMIM     |
| MLH1     | OMIM     |
| DLEC1    | OMIM     |
| CTNNB1   | OMIM     |
| RASSF1   | OMIM     |
| NPHP3    | OMIM     |

|        |      |
|--------|------|
| ATR    | OMIM |
| PIK3CA | OMIM |
| EIF4G1 | OMIM |
| LNCR5  | OMIM |
| FGFR3  | OMIM |
| PCAT4  | OMIM |
| ADH1B  | OMIM |
| TLR2   | OMIM |
| PALLD  | OMIM |
| KMHN1  | OMIM |
| LNCR3  | OMIM |
| DAB2   | OMIM |
| APC    | OMIM |
| MCC    | OMIM |
| IRF1   | OMIM |
| SPINK1 | OMIM |
| HMMR   | OMIM |
| FGFR4  | OMIM |
| NQO2   | OMIM |
| CTAG3  | OMIM |
| HULC   | OMIM |
| CASC15 | OMIM |
| LNCR4  | OMIM |
| PBCA   | OMIM |
| CLPS   | OMIM |
| LNCR1  | OMIM |
| PBOV1  | OMIM |
| ESR1   | OMIM |
| MAD1L1 | OMIM |
| PMS2   | OMIM |
| MACC1  | OMIM |
| HPC4   | OMIM |
| EGFR   | OMIM |
| VOPP1  | OMIM |
| HIP1   | OMIM |
| PTPN12 | OMIM |
| GAEC1  | OMIM |
| CPA2   | OMIM |
| BRAF   | OMIM |
| MNX1   | OMIM |
| DLC1   | OMIM |
| MSR1   | OMIM |
| PDGFRL | OMIM |
| DBC1   | OMIM |

|          |      |
|----------|------|
| C8orf4   | OMIM |
| RB1CC1   | OMIM |
| RAD54B   | OMIM |
| CRCS6    | OMIM |
| CRCS2    | OMIM |
| HPC10    | OMIM |
| PCAT1    | OMIM |
| PRNCR1   | OMIM |
| CDKN2A   | OMIM |
| PCA3     | OMIM |
| FOXE1    | OMIM |
| GALNT12  | OMIM |
| 1-Dec    | OMIM |
| KLF6     | OMIM |
| CRCS5    | OMIM |
| PTF1A    | OMIM |
| GAD2     | OMIM |
| MAP3K8   | OMIM |
| MSMB     | OMIM |
| PPYR1    | OMIM |
| ERCC6    | OMIM |
| SNCG     | OMIM |
| PTEN     | OMIM |
| MXI1     | OMIM |
| HABP2    | OMIM |
| PNLIP    | OMIM |
| PNLIPRP1 | OMIM |
| PNLIPRP2 | OMIM |
| CASC2    | OMIM |
| FGFR2    | OMIM |
| HRAS     | OMIM |
| SLC22A1L | OMIM |
| TSG101   | OMIM |
| CD82     | OMIM |
| PTPRJ    | OMIM |
| HPC14    | OMIM |
| BRMS1    | OMIM |
| CCND1    | OMIM |
| ORAOV1   | OMIM |
| CTTN     | OMIM |
| GCRG224  | OMIM |
| ATM      | OMIM |
| BRCATA   | OMIM |
| CRCS7    | OMIM |

|         |      |
|---------|------|
| TSG11   | OMIM |
| COLCA1  | OMIM |
| COLCA2  | OMIM |
| PPP2R1B | OMIM |
| HEPN1   | OMIM |
| OPCML   | OMIM |
| CASC1   | OMIM |
| KRAS    | OMIM |
| ACVR1B  | OMIM |
| SRGAP1  | OMIM |
| ALDH2   | OMIM |
| PLA2G1B | OMIM |
| CDK2AP1 | OMIM |
| POLE1   | OMIM |
| PDX1    | OMIM |
| BRCA2   | OMIM |
| RB1     | OMIM |
| BRCA3   | OMIM |
| RNASE1  | OMIM |
| NKX2-1  | OMIM |
| CRCS8   | OMIM |
| MLH3    | OMIM |
| XRCC3   | OMIM |
| AKT1    | OMIM |
| HPC7    | OMIM |
| BUB1B   | OMIM |
| RAD51A  | OMIM |
| HMPS1   | OMIM |
| PCAT29  | OMIM |
| CHRNA5  | OMIM |
| CHRNA3  | OMIM |
| IQGAP1  | OMIM |
| BCAR4   | OMIM |
| PALB2   | OMIM |
| CRCS9   | OMIM |
| CDH1    | OMIM |
| NQO1    | OMIM |
| ZFHX3   | OMIM |
| BCAR1   | OMIM |
| BCPR    | OMIM |
| DPH1    | OMIM |
| OVCA2   | OMIM |
| HIC1    | OMIM |
| TP53    | OMIM |

|          |          |
|----------|----------|
| ELAC2    | OMIM     |
| FLCN     | OMIM     |
| PPY2     | OMIM     |
| NEK8     | OMIM     |
| HPC11    | OMIM     |
| RAD51D   | OMIM     |
| ERBB2    | OMIM     |
| HPC9     | OMIM     |
| BRCA1    | OMIM     |
| PPY      | OMIM     |
| PHB      | OMIM     |
| MPO      | OMIM     |
| RNF43    | OMIM     |
| RAD51C   | OMIM     |
| PTRH2    | OMIM     |
| PPM1D    | OMIM     |
| BRIP1    | OMIM     |
| AXIN2    | OMIM     |
| C17orf28 | OMIM     |
| RHBDF2   | OMIM     |
| GACAT2   | OMIM     |
| GATA6    | OMIM     |
| RBBP8    | OMIM     |
| SMAD7    | OMIM     |
| SMAD4    | OMIM     |
| DCC      | OMIM     |
| MIR1290  | DisGeNET |
| KLF10    | DisGeNET |
| ANXA8    | DisGeNET |
| MAPK1    | DisGeNET |
| PIK3CG   | DisGeNET |
| PIK3CD   | DisGeNET |
| PIK3CB   | DisGeNET |
| GPC1     | DisGeNET |
| ANXA8L1  | DisGeNET |

---

Supplementary Table S2

| Order | Term                           | Name                                                                 |
|-------|--------------------------------|----------------------------------------------------------------------|
| 1     | GO:0042476                     | odontogenesis                                                        |
| 2     | GO:0009368                     | endopeptidase Clp complex                                            |
| 3     | GO:0071786                     | endoplasmic reticulum tubular network organization                   |
| 4     | GO:0014043                     | negative regulation of neuron maturation                             |
| 5     | GO:0000439                     | core TFIIH complex                                                   |
| 6     | GO:0034101                     | erythrocyte homeostasis                                              |
| 7     | GO:0048668                     | collateral sprouting                                                 |
| 8     | GO:0048149                     | behavioral response to ethanol                                       |
| 9     | GO:0060670                     | branching involved in labyrinthine layer morphogenesis               |
| 10    | GO:0070436                     | Grb2-EGFR complex                                                    |
| 11    | KEGG:Type_II_diabetes_mellitus |                                                                      |
| 12    | GO:0005765                     | lysosomal membrane                                                   |
| 13    | KEGG:Regulation_of_autophagy   |                                                                      |
| 14    | GO:0031902                     | late endosome membrane                                               |
| 15    | GO:0060136                     | embryonic process involved in female pregnancy                       |
| 16    | GO:0008373                     | sialyltransferase activity                                           |
| 17    | GO:0001547                     | antral ovarian follicle growth                                       |
| 18    | GO:1902336                     | positive regulation of retinal ganglion cell axon guidance           |
| 19    | GO:0042022                     | interleukin-12 receptor complex                                      |
| 20    | GO:0005849                     | mRNA cleavage factor complex                                         |
| 21    | GO:0060100                     | positive regulation of phagocytosis, engulfment                      |
| 22    | GO:0035881                     | amacrine cell differentiation                                        |
| 23    | GO:0031665                     | negative regulation of lipopolysaccharide-mediated signaling pathway |
| 24    | GO:0048485                     | sympathetic nervous system development                               |
| 25    | GO:0001931                     | uropod                                                               |
| 26    | GO:0008046                     | axon guidance receptor activity                                      |
| 27    | GO:0005497                     | androgen binding                                                     |
| 28    | GO:0032729                     | positive regulation of interferon-gamma production                   |
| 29    | GO:2000377                     | regulation of reactive oxygen species metabolic process              |
| 30    | GO:0005977                     | glycogen metabolic process                                           |
| 31    | GO:0033630                     | positive regulation of cell adhesion mediated by integrin            |
| 32    | GO:0007292                     | female gamete generation                                             |
| 33    | GO:0050658                     | RNA transport                                                        |
| 34    | GO:0048609                     | multicellular organismal reproductive process                        |

|    |                                                  |                                                                               |
|----|--------------------------------------------------|-------------------------------------------------------------------------------|
| 35 | GO:0070742                                       | C2H2 zinc finger domain binding                                               |
| 36 | GO:0000012                                       | single strand break repair                                                    |
| 37 | GO:0035605                                       | peptidyl-cysteine S-nitrosylase activity                                      |
| 38 | GO:0042613                                       | MHC class II protein complex                                                  |
| 39 | GO:0001849                                       | complement component C1q binding                                              |
| 40 | GO:0001556                                       | oocyte maturation                                                             |
| 41 | GO:0031668                                       | cellular response to extracellular stimulus                                   |
| 42 | GO:0031223                                       | auditory behavior                                                             |
| 43 | GO:0032302                                       | MutSbeta complex                                                              |
| 44 | GO:0034113                                       | heterotypic cell-cell adhesion                                                |
| 45 | GO:0005112                                       | Notch binding                                                                 |
| 46 | GO:0051276                                       | chromosome organization                                                       |
| 47 | GO:0034063                                       | stress granule assembly                                                       |
| 48 | GO:0061198                                       | fungiform papilla formation                                                   |
| 49 | GO:0060736                                       | prostate gland growth                                                         |
| 50 | GO:0048703                                       | embryonic viscerocranium morphogenesis                                        |
| 51 | GO:0048843                                       | negative regulation of axon extension involved<br>in axon guidance            |
| 52 | GO:0000075                                       | cell cycle checkpoint                                                         |
| 53 | GO:0032481                                       | positive regulation of type I interferon<br>production                        |
| 54 | GO:0016331                                       | morphogenesis of embryonic epithelium                                         |
| 55 | GO:0048408                                       | epidermal growth factor binding                                               |
| 56 | KEGG:Circadian_rhythm                            |                                                                               |
| 57 | GO:1902204                                       | positive regulation of hepatocyte growth factor<br>receptor signaling pathway |
| 58 | KEGG:Neuroactive_ligand_receptor_inte<br>raction |                                                                               |
| 59 | GO:0031214                                       | biomineral tissue development                                                 |
| 60 | GO:0033993                                       | response to lipid                                                             |
| 61 | GO:0002686                                       | negative regulation of leukocyte migration                                    |
| 62 | GO:0010181                                       | FMN binding                                                                   |
| 63 | GO:0071000                                       | response to magnetism                                                         |
| 64 | GO:0070087                                       | chromo shadow domain binding                                                  |
| 65 | GO:0060206                                       | estrous cycle phase                                                           |
| 66 | GO:0030666                                       | endocytic vesicle membrane                                                    |
| 67 | GO:0006311                                       | meiotic gene conversion                                                       |
| 68 | GO:0090259                                       | regulation of retinal ganglion cell axon guidance                             |
| 69 | GO:0002031                                       | G-protein coupled receptor internalization                                    |
| 70 | GO:0030276                                       | clathrin binding                                                              |
| 71 | GO:0048733                                       | sebaceous gland development                                                   |
| 72 | GO:0003995                                       | acyl-CoA dehydrogenase activity                                               |
| 73 | GO:0000079                                       | regulation of cyclin-dependent protein<br>serine/threonine kinase activity    |

|     |            |                                                                     |
|-----|------------|---------------------------------------------------------------------|
| 74  | GO:0052856 | NADHX epimerase activity                                            |
| 75  | GO:0001786 | phosphatidylserine binding                                          |
| 76  | GO:0072588 | box H/ACA RNP complex                                               |
| 77  | GO:0000266 | mitochondrial fission                                               |
| 78  | GO:1901165 | positive regulation of trophoblast cell migration                   |
| 79  | GO:0060005 | vestibular reflex                                                   |
| 80  | GO:0045955 | negative regulation of calcium ion-dependent exocytosis             |
| 81  | GO:0045124 | regulation of bone resorption                                       |
| 82  | GO:0097025 | MPP7-DLG1-LIN7 complex                                              |
| 83  | GO:0007004 | telomere maintenance via telomerase                                 |
| 84  | GO:0044780 | bacterial-type flagellum assembly                                   |
| 85  | GO:0035441 | cell migration involved in vasculogenesis                           |
| 86  | GO:0060292 | long term synaptic depression                                       |
| 87  | GO:0048671 | negative regulation of collateral sprouting                         |
| 88  | GO:0032395 | MHC class II receptor activity                                      |
| 89  | GO:0002064 | epithelial cell development                                         |
| 90  | GO:0016829 | lyase activity                                                      |
| 91  | GO:0007289 | spermatid nucleus differentiation                                   |
| 92  | GO:0021535 | cell migration in hindbrain                                         |
| 93  | GO:0051344 | negative regulation of cyclic-nucleotide phosphodiesterase activity |
| 94  | GO:0004864 | protein phosphatase inhibitor activity                              |
| 95  | GO:0031669 | cellular response to nutrient levels                                |
| 96  | GO:0031077 | post-embryonic camera-type eye development                          |
| 97  | GO:0051017 | actin filament bundle assembly                                      |
| 98  | GO:0010159 | specification of organ position                                     |
| 99  | GO:0016740 | transferase activity                                                |
| 100 | GO:0016922 | ligand-dependent nuclear receptor binding                           |
| 101 | GO:0005635 | nuclear envelope                                                    |
| 102 | GO:0046983 | protein dimerization activity                                       |
| 103 | GO:0031208 | POZ domain binding                                                  |
| 104 | GO:0009566 | fertilization                                                       |
| 105 | GO:0050663 | cytokine secretion                                                  |
| 106 | GO:0048608 | reproductive structure development                                  |
| 107 | GO:0005847 | mRNA cleavage and polyadenylation specificity factor complex        |
| 108 | GO:0031595 | nuclear proteasome complex                                          |
| 109 | GO:0030258 | lipid modification                                                  |
| 110 | GO:0030122 | AP-2 adaptor complex                                                |
| 111 | GO:0002218 | activation of innate immune response                                |
| 112 | GO:0032584 | growth cone membrane                                                |
| 113 | GO:0008366 | axon ensheathment                                                   |
| 114 | GO:0002384 | hepatic immune response                                             |



|     |                           |                                                                          |
|-----|---------------------------|--------------------------------------------------------------------------|
| 115 | GO:2000179                | positive regulation of neural precursor cell proliferation               |
| 116 | GO:0045161                | neuronal ion channel clustering                                          |
| 117 | GO:0005308                | creatine transmembrane transporter activity                              |
| 118 | GO:0005522                | profilin binding                                                         |
| 119 | GO:2000310                | regulation of N-methyl-D-aspartate selective glutamate receptor activity |
| 120 | GO:0006970                | response to osmotic stress                                               |
| 121 | GO:0030201                | heparan sulfate proteoglycan metabolic process                           |
| 122 | GO:0031225                | anchored component of membrane                                           |
| 123 | GO:0051014                | actin filament severing                                                  |
| 124 | GO:0000045                | autophagic vacuole assembly                                              |
| 125 | GO:0006796                | phosphate-containing compound metabolic process                          |
| 126 | GO:0043279                | response to alkaloid                                                     |
| 127 | GO:0035900                | response to isolation stress                                             |
| 128 | GO:0034021                | response to silicon dioxide                                              |
| 129 | GO:0051209                | release of sequestered calcium ion into cytosol                          |
| 130 | GO:0006069                | ethanol oxidation                                                        |
| 131 | GO:0006449                | regulation of translational termination                                  |
| 132 | GO:0060235                | lens induction in camera-type eye                                        |
| 133 | GO:0004479                | methionyl-tRNA formyltransferase activity                                |
| 134 | GO:0048730                | epidermis morphogenesis                                                  |
| 135 | GO:0050729                | positive regulation of inflammatory response                             |
| 136 | GO:0032211                | negative regulation of telomere maintenance via telomerase               |
| 137 | GO:0097362                | MCM8-MCM9 complex                                                        |
| 138 | GO:0008047                | enzyme activator activity                                                |
| 139 | GO:0060745                | mammary gland branching involved in pregnancy                            |
| 140 | GO:0043085                | positive regulation of catalytic activity                                |
| 141 | GO:0001912                | positive regulation of leukocyte mediated cytotoxicity                   |
| 142 | GO:0008340                | determination of adult lifespan                                          |
| 143 | GO:0030991                | intraciliary transport particle A                                        |
| 144 | GO:0001835                | blastocyst hatching                                                      |
| 145 | GO:0016831                | carboxy-lyase activity                                                   |
| 146 | GO:0051974                | negative regulation of telomerase activity                               |
| 147 | GO:0001825                | blastocyst formation                                                     |
| 148 | GO:0010940                | positive regulation of necrotic cell death                               |
| 149 | GO:0014842                | regulation of satellite cell proliferation                               |
| 150 | GO:0005415                | nucleoside:sodium symporter activity                                     |
| 151 | KEGG:Steroid_biosynthesis |                                                                          |
| 152 | GO:0051591                | response to cAMP                                                         |

|     |                              |                                                                                                  |
|-----|------------------------------|--------------------------------------------------------------------------------------------------|
| 153 | GO:0048007                   | antigen processing and presentation, exogenous lipid antigen via MHC class Ib                    |
| 154 | GO:0033791                   | 3alpha,7alpha,12alpha-trihydroxy-5beta-cholestanoyl-CoA 24-hydroxylase activity                  |
| 155 | GO:0006906                   | vesicle fusion                                                                                   |
| 156 | GO:0009620                   | response to fungus                                                                               |
| 157 | GO:0090265                   | positive regulation of immune complex clearance by monocytes and macrophages                     |
| 158 | GO:0090082                   | positive regulation of heart induction by negative regulation of canonical Wnt signaling pathway |
| 159 | GO:0072044                   | collecting duct development                                                                      |
| 160 | GO:0000783                   | nuclear telomere cap complex                                                                     |
| 161 | GO:0008504                   | monoamine transmembrane transporter activity                                                     |
| 162 | GO:0030718                   | germ-line stem cell maintenance                                                                  |
| 163 | GO:0032757                   | positive regulation of interleukin-8 production                                                  |
| 164 | GO:0002906                   | negative regulation of mature B cell apoptotic process                                           |
| 165 | GO:2000872                   | positive regulation of progesterone secretion                                                    |
| 166 | GO:0031461                   | cullin-RING ubiquitin ligase complex                                                             |
| 167 | GO:0022028                   | tangential migration from the subventricular zone to the olfactory bulb                          |
| 168 | GO:0032794                   | GTPase activating protein binding                                                                |
| 169 | GO:0044292                   | dendrite terminus                                                                                |
| 170 | GO:0005658                   | alpha DNA polymerase:primase complex                                                             |
| 171 | GO:0021979                   | hypothalamus cell differentiation                                                                |
| 172 | GO:0032479                   | regulation of type I interferon production                                                       |
| 173 | GO:0008483                   | transaminase activity                                                                            |
| 174 | GO:0006820                   | anion transport                                                                                  |
| 175 | GO:0035640                   | exploration behavior                                                                             |
| 176 | KEGG:Notch_signaling_pathway |                                                                                                  |
| 177 | GO:0008066                   | glutamate receptor activity                                                                      |
| 178 | GO:0045947                   | negative regulation of translational initiation                                                  |
| 179 | GO:0030502                   | negative regulation of bone mineralization                                                       |
| 180 | GO:0030540                   | female genitalia development                                                                     |
| 181 | GO:0060152                   | microtubule-based peroxisome localization                                                        |
| 182 | GO:0071226                   | cellular response to molecule of fungal origin                                                   |
| 183 | GO:0035239                   | tube morphogenesis                                                                               |
| 184 | GO:0043398                   | HLH domain binding                                                                               |
| 185 | GO:0043587                   | tongue morphogenesis                                                                             |
| 186 | GO:0042645                   | mitochondrial nucleoid                                                                           |
| 187 | GO:0070300                   | phosphatidic acid binding                                                                        |
| 188 | GO:1902560                   | GMP reductase complex                                                                            |
| 189 | GO:0043030                   | regulation of macrophage activation                                                              |

|     |            |                                                                             |
|-----|------------|-----------------------------------------------------------------------------|
| 190 | GO:0030234 | enzyme regulator activity                                                   |
| 191 | GO:0065010 | extracellular membrane-bounded organelle                                    |
| 192 | GO:0080132 | fatty acid alpha-hydroxylase activity                                       |
| 193 | GO:0051353 | positive regulation of oxidoreductase activity                              |
| 194 | GO:0005964 | phosphorylase kinase complex                                                |
| 195 | GO:0071837 | HMG box domain binding                                                      |
| 196 | GO:0050434 | positive regulation of viral transcription                                  |
| 197 | GO:0001306 | age-dependent response to oxidative stress                                  |
| 198 | GO:0031519 | PcG protein complex                                                         |
| 199 | GO:0000308 | cytoplasmic cyclin-dependent protein kinase<br>holoenzyme complex           |
| 200 | GO:0051097 | negative regulation of helicase activity                                    |
| 201 | GO:0032202 | telomere assembly                                                           |
| 202 | GO:0048660 | regulation of smooth muscle cell proliferation                              |
| 203 | GO:0051963 | regulation of synapse assembly                                              |
| 204 | GO:0060033 | anatomical structure regression                                             |
| 205 | GO:0006003 | fructose 2,6-bisphosphate metabolic process                                 |
| 206 | GO:0051901 | positive regulation of mitochondrial<br>depolarization                      |
| 207 | GO:0032588 | trans-Golgi network membrane                                                |
| 208 | GO:0043626 | PCNA complex                                                                |
| 209 | GO:0072277 | metanephric glomerular capillary formation                                  |
| 210 | GO:0031262 | Ndc80 complex                                                               |
| 211 | GO:0051279 | regulation of release of sequestered calcium ion<br>into cytosol            |
| 212 | GO:0015844 | monoamine transport                                                         |
| 213 | GO:0003245 | cardiac muscle tissue growth involved in heart<br>morphogenesis             |
| 214 | GO:0032714 | negative regulation of interleukin-5 production                             |
| 215 | GO:0035851 | Kruppel-associated box domain binding                                       |
| 216 | GO:0090051 | negative regulation of cell migration involved in<br>sprouting angiogenesis |
| 217 | GO:0042135 | neurotransmitter catabolic process                                          |
| 218 | GO:0019534 | toxin transporter activity                                                  |
| 219 | GO:0021895 | cerebral cortex neuron differentiation                                      |
| 220 | GO:0071674 | mononuclear cell migration                                                  |
| 221 | GO:0060004 | reflex                                                                      |
| 222 | GO:0034273 | Atg1p signaling complex                                                     |
| 223 | GO:0000775 | chromosome, centromeric region                                              |
| 224 | GO:0002682 | regulation of immune system process                                         |
| 225 | GO:0007141 | male meiosis I                                                              |
| 226 | GO:0042169 | SH2 domain binding                                                          |
| 227 | GO:0032722 | positive regulation of chemokine production                                 |
| 228 | GO:0021984 | adenohypophysis development                                                 |

|     |            |                                                                                           |
|-----|------------|-------------------------------------------------------------------------------------------|
| 229 | GO:0035726 | common myeloid progenitor cell proliferation                                              |
| 230 | GO:0045059 | positive thymic T cell selection                                                          |
| 231 | GO:0015238 | drug transmembrane transporter activity                                                   |
| 232 | GO:0072284 | metanephric S-shaped body morphogenesis                                                   |
| 233 | GO:0019900 | kinase binding                                                                            |
| 234 | GO:0006700 | C21-steroid hormone biosynthetic process                                                  |
| 235 | GO:0016857 | racemase and epimerase activity, acting on carbohydrates and derivatives                  |
| 236 | GO:0051525 | NFAT protein binding                                                                      |
| 237 | GO:0005753 | mitochondrial proton-transporting ATP synthase complex                                    |
| 238 | GO:0050878 | regulation of body fluid levels                                                           |
| 239 | GO:0003006 | developmental process involved in reproduction                                            |
| 240 | GO:0060252 | positive regulation of glial cell proliferation                                           |
| 241 | GO:0040012 | regulation of locomotion                                                                  |
| 242 | GO:0008276 | protein methyltransferase activity                                                        |
| 243 | GO:0055093 | response to hyperoxia                                                                     |
| 244 | GO:2001022 | positive regulation of response to DNA damage stimulus                                    |
| 245 | GO:0030278 | regulation of ossification                                                                |
| 246 | GO:0002237 | response to molecule of bacterial origin                                                  |
| 247 | GO:0090261 | positive regulation of inclusion body assembly                                            |
| 248 | GO:0001961 | positive regulation of cytokine-mediated signaling pathway                                |
| 249 | GO:1900181 | negative regulation of protein localization to nucleus                                    |
| 250 | GO:2000036 | regulation of stem cell maintenance                                                       |
| 251 | GO:0042610 | CD8 receptor binding                                                                      |
| 252 | GO:0030500 | regulation of bone mineralization                                                         |
| 253 | GO:0031497 | chromatin assembly                                                                        |
| 254 | GO:0031965 | nuclear membrane                                                                          |
| 255 | GO:0006066 | alcohol metabolic process                                                                 |
| 256 | GO:0034260 | negative regulation of GTPase activity                                                    |
| 257 | GO:0002504 | antigen processing and presentation of peptide or polysaccharide antigen via MHC class II |
| 258 | GO:0042628 | mating plug formation                                                                     |
| 259 | GO:0030658 | transport vesicle membrane                                                                |
| 260 | GO:0007422 | peripheral nervous system development                                                     |
| 261 | GO:0002095 | caveolar macromolecular signaling complex                                                 |
| 262 | GO:0043277 | apoptotic cell clearance                                                                  |
| 263 | GO:0061029 | eyelid development in camera-type eye                                                     |
| 264 | GO:0034452 | dynactin binding                                                                          |
| 265 | GO:0038085 | vascular endothelial growth factor binding                                                |
| 266 | GO:0003016 | respiratory system process                                                                |

|     |                            |                                                                                                                                    |
|-----|----------------------------|------------------------------------------------------------------------------------------------------------------------------------|
| 267 | GO:0021522                 | spinal cord motor neuron differentiation                                                                                           |
| 268 | GO:0050709                 | negative regulation of protein secretion                                                                                           |
| 269 | GO:0003181                 | atrioventricular valve morphogenesis                                                                                               |
| 270 | GO:0007040                 | lysosome organization                                                                                                              |
| 271 | GO:0006812                 | cation transport                                                                                                                   |
| 272 | GO:0032270                 | positive regulation of cellular protein metabolic process                                                                          |
| 273 | GO:0043203                 | axon hillock                                                                                                                       |
| 274 | GO:0030864                 | cortical actin cytoskeleton                                                                                                        |
| 275 | GO:0008194                 | UDP-glycosyltransferase activity                                                                                                   |
| 276 | GO:0060242                 | contact inhibition                                                                                                                 |
| 277 | GO:0043931                 | ossification involved in bone maturation                                                                                           |
| 278 | GO:0030321                 | transepithelial chloride transport                                                                                                 |
| 279 | GO:0007098                 | centrosome cycle                                                                                                                   |
| 280 | GO:1901998                 | toxin transport                                                                                                                    |
| 281 | GO:0051788                 | response to misfolded protein                                                                                                      |
| 282 | GO:0060017                 | parathyroid gland development                                                                                                      |
| 283 | GO:0001726                 | ruffle                                                                                                                             |
| 284 | GO:0022612                 | gland morphogenesis                                                                                                                |
| 285 | GO:0019003                 | GDP binding                                                                                                                        |
| 286 | GO:0060385                 | axonogenesis involved in innervation                                                                                               |
| 287 | GO:0010891                 | negative regulation of sequestering of triglyceride                                                                                |
| 288 | GO:0023026                 | MHC class II protein complex binding                                                                                               |
| 289 | GO:0071502                 | cellular response to temperature stimulus                                                                                          |
| 290 | GO:0001964                 | startle response                                                                                                                   |
| 291 | KEGG:Folate_biosynthesis   |                                                                                                                                    |
| 292 | GO:0032839                 | dendrite cytoplasm                                                                                                                 |
| 293 | GO:2001190                 | positive regulation of T cell activation via T cell receptor contact with antigen bound to MHC molecule on antigen presenting cell |
| 294 | GO:0071529                 | cementum mineralization                                                                                                            |
| 295 | GO:0010269                 | response to selenium ion                                                                                                           |
| 296 | KEGG:Tryptophan_metabolism |                                                                                                                                    |
| 297 | GO:0033599                 | regulation of mammary gland epithelial cell proliferation                                                                          |
| 298 | GO:0090399                 | replicative senescence                                                                                                             |
| 299 | GO:0030970                 | retrograde protein transport, ER to cytosol                                                                                        |
| 300 | GO:0008023                 | transcription elongation factor complex                                                                                            |
| 301 | GO:0072179                 | nephric duct formation                                                                                                             |
| 302 | GO:0033603                 | positive regulation of dopamine secretion                                                                                          |
| 303 | GO:0048515                 | spermatid differentiation                                                                                                          |
| 304 | GO:0019985                 | translesion synthesis                                                                                                              |
| 305 | GO:0030177                 | positive regulation of Wnt signaling pathway                                                                                       |

|     |                                          |                                                                           |
|-----|------------------------------------------|---------------------------------------------------------------------------|
| 306 | GO:2001028                               | positive regulation of endothelial cell chemotaxis                        |
| 307 | GO:0043117                               | positive regulation of vascular permeability                              |
| 308 | GO:0016504                               | peptidase activator activity                                              |
| 309 | GO:0046010                               | positive regulation of circadian sleep/wake cycle, non-REM sleep          |
| 310 | GO:0002227                               | innate immune response in mucosa                                          |
| 311 | GO:0002021                               | response to dietary excess                                                |
| 312 | GO:0016757                               | transferase activity, transferring glycosyl groups                        |
| 313 | GO:0046928                               | regulation of neurotransmitter secretion                                  |
| 314 | GO:0090325                               | regulation of locomotion involved in locomotory behavior                  |
| 315 | GO:0006337                               | nucleosome disassembly                                                    |
| 316 | GO:0051648                               | vesicle localization                                                      |
| 317 | GO:0046855                               | inositol phosphate dephosphorylation                                      |
| 318 | GO:0032393                               | MHC class I receptor activity                                             |
| 319 | KEGG:NOD_like_receptor_signaling_pathway |                                                                           |
| 320 | GO:0033257                               | Bcl3/NF-kappaB2 complex                                                   |
| 321 | GO:0015797                               | mannitol transport                                                        |
| 322 | GO:0001833                               | inner cell mass cell proliferation                                        |
| 323 | GO:0010842                               | retina layer formation                                                    |
| 324 | GO:0010008                               | endosome membrane                                                         |
| 325 | GO:0031346                               | positive regulation of cell projection organization                       |
| 326 | GO:0008053                               | mitochondrial fusion                                                      |
| 327 | GO:2000020                               | positive regulation of male gonad development                             |
| 328 | GO:0031915                               | positive regulation of synaptic plasticity                                |
| 329 | GO:0032675                               | regulation of interleukin-6 production                                    |
| 330 | GO:0021747                               | cochlear nucleus development                                              |
| 331 | GO:0060428                               | lung epithelium development                                               |
| 332 | GO:0006900                               | membrane budding                                                          |
| 333 | GO:0002455                               | humoral immune response mediated by circulating immunoglobulin            |
| 334 | GO:0007144                               | female meiosis I                                                          |
| 335 | GO:0048588                               | developmental cell growth                                                 |
| 336 | GO:0042113                               | B cell activation                                                         |
| 337 | GO:0097452                               | GAIT complex                                                              |
| 338 | GO:0071922                               | regulation of cohesin localization to chromatin                           |
| 339 | GO:0003136                               | negative regulation of heart induction by canonical Wnt signaling pathway |
| 340 | GO:0030229                               | very-low-density lipoprotein particle receptor activity                   |
| 341 | GO:0032490                               | detection of molecule of bacterial origin                                 |

|     |                                        |                                                                               |
|-----|----------------------------------------|-------------------------------------------------------------------------------|
| 342 | GO:0005544                             | calcium-dependent phospholipid binding                                        |
| 343 | GO:0030337                             | DNA polymerase processivity factor activity                                   |
| 344 | GO:0000275                             | mitochondrial proton-transporting ATP synthase complex, catalytic core F(1)   |
| 345 | GO:0009893                             | positive regulation of metabolic process                                      |
| 346 | GO:0090344                             | negative regulation of cell aging                                             |
| 347 | GO:0070491                             | repressing transcription factor binding                                       |
| 348 | GO:0050772                             | positive regulation of axonogenesis                                           |
| 349 | GO:0006605                             | protein targeting                                                             |
| 350 | GO:0005721                             | centromeric heterochromatin                                                   |
| 351 | GO:0030322                             | stabilization of membrane potential                                           |
| 352 | GO:0003360                             | brainstem development                                                         |
| 353 | KEGG:Pantothenate_and_CoA_biosynthesis |                                                                               |
| 354 | GO:0042809                             | vitamin D receptor binding                                                    |
| 355 | GO:0001965                             | G-protein alpha-subunit binding                                               |
| 356 | GO:0070557                             | PCNA-p21 complex                                                              |
| 357 | GO:0061303                             | cornea development in camera-type eye                                         |
| 358 | GO:0014878                             | response to electrical stimulus involved in regulation of muscle adaptation   |
| 359 | GO:0022857                             | transmembrane transporter activity                                            |
| 360 | GO:0035240                             | dopamine binding                                                              |
| 361 | GO:0016742                             | hydroxymethyl-, formyl- and related transferase activity                      |
| 362 | GO:2000687                             | negative regulation of rubidium ion transmembrane transporter activity        |
| 363 | GO:0007618                             | mating                                                                        |
| 364 | GO:0019048                             | modulation by virus of host morphology or physiology                          |
| 365 | GO:0032549                             | ribonucleoside binding                                                        |
| 366 | GO:2000681                             | negative regulation of rubidium ion transport                                 |
| 367 | GO:0010871                             | negative regulation of receptor biosynthetic process                          |
| 368 | GO:0042118                             | endothelial cell activation                                                   |
| 369 | GO:0010259                             | multicellular organismal aging                                                |
| 370 | GO:0060730                             | regulation of intestinal epithelial structure maintenance                     |
| 371 | GO:0043254                             | regulation of protein complex assembly                                        |
| 372 | GO:0060058                             | positive regulation of apoptotic process involved in mammary gland involution |
| 373 | GO:0048332                             | mesoderm morphogenesis                                                        |
| 374 | GO:0032754                             | positive regulation of interleukin-5 production                               |
| 375 | GO:0051656                             | establishment of organelle localization                                       |
| 376 | GO:0007268                             | synaptic transmission                                                         |

|     |                                               |                                                                              |
|-----|-----------------------------------------------|------------------------------------------------------------------------------|
| 377 | GO:0090191                                    | negative regulation of branching involved in ureteric bud morphogenesis      |
| 378 | GO:0019905                                    | syntaxin binding                                                             |
| 379 | GO:0006390                                    | transcription from mitochondrial promoter                                    |
| 380 | GO:0016234                                    | inclusion body                                                               |
| 381 | GO:0048562                                    | embryonic organ morphogenesis                                                |
| 382 | GO:0050673                                    | epithelial cell proliferation                                                |
| 383 | GO:0007548                                    | sex differentiation                                                          |
| 384 | GO:0030014                                    | CCR4-NOT complex                                                             |
| 385 | GO:0044183                                    | protein binding involved in protein folding                                  |
| 386 | GO:0016578                                    | histone deubiquitination                                                     |
| 387 | GO:0010977                                    | negative regulation of neuron projection development                         |
| 388 | GO:0043148                                    | mitotic spindle stabilization                                                |
| 389 | GO:0071257                                    | cellular response to electrical stimulus                                     |
| 390 | GO:0043568                                    | positive regulation of insulin-like growth factor receptor signaling pathway |
| 391 | GO:0032304                                    | negative regulation of icosanoid secretion                                   |
| 392 | GO:0034188                                    | apolipoprotein A-I receptor activity                                         |
| 393 | GO:0070507                                    | regulation of microtubule cytoskeleton organization                          |
| 394 | GO:0070194                                    | synaptonemal complex disassembly                                             |
| 395 | GO:0043647                                    | inositol phosphate metabolic process                                         |
| 396 | GO:0048599                                    | oocyte development                                                           |
| 397 | GO:0048755                                    | branching morphogenesis of a nerve                                           |
| 398 | KEGG:Valine_leucine_and_ileucine_biosynthesis |                                                                              |
| 399 | GO:0019135                                    | deoxyhypusine monooxygenase activity                                         |
| 400 | GO:0061108                                    | seminal vesicle epithelium development                                       |
| 401 | GO:0031937                                    | positive regulation of chromatin silencing                                   |
| 402 | GO:0008503                                    | benzodiazepine receptor activity                                             |
| 403 | GO:0032715                                    | negative regulation of interleukin-6 production                              |
| 404 | GO:2000505                                    | regulation of energy homeostasis                                             |
| 405 | GO:0002819                                    | regulation of adaptive immune response                                       |
| 406 | GO:0060037                                    | pharyngeal system development                                                |
| 407 | GO:2000301                                    | negative regulation of synaptic vesicle exocytosis                           |
| 408 | GO:0051900                                    | regulation of mitochondrial depolarization                                   |
| 409 | GO:0055123                                    | digestive system development                                                 |
| 410 | GO:0048550                                    | negative regulation of pinocytosis                                           |
| 411 | GO:0042393                                    | histone binding                                                              |
| 412 | GO:0000731                                    | DNA synthesis involved in DNA repair                                         |
| 413 | GO:0051787                                    | misfolded protein binding                                                    |
| 414 | GO:0042592                                    | homeostatic process                                                          |



|     |                                  |                                                                                                           |
|-----|----------------------------------|-----------------------------------------------------------------------------------------------------------|
| 415 | GO:0072358                       | cardiovascular system development                                                                         |
| 416 | GO:0035014                       | phosphatidylinositol 3-kinase regulator activity                                                          |
| 417 | GO:2001193                       | positive regulation of gamma-delta T cell<br>activation involved in immune response                       |
| 418 | GO:0007059                       | chromosome segregation                                                                                    |
| 419 | GO:0015660                       | formate efflux transmembrane transporter<br>activity                                                      |
| 420 | GO:0002080                       | acrosomal membrane                                                                                        |
| 421 | GO:0007398                       | ectoderm development                                                                                      |
| 422 | GO:0005750                       | mitochondrial respiratory chain complex III                                                               |
| 423 | GO:0042723                       | thiamine-containing compound metabolic<br>process                                                         |
| 424 | GO:0060324                       | face development                                                                                          |
| 425 | GO:0006342                       | chromatin silencing                                                                                       |
| 426 | GO:0009838                       | abscission                                                                                                |
| 427 | GO:0019915                       | lipid storage                                                                                             |
| 428 | GO:0010941                       | regulation of cell death                                                                                  |
| 429 | GO:0048311                       | mitochondrion distribution                                                                                |
| 430 | KEGG:Phagosome                   |                                                                                                           |
| 431 | GO:0010266                       | response to vitamin B1                                                                                    |
| 432 | GO:0030534                       | adult behavior                                                                                            |
| 433 | KEGG:Selenoamino_acid_metabolism |                                                                                                           |
| 434 | GO:0032480                       | negative regulation of type I interferon<br>production                                                    |
| 435 | GO:0002860                       | positive regulation of natural killer cell<br>mediated cytotoxicity directed against tumor<br>cell target |
| 436 | GO:0050427                       | 3'-phosphoadenosine 5'-phosphosulfate<br>metabolic process                                                |
| 437 | GO:0008593                       | regulation of Notch signaling pathway                                                                     |
| 438 | GO:0007405                       | neuroblast proliferation                                                                                  |
| 439 | GO:0034189                       | very-low-density lipoprotein particle binding                                                             |
| 440 | GO:0015659                       | formate uptake transmembrane transporter<br>activity                                                      |
| 441 | GO:0030975                       | thiamine binding                                                                                          |
| 442 | GO:0008622                       | epsilon DNA polymerase complex                                                                            |
| 443 | GO:0060769                       | positive regulation of epithelial cell proliferation<br>involved in prostate gland development            |
| 444 | GO:0050733                       | RS domain binding                                                                                         |
| 445 | GO:0042473                       | outer ear morphogenesis                                                                                   |
| 446 | GO:0097016                       | L27 domain binding                                                                                        |
| 447 | GO:0030119                       | AP-type membrane coat adaptor complex                                                                     |
| 448 | GO:1990111                       | spermatoproteasome complex                                                                                |
| 449 | GO:0032466                       | negative regulation of cytokinesis                                                                        |

|     |                                         |                                                                                                                       |
|-----|-----------------------------------------|-----------------------------------------------------------------------------------------------------------------------|
| 450 | GO:0003192                              | mitral valve formation                                                                                                |
| 451 | GO:0030516                              | regulation of axon extension                                                                                          |
| 452 | GO:0002821                              | positive regulation of adaptive immune response                                                                       |
| 453 | GO:0000139                              | Golgi membrane                                                                                                        |
| 454 | GO:0030323                              | respiratory tube development                                                                                          |
| 455 | GO:0072089                              | stem cell proliferation                                                                                               |
| 456 | GO:0008093                              | cytoskeletal adaptor activity                                                                                         |
| 457 | GO:0044530                              | supraspliceosomal complex                                                                                             |
| 458 | GO:0036120                              | cellular response to platelet-derived growth factor stimulus                                                          |
| 459 | GO:0010172                              | embryonic body morphogenesis                                                                                          |
| 460 | GO:0030896                              | checkpoint clamp complex                                                                                              |
| 461 | GO:0002764                              | immune response-regulating signaling pathway                                                                          |
| 462 | GO:0010369                              | chromocenter                                                                                                          |
| 463 | GO:0015211                              | purine nucleoside transmembrane transporter activity                                                                  |
| 464 | GO:1902108                              | regulation of mitochondrial membrane permeability involved in apoptotic process                                       |
| 465 | GO:0046907                              | intracellular transport                                                                                               |
| 466 | GO:0006983                              | ER overload response                                                                                                  |
| 467 | GO:0038091                              | positive regulation of cell proliferation by VEGF-activated platelet derived growth factor receptor signaling pathway |
| 468 | GO:0032801                              | receptor catabolic process                                                                                            |
| 469 | GO:0019209                              | kinase activator activity                                                                                             |
| 470 | GO:0019871                              | sodium channel inhibitor activity                                                                                     |
| 471 | GO:0045023                              | G0 to G1 transition                                                                                                   |
| 472 | GO:0032878                              | regulation of establishment or maintenance of cell polarity                                                           |
| 473 | GO:0050710                              | negative regulation of cytokine secretion                                                                             |
| 474 | GO:0010952                              | positive regulation of peptidase activity                                                                             |
| 475 | GO:0031528                              | microvillus membrane                                                                                                  |
| 476 | GO:0006959                              | humoral immune response                                                                                               |
| 477 | GO:0030100                              | regulation of endocytosis                                                                                             |
| 478 | GO:0048539                              | bone marrow development                                                                                               |
| 479 | GO:0038096                              | Fc-gamma receptor signaling pathway involved in phagocytosis                                                          |
| 480 | KEGG:Cysteine_and_methionine_metabolism |                                                                                                                       |
| 481 | GO:0048854                              | brain morphogenesis                                                                                                   |
| 482 | GO:0010826                              | negative regulation of centrosome duplication                                                                         |
| 483 | GO:0055098                              | response to low-density lipoprotein particle                                                                          |
| 484 | GO:0043393                              | regulation of protein binding                                                                                         |
| 485 | GO:0051798                              | positive regulation of hair follicle development                                                                      |

|     |                 |                                                                            |
|-----|-----------------|----------------------------------------------------------------------------|
| 486 | GO:0042734      | presynaptic membrane                                                       |
| 487 | GO:0060716      | labyrinthine layer blood vessel development                                |
| 488 | GO:0097227      | sperm annulus                                                              |
| 489 | GO:0006282      | regulation of DNA repair                                                   |
| 490 | GO:0043296      | apical junction complex                                                    |
| 491 | GO:0000151      | ubiquitin ligase complex                                                   |
| 492 | GO:0006520      | cellular amino acid metabolic process                                      |
| 493 | GO:0010997      | anaphase-promoting complex binding                                         |
| 494 | GO:0051438      | regulation of ubiquitin-protein ligase activity                            |
| 495 | GO:0043237      | laminin-1 binding                                                          |
| 496 | GO:0030870      | Mre11 complex                                                              |
| 497 | GO:0042019      | interleukin-23 binding                                                     |
| 498 | GO:0035358      | regulation of peroxisome proliferator activated receptor signaling pathway |
| 499 | GO:0060523      | prostate epithelial cord elongation                                        |
| 500 | GO:0001546      | preantral ovarian follicle growth                                          |
| 501 | GO:0006450      | regulation of translational fidelity                                       |
| 502 | GO:0060253      | negative regulation of glial cell proliferation                            |
| 503 | GO:0012501      | programmed cell death                                                      |
| 504 | GO:0005758      | mitochondrial intermembrane space                                          |
| 505 | KEGG:Peroxisome |                                                                            |
| 506 | GO:0070603      | SWI/SNF superfamily-type complex                                           |
| 507 | GO:0050682      | AF-2 domain binding                                                        |
| 508 | GO:0022405      | hair cycle process                                                         |
| 509 | GO:0042168      | heme metabolic process                                                     |
| 510 | GO:0030131      | clathrin adaptor complex                                                   |
| 511 | GO:0019043      | establishment of viral latency                                             |
| 512 | GO:0016574      | histone ubiquitination                                                     |
| 513 | GO:0031072      | heat shock protein binding                                                 |
| 514 | GO:0045747      | positive regulation of Notch signaling pathway                             |
| 515 | GO:0005096      | GTPase activator activity                                                  |
| 516 | GO:0042589      | zymogen granule membrane                                                   |
| 517 | GO:0048144      | fibroblast proliferation                                                   |
| 518 | GO:0035176      | social behavior                                                            |
| 519 | GO:0010718      | positive regulation of epithelial to mesenchymal transition                |
| 520 | GO:1990138      | neuron projection extension                                                |
| 521 | GO:0032066      | nucleolus to nucleoplasm transport                                         |
| 522 | GO:0046500      | S-adenosylmethionine metabolic process                                     |
| 523 | GO:0002639      | positive regulation of immunoglobulin production                           |
| 524 | GO:0030031      | cell projection assembly                                                   |
| 525 | GO:0035148      | tube formation                                                             |
| 526 | GO:0005602      | complement component C1 complex                                            |

|     |            |                                                                       |
|-----|------------|-----------------------------------------------------------------------|
| 527 | GO:0060042 | retina morphogenesis in camera-type eye                               |
| 528 | GO:0004509 | steroid 21-monooxygenase activity                                     |
| 529 | GO:0045070 | positive regulation of viral genome replication                       |
| 530 | GO:0035276 | ethanol binding                                                       |
| 531 | GO:0014740 | negative regulation of muscle hyperplasia                             |
| 532 | GO:0005761 | mitochondrial ribosome                                                |
| 533 | GO:0030431 | sleep                                                                 |
| 534 | GO:0003180 | aortic valve morphogenesis                                            |
| 535 | GO:0007126 | meiosis                                                               |
| 536 | GO:0048306 | calcium-dependent protein binding                                     |
| 537 | GO:0005344 | oxygen transporter activity                                           |
| 538 | GO:0003143 | embryonic heart tube morphogenesis                                    |
| 539 | GO:0031428 | box C/D snoRNP complex                                                |
| 540 | GO:0008277 | regulation of G-protein coupled receptor protein signaling pathway    |
| 541 | GO:0043412 | macromolecule modification                                            |
| 542 | GO:0048853 | forebrain morphogenesis                                               |
| 543 | GO:0030332 | cyclin binding                                                        |
| 544 | GO:0003906 | DNA-(apurinic or apyrimidinic site) lyase activity                    |
| 545 | GO:0016998 | cell wall macromolecule catabolic process                             |
| 546 | GO:0016810 | hydrolase activity, acting on carbon-nitrogen (but not peptide) bonds |
| 547 | GO:0007420 | brain development                                                     |
| 548 | GO:0006071 | glycerol metabolic process                                            |
| 549 | GO:1902233 | negative regulation of positive thymic T cell selection               |
| 550 | GO:0043586 | tongue development                                                    |
| 551 | GO:0016942 | insulin-like growth factor binding protein complex                    |
| 552 | GO:0043204 | perikaryon                                                            |
| 553 | GO:0072536 | interleukin-23 receptor complex                                       |
| 554 | GO:0005759 | mitochondrial matrix                                                  |
| 555 | GO:0032606 | type I interferon production                                          |
| 556 | GO:0043312 | neutrophil degranulation                                              |
| 557 | GO:0043125 | ErbB-3 class receptor binding                                         |
| 558 | GO:0031295 | T cell costimulation                                                  |
| 559 | GO:2000679 | positive regulation of transcription regulatory region DNA binding    |
| 560 | GO:0051096 | positive regulation of helicase activity                              |
| 561 | GO:0019731 | antibacterial humoral response                                        |
| 562 | GO:0030307 | positive regulation of cell growth                                    |
| 563 | GO:0046651 | lymphocyte proliferation                                              |
| 564 | GO:0060219 | camera-type eye photoreceptor cell                                    |

|     |                               |                                                                      |
|-----|-------------------------------|----------------------------------------------------------------------|
|     |                               | differentiation                                                      |
| 565 | GO:0034124                    | regulation of MyD88-dependent toll-like receptor signaling pathway   |
| 566 | GO:0019207                    | kinase regulator activity                                            |
| 567 | GO:0097060                    | synaptic membrane                                                    |
| 568 | GO:0017126                    | nucleologenesis                                                      |
| 569 | GO:0070403                    | NAD <sup>+</sup> binding                                             |
| 570 | GO:0007494                    | midgut development                                                   |
| 571 | GO:0045298                    | tubulin complex                                                      |
| 572 | GO:0070997                    | neuron death                                                         |
| 573 | GO:0048019                    | receptor antagonist activity                                         |
| 574 | GO:0048265                    | response to pain                                                     |
| 575 | GO:0031023                    | microtubule organizing center organization                           |
| 576 | GO:0007084                    | mitotic nuclear envelope reassembly                                  |
| 577 | GO:0016788                    | hydrolase activity, acting on ester bonds                            |
| 578 | GO:0060694                    | regulation of cholesterol transporter activity                       |
| 579 | GO:0071565                    | nBAF complex                                                         |
| 580 | GO:0007143                    | female meiosis                                                       |
| 581 | GO:0043415                    | positive regulation of skeletal muscle tissue regeneration           |
| 582 | GO:0070365                    | hepatocyte differentiation                                           |
| 583 | GO:0022602                    | ovulation cycle process                                              |
| 584 | GO:0005328                    | neurotransmitter:sodium symporter activity                           |
| 585 | GO:0061025                    | membrane fusion                                                      |
| 586 | GO:0017183                    | peptidyl-diphthamide biosynthetic process from peptidyl-histidine    |
| 587 | GO:0003032                    | detection of oxygen                                                  |
| 588 | KEGG:Primary_immunodeficiency |                                                                      |
| 589 | GO:0050687                    | negative regulation of defense response to virus                     |
| 590 | GO:0005794                    | Golgi apparatus                                                      |
| 591 | GO:0045921                    | positive regulation of exocytosis                                    |
| 592 | GO:0045948                    | positive regulation of translational initiation                      |
| 593 | GO:0033962                    | cytoplasmic mRNA processing body assembly                            |
| 594 | GO:0070064                    | proline-rich region binding                                          |
| 595 | GO:0007399                    | nervous system development                                           |
| 596 | GO:0003209                    | cardiac atrium morphogenesis                                         |
| 597 | GO:0009235                    | cobalamin metabolic process                                          |
| 598 | GO:0006518                    | peptide metabolic process                                            |
| 599 | GO:0009279                    | cell outer membrane                                                  |
| 600 | GO:0015671                    | oxygen transport                                                     |
| 601 | GO:0016050                    | vesicle organization                                                 |
| 602 | GO:0002092                    | positive regulation of receptor internalization                      |
| 603 | GO:0034127                    | regulation of MyD88-independent toll-like receptor signaling pathway |

|     |                           |                                                                                                           |
|-----|---------------------------|-----------------------------------------------------------------------------------------------------------|
| 604 | GO:0006839                | mitochondrial transport                                                                                   |
| 605 | GO:0015949                | nucleobase-containing small molecule interconversion                                                      |
| 606 | GO:0036336                | dendritic cell migration                                                                                  |
| 607 | GO:1900116                | extracellular negative regulation of signal transduction                                                  |
| 608 | KEGG:Base_excision_repair |                                                                                                           |
| 609 | GO:0030010                | establishment of cell polarity                                                                            |
| 610 | GO:1901898                | negative regulation of relaxation of cardiac muscle                                                       |
| 611 | GO:0030548                | acetylcholine receptor regulator activity                                                                 |
| 612 | GO:0004859                | phospholipase inhibitor activity                                                                          |
| 613 | GO:0045056                | transcytosis                                                                                              |
| 614 | GO:0060429                | epithelium development                                                                                    |
| 615 | GO:2000311                | regulation of alpha-amino-3-hydroxy-5-methyl-4-isoxazole propionate selective glutamate receptor activity |
| 616 | GO:0008347                | glial cell migration                                                                                      |
| 617 | GO:0002381                | immunoglobulin production involved in immunoglobulin mediated immune response                             |
| 618 | GO:0070848                | response to growth factor                                                                                 |
| 619 | GO:0060742                | epithelial cell differentiation involved in prostate gland development                                    |
| 620 | GO:0007062                | sister chromatid cohesion                                                                                 |
| 621 | GO:0043588                | skin development                                                                                          |
| 622 | GO:0050795                | regulation of behavior                                                                                    |
| 623 | GO:0070221                | sulfide oxidation, using sulfide:quinone oxidoreductase                                                   |
| 624 | GO:0002520                | immune system development                                                                                 |
| 625 | GO:0045743                | positive regulation of fibroblast growth factor receptor signaling pathway                                |
| 626 | GO:0043514                | interleukin-12 complex                                                                                    |
| 627 | GO:0007290                | spermatid nucleus elongation                                                                              |
| 628 | GO:0002161                | aminoacyl-tRNA editing activity                                                                           |
| 629 | GO:0043023                | ribosomal large subunit binding                                                                           |
| 630 | GO:0051013                | microtubule severing                                                                                      |
| 631 | GO:0031253                | cell projection membrane                                                                                  |
| 632 | GO:0045726                | positive regulation of integrin biosynthetic process                                                      |
| 633 | GO:0030981                | cortical microtubule cytoskeleton                                                                         |
| 634 | GO:0005739                | mitochondrion                                                                                             |
| 635 | GO:0031683                | G-protein beta/gamma-subunit complex binding                                                              |
| 636 | GO:0031720                | haptoglobin binding                                                                                       |
| 637 | GO:0043517                | positive regulation of DNA damage response,                                                               |

|     |                          |                                                   |
|-----|--------------------------|---------------------------------------------------|
| 638 | GO:0005833               | signal transduction by p53 class mediator         |
| 639 | GO:0034465               | hemoglobin complex                                |
| 640 | GO:0034122               | response to carbon monoxide                       |
| 641 | GO:0031047               | negative regulation of toll-like receptor         |
| 642 | GO:0021591               | signaling pathway                                 |
| 643 | GO:0046541               | gene silencing by RNA                             |
| 644 | GO:0000900               | ventricular system development                    |
| 645 | GO:0035035               | saliva secretion                                  |
| 646 | GO:0032876               | translation repressor activity, nucleic acid      |
| 647 | GO:0016080               | binding                                           |
| 648 | GO:0016339               | histone acetyltransferase binding                 |
| 649 | GO:0042692               | negative regulation of DNA endoreduplication      |
| 650 | GO:0045744               | synaptic vesicle targeting                        |
| 651 | GO:0032620               | calcium-dependent cell-cell adhesion              |
| 652 | GO:0006302               | muscle cell differentiation                       |
| 653 | GO:0001655               | negative regulation of G-protein coupled          |
| 654 | GO:0051983               | receptor protein signaling pathway                |
| 655 | GO:0001671               | interleukin-17 production                         |
| 656 | GO:0032580               | double-strand break repair                        |
| 657 | GO:0051973               | urogenital system development                     |
| 658 | GO:0033688               | regulation of chromosome segregation              |
| 659 | GO:0060022               | ATPase activator activity                         |
| 660 | KEGG:Sulfur_relay_system | Golgi cisterna membrane                           |
| 661 | GO:0051100               | positive regulation of telomerase activity        |
| 662 | GO:0035861               | regulation of osteoblast proliferation            |
| 663 | GO:0040020               | hard palate development                           |
| 664 | GO:0019898               | negative regulation of binding                    |
| 665 | GO:0050765               | site of double-strand break                       |
| 666 | GO:0031664               | regulation of meiosis                             |
| 667 | GO:0032793               | extrinsic component of membrane                   |
| 668 | GO:0032421               | negative regulation of phagocytosis               |
| 669 | GO:2000773               | regulation of lipopolysaccharide-mediated         |
| 670 | GO:0002250               | signaling pathway                                 |
| 671 | GO:0042101               | positive regulation of CREB transcription factor  |
| 672 | GO:0060529               | activity                                          |
| 673 | GO:0017119               | stereocilium bundle                               |
|     |                          | negative regulation of cellular senescence        |
|     |                          | adaptive immune response                          |
|     |                          | T cell receptor complex                           |
|     |                          | squamous basal epithelial stem cell               |
|     |                          | differentiation involved in prostate gland acinus |
|     |                          | development                                       |
|     |                          | Golgi transport complex                           |

|     |                                     |                                                                                     |
|-----|-------------------------------------|-------------------------------------------------------------------------------------|
| 674 | GO:0045823                          | positive regulation of heart contraction                                            |
| 675 | GO:2000543                          | positive regulation of gastrulation                                                 |
| 676 | GO:0042743                          | hydrogen peroxide metabolic process                                                 |
| 677 | GO:0010574                          | regulation of vascular endothelial growth factor production                         |
| 678 | GO:0030282                          | bone mineralization                                                                 |
| 679 | GO:0046620                          | regulation of organ growth                                                          |
| 680 | GO:0010642                          | negative regulation of platelet-derived growth factor receptor signaling pathway    |
| 681 | GO:0016242                          | negative regulation of macroautophagy                                               |
| 682 | GO:0030522                          | intracellular receptor signaling pathway                                            |
| 683 | GO:0007030                          | Golgi organization                                                                  |
| 684 | GO:0033144                          | negative regulation of intracellular steroid hormone receptor signaling pathway     |
| 685 | GO:0016874                          | ligase activity                                                                     |
| 686 | GO:0016538                          | cyclin-dependent protein serine/threonine kinase regulator activity                 |
| 687 | GO:0061351                          | neural precursor cell proliferation                                                 |
| 688 | GO:0050819                          | negative regulation of coagulation                                                  |
| 689 | GO:0060135                          | maternal process involved in female pregnancy                                       |
| 690 | GO:0061304                          | retinal blood vessel morphogenesis                                                  |
| 691 | GO:0071110                          | histone biotinylation                                                               |
| 692 | GO:0000002                          | mitochondrial genome maintenance                                                    |
| 693 | GO:0042805                          | actinin binding                                                                     |
| 694 | GO:0005041                          | low-density lipoprotein receptor activity                                           |
| 695 | GO:0048633                          | positive regulation of skeletal muscle tissue growth                                |
| 696 | GO:0007638                          | mechanosensory behavior                                                             |
| 697 | GO:0008494                          | translation activator activity                                                      |
| 698 | GO:0042447                          | hormone catabolic process                                                           |
| 699 | GO:0021680                          | cerebellar Purkinje cell layer development                                          |
| 700 | GO:2000402                          | negative regulation of lymphocyte migration                                         |
| 701 | GO:0002369                          | T cell cytokine production                                                          |
| 702 | GO:0071229                          | cellular response to acid                                                           |
| 703 | GO:0016655                          | oxidoreductase activity, acting on NAD(P)H, quinone or similar compound as acceptor |
| 704 | GO:0016780                          | phosphotransferase activity, for other substituted phosphate groups                 |
| 705 | GO:0072520                          | seminiferous tubule development                                                     |
| 706 | GO:0007617                          | mating behavior                                                                     |
| 707 | GO:0090045                          | positive regulation of deacetylase activity                                         |
| 708 | GO:0005845                          | mRNA cap binding complex                                                            |
| 709 | KEGG:Glycosaminoglycan_biosynthesis |                                                                                     |
| 710 | GO:0045606                          | positive regulation of epidermal cell                                               |



|     |                          |                                                                                    |
|-----|--------------------------|------------------------------------------------------------------------------------|
|     |                          | differentiation                                                                    |
| 711 | GO:2000548               | negative regulation of dendritic cell dendrite assembly                            |
| 712 | GO:0031526               | brush border membrane                                                              |
| 713 | GO:0048278               | vesicle docking                                                                    |
| 714 | GO:0070840               | dynein complex binding                                                             |
| 715 | GO:0017145               | stem cell division                                                                 |
| 716 | GO:0006690               | icosanoid metabolic process                                                        |
| 717 | GO:0051443               | positive regulation of ubiquitin-protein ligase activity                           |
| 718 | GO:0001915               | negative regulation of T cell mediated cytotoxicity                                |
| 719 | GO:0048645               | organ formation                                                                    |
| 720 | GO:0001302               | replicative cell aging                                                             |
| 721 | GO:0033613               | activating transcription factor binding                                            |
| 722 | KEGG:Pyruvate_metabolism |                                                                                    |
| 723 | GO:0007530               | sex determination                                                                  |
| 724 | GO:0005542               | folic acid binding                                                                 |
| 725 | GO:0071438               | invadopodium membrane                                                              |
| 726 | GO:2000549               | positive regulation of dendritic cell dendrite assembly                            |
| 727 | GO:0031017               | exocrine pancreas development                                                      |
| 728 | GO:0070435               | Shc-EGFR complex                                                                   |
| 729 | GO:0001846               | opsonin binding                                                                    |
| 730 | GO:0060433               | bronchus development                                                               |
| 731 | GO:0004738               | pyruvate dehydrogenase activity                                                    |
| 732 | GO:0043268               | positive regulation of potassium ion transport                                     |
| 733 | GO:0022409               | positive regulation of cell-cell adhesion                                          |
| 734 | GO:0031404               | chloride ion binding                                                               |
| 735 | GO:0060768               | regulation of epithelial cell proliferation involved in prostate gland development |
| 736 | GO:0019054               | modulation by virus of host process                                                |
| 737 | GO:0021631               | optic nerve morphogenesis                                                          |
| 738 | GO:0061003               | positive regulation of dendritic spine morphogenesis                               |
| 739 | GO:0050811               | GABA receptor binding                                                              |
| 740 | GO:0071575               | integral component of external side of plasma membrane                             |
| 741 | GO:0010834               | telomere maintenance via telomere shortening                                       |
| 742 | GO:0051298               | centrosome duplication                                                             |
| 743 | GO:0071460               | cellular response to cell-matrix adhesion                                          |
| 744 | GO:0051382               | kinetochore assembly                                                               |
| 745 | GO:0015036               | disulfide oxidoreductase activity                                                  |
| 746 | GO:1901888               | regulation of cell junction assembly                                               |

|     |                               |                                                                           |
|-----|-------------------------------|---------------------------------------------------------------------------|
| 747 | GO:0006281                    | DNA repair                                                                |
| 748 | GO:0001780                    | neutrophil homeostasis                                                    |
| 749 | GO:0060687                    | regulation of branching involved in prostate gland morphogenesis          |
| 750 | GO:0017157                    | regulation of exocytosis                                                  |
| 751 | GO:0043084                    | penile erection                                                           |
| 752 | GO:0006344                    | maintenance of chromatin silencing                                        |
| 753 | GO:0015886                    | heme transport                                                            |
| 754 | GO:0006705                    | mineralocorticoid biosynthetic process                                    |
| 755 | GO:0060406                    | positive regulation of penile erection                                    |
| 756 | GO:0033177                    | proton-transporting two-sector ATPase complex, proton-transporting domain |
| 757 | GO:0043008                    | ATP-dependent protein binding                                             |
| 758 | GO:0030414                    | peptidase inhibitor activity                                              |
| 759 | GO:0032456                    | endocytic recycling                                                       |
| 760 | GO:0072054                    | renal outer medulla development                                           |
| 761 | GO:0006086                    | acetyl-CoA biosynthetic process from pyruvate                             |
| 762 | GO:0007346                    | regulation of mitotic cell cycle                                          |
| 763 | GO:0002830                    | positive regulation of type 2 immune response                             |
| 764 | GO:0032420                    | stereocilium                                                              |
| 765 | GO:0045820                    | negative regulation of glycolysis                                         |
| 766 | GO:0005793                    | endoplasmic reticulum-Golgi intermediate compartment                      |
| 767 | GO:0006471                    | protein ADP-ribosylation                                                  |
| 768 | GO:0035641                    | locomotory exploration behavior                                           |
| 769 | GO:0000785                    | chromatin                                                                 |
| 770 | GO:0002429                    | immune response-activating cell surface receptor signaling pathway        |
| 771 | GO:0021527                    | spinal cord association neuron differentiation                            |
| 772 | GO:0007080                    | mitotic metaphase plate congression                                       |
| 773 | GO:0010592                    | positive regulation of lamellipodium assembly                             |
| 774 | GO:0060066                    | oviduct development                                                       |
| 775 | GO:0031666                    | positive regulation of lipopolysaccharide-mediated signaling pathway      |
| 776 | GO:0045835                    | negative regulation of meiosis                                            |
| 777 | KEGG:Phenylalanine_metabolism |                                                                           |
| 778 | GO:0006887                    | exocytosis                                                                |
| 779 | GO:0070849                    | response to epidermal growth factor                                       |
| 780 | GO:0048038                    | quinone binding                                                           |
| 781 | GO:0030492                    | hemoglobin binding                                                        |
| 782 | GO:0061299                    | retina vasculature morphogenesis in camera-type eye                       |
| 783 | GO:0070584                    | mitochondrion morphogenesis                                               |
| 784 | GO:0006408                    | snRNA export from nucleus                                                 |

|     |            |                                                                                              |
|-----|------------|----------------------------------------------------------------------------------------------|
| 785 | GO:0010469 | regulation of receptor activity                                                              |
| 786 | GO:0004518 | nuclease activity                                                                            |
| 787 | GO:0007010 | cytoskeleton organization                                                                    |
| 788 | GO:0044088 | regulation of vacuole organization                                                           |
| 789 | GO:0097194 | execution phase of apoptosis                                                                 |
| 790 | GO:0045254 | pyruvate dehydrogenase complex                                                               |
| 791 | GO:0030238 | male sex determination                                                                       |
| 792 | GO:0051537 | 2 iron, 2 sulfur cluster binding                                                             |
| 793 | GO:0004129 | cytochrome-c oxidase activity                                                                |
| 794 | GO:0072053 | renal inner medulla development                                                              |
| 795 | GO:0005639 | integral component of nuclear inner membrane                                                 |
| 796 | GO:0034750 | Scrib-APC-beta-catenin complex                                                               |
| 797 | GO:0006801 | superoxide metabolic process                                                                 |
| 798 | GO:0030279 | negative regulation of ossification                                                          |
| 799 | GO:0019213 | deacetylase activity                                                                         |
| 800 | GO:1900006 | positive regulation of dendrite development                                                  |
| 801 | GO:0002443 | leukocyte mediated immunity                                                                  |
| 802 | GO:0036270 | response to diuretic                                                                         |
| 803 | GO:0051928 | positive regulation of calcium ion transport                                                 |
| 804 | GO:0042826 | histone deacetylase binding                                                                  |
| 805 | GO:1901558 | response to metformin                                                                        |
| 806 | GO:0002523 | leukocyte migration involved in inflammatory response                                        |
| 807 | GO:0000938 | GARP complex                                                                                 |
| 808 | GO:0032990 | cell part morphogenesis                                                                      |
| 809 | GO:0005540 | hyaluronic acid binding                                                                      |
| 810 | GO:0005159 | insulin-like growth factor receptor binding                                                  |
| 811 | GO:0097062 | dendritic spine maintenance                                                                  |
| 812 | GO:2000146 | negative regulation of cell motility                                                         |
| 813 | GO:0031340 | positive regulation of vesicle fusion                                                        |
| 814 | GO:0001820 | serotonin secretion                                                                          |
| 815 | GO:0045732 | positive regulation of protein catabolic process                                             |
| 816 | GO:0032288 | myelin assembly                                                                              |
| 817 | GO:0032039 | integrator complex                                                                           |
| 818 | GO:0031932 | TORC2 complex                                                                                |
| 819 | GO:0033005 | positive regulation of mast cell activation                                                  |
| 820 | GO:0045095 | keratin filament                                                                             |
| 821 | GO:0050699 | WW domain binding                                                                            |
| 822 | GO:0019725 | cellular homeostasis                                                                         |
| 823 | GO:0032052 | bile acid binding                                                                            |
| 824 | GO:0002385 | mucosal immune response                                                                      |
| 825 | GO:1902177 | positive regulation of intrinsic apoptotic signaling pathway in response to oxidative stress |

|     |                                      |                                                                   |
|-----|--------------------------------------|-------------------------------------------------------------------|
| 826 | GO:0060978                           | angiogenesis involved in coronary vascular morphogenesis          |
| 827 | GO:0072218                           | metanephric ascending thin limb development                       |
| 828 | GO:0022891                           | substrate-specific transmembrane transporter activity             |
| 829 | GO:0006974                           | cellular response to DNA damage stimulus                          |
| 830 | KEGG:Sulfur_metabolism               |                                                                   |
| 831 | GO:0071402                           | cellular response to lipoprotein particle stimulus                |
| 832 | GO:0008190                           | eukaryotic initiation factor 4E binding                           |
| 833 | GO:0017151                           | DEAD/H-box RNA helicase binding                                   |
| 834 | GO:0097038                           | perinuclear endoplasmic reticulum                                 |
| 835 | GO:0070306                           | lens fiber cell differentiation                                   |
| 836 | GO:0030295                           | protein kinase activator activity                                 |
| 837 | GO:0001848                           | complement binding                                                |
| 838 | GO:0043313                           | regulation of neutrophil degranulation                            |
| 839 | GO:0006405                           | RNA export from nucleus                                           |
| 840 | GO:0001829                           | trophoblast cell differentiation                                  |
| 841 | GO:0035932                           | aldosterone secretion                                             |
| 842 | GO:2000008                           | regulation of protein localization to cell surface                |
| 843 | GO:0051539                           | 4 iron, 4 sulfur cluster binding                                  |
| 844 | GO:0060627                           | regulation of vesicle-mediated transport                          |
| 845 | GO:0030674                           | protein binding, bridging                                         |
| 846 | GO:0042719                           | mitochondrial intermembrane space protein transporter complex     |
| 847 | GO:0007097                           | nuclear migration                                                 |
| 848 | GO:0045622                           | regulation of T-helper cell differentiation                       |
| 849 | GO:0003344                           | pericardium morphogenesis                                         |
| 850 | GO:0000050                           | urea cycle                                                        |
| 851 | GO:0005795                           | Golgi stack                                                       |
| 852 | GO:0016035                           | zeta DNA polymerase complex                                       |
| 853 | GO:0030185                           | nitric oxide transport                                            |
| 854 | GO:0033269                           | internode region of axon                                          |
| 855 | KEGG:Arginine_and_proline_metabolism |                                                                   |
| 856 | GO:0015884                           | folic acid transport                                              |
| 857 | GO:0051018                           | protein kinase A binding                                          |
| 858 | GO:0033179                           | proton-transporting V-type ATPase, V0 domain                      |
| 859 | GO:0070182                           | DNA polymerase binding                                            |
| 860 | GO:2000655                           | negative regulation of cellular response to testosterone stimulus |
| 861 | GO:0060789                           | hair follicle placode formation                                   |
| 862 | GO:0030382                           | sperm mitochondrion organization                                  |
| 863 | GO:0005319                           | lipid transporter activity                                        |
| 864 | GO:0035374                           | chondroitin sulfate binding                                       |

|     |                                   |                                                                           |
|-----|-----------------------------------|---------------------------------------------------------------------------|
| 865 | GO:0002366                        | leukocyte activation involved in immune response                          |
| 866 | KEGG:Fatty_acid_metabolism        |                                                                           |
| 867 | GO:0005742                        | mitochondrial outer membrane translocase complex                          |
| 868 | GO:0005826                        | actomyosin contractile ring                                               |
| 869 | GO:0006880                        | intracellular sequestering of iron ion                                    |
| 870 | GO:0060384                        | innervation                                                               |
| 871 | GO:0043178                        | alcohol binding                                                           |
| 872 | GO:0015226                        | carnitine transmembrane transporter activity                              |
| 873 | GO:0010524                        | positive regulation of calcium ion transport into cytosol                 |
| 874 | GO:0060296                        | regulation of cilium beat frequency involved in ciliary motility          |
| 875 | GO:0045026                        | plasma membrane fusion                                                    |
| 876 | GO:0043231                        | intracellular membrane-bounded organelle                                  |
| 877 | GO:1901661                        | quinone metabolic process                                                 |
| 878 | GO:0090129                        | positive regulation of synapse maturation                                 |
| 879 | GO:0045780                        | positive regulation of bone resorption                                    |
| 880 | GO:0042255                        | ribosome assembly                                                         |
| 881 | GO:0060197                        | cloacal septation                                                         |
| 882 | GO:0017076                        | purine nucleotide binding                                                 |
| 883 | GO:0016192                        | vesicle-mediated transport                                                |
| 884 | GO:0051604                        | protein maturation                                                        |
| 885 | GO:0070971                        | endoplasmic reticulum exit site                                           |
| 886 | GO:0060369                        | positive regulation of Fc receptor mediated stimulatory signaling pathway |
| 887 | GO:0046415                        | urate metabolic process                                                   |
| 888 | KEGG:Glycolysis___Gluconeogenesis |                                                                           |
| 889 | GO:0008278                        | cohesin complex                                                           |
| 890 | GO:0051654                        | establishment of mitochondrion localization                               |
| 891 | GO:0060997                        | dendritic spine morphogenesis                                             |
| 892 | GO:0007176                        | regulation of epidermal growth factor-activated receptor activity         |
| 893 | GO:0005087                        | Ran guanyl-nucleotide exchange factor activity                            |
| 894 | GO:0034663                        | endoplasmic reticulum chaperone complex                                   |
| 895 | GO:0042713                        | sperm ejaculation                                                         |
| 896 | GO:0070938                        | contractile ring                                                          |
| 897 | GO:0060741                        | prostate gland stromal morphogenesis                                      |
| 898 | GO:0042277                        | peptide binding                                                           |
| 899 | GO:0071933                        | Arp2/3 complex binding                                                    |
| 900 | GO:0051280                        | negative regulation of release of sequestered calcium ion into cytosol    |
| 901 | GO:0008298                        | intracellular mRNA localization                                           |

|     |            |                                                                        |
|-----|------------|------------------------------------------------------------------------|
| 902 | GO:0018271 | biotin-protein ligase activity                                         |
| 903 | GO:0007625 | grooming behavior                                                      |
| 904 | GO:0005614 | interstitial matrix                                                    |
| 905 | GO:0005851 | eukaryotic translation initiation factor 2B complex                    |
| 906 | GO:0050855 | regulation of B cell receptor signaling pathway                        |
| 907 | GO:0072205 | metanephric collecting duct development                                |
| 908 | GO:0048806 | genitalia development                                                  |
| 909 | GO:0051051 | negative regulation of transport                                       |
| 910 | GO:0001773 | myeloid dendritic cell activation                                      |
| 911 | GO:0004667 | prostaglandin-D synthase activity                                      |
| 912 | GO:0045665 | negative regulation of neuron differentiation                          |
| 913 | GO:0051347 | positive regulation of transferase activity                            |
| 914 | GO:0048598 | embryonic morphogenesis                                                |
| 915 | GO:0005883 | neurofilament                                                          |
| 916 | GO:0019969 | interleukin-10 binding                                                 |
| 917 | GO:0060664 | epithelial cell proliferation involved in salivary gland morphogenesis |
| 918 | GO:0000421 | autophagic vacuole membrane                                            |
| 919 | GO:0004887 | thyroid hormone receptor activity                                      |
| 920 | GO:0034399 | nuclear periphery                                                      |
| 921 | GO:0031616 | spindle pole centrosome                                                |
| 922 | GO:0019884 | antigen processing and presentation of exogenous antigen               |
| 923 | GO:0072657 | protein localization to membrane                                       |
| 924 | GO:0007049 | cell cycle                                                             |
| 925 | GO:0008146 | sulfotransferase activity                                              |
| 926 | GO:0042788 | polysomal ribosome                                                     |
| 927 | GO:0097320 | membrane tubulation                                                    |
| 928 | GO:0016572 | histone phosphorylation                                                |
| 929 | GO:0006703 | estrogen biosynthetic process                                          |
| 930 | GO:0033558 | protein deacetylase activity                                           |
| 931 | GO:0003162 | atrioventricular node development                                      |
| 932 | GO:0003161 | cardiac conduction system development                                  |
| 933 | GO:0019216 | regulation of lipid metabolic process                                  |
| 934 | GO:0035794 | positive regulation of mitochondrial membrane permeability             |
| 935 | GO:0030120 | vesicle coat                                                           |
| 936 | GO:0016023 | cytoplasmic membrane-bounded vesicle                                   |
| 937 | GO:0032091 | negative regulation of protein binding                                 |
| 938 | GO:0014047 | glutamate secretion                                                    |
| 939 | GO:0009792 | embryo development ending in birth or egg hatching                     |
| 940 | GO:0043219 | lateral loop                                                           |

|     |                                |                                                                                                       |
|-----|--------------------------------|-------------------------------------------------------------------------------------------------------|
| 941 | GO:0060438                     | trachea development                                                                                   |
| 942 | GO:0044615                     | nuclear pore nuclear basket                                                                           |
| 943 | GO:0042272                     | nuclear RNA export factor complex                                                                     |
| 944 | GO:0005762                     | mitochondrial large ribosomal subunit                                                                 |
| 945 | GO:0034447                     | very-low-density lipoprotein particle clearance                                                       |
| 946 | GO:0046980                     | tapasin binding                                                                                       |
| 947 | KEGG:Citrate_cycle__TCA_cycle_ |                                                                                                       |
| 948 | GO:0008537                     | proteasome activator complex                                                                          |
| 949 | GO:0030048                     | actin filament-based movement                                                                         |
| 950 | GO:0007288                     | sperm axoneme assembly                                                                                |
| 951 | GO:0009880                     | embryonic pattern specification                                                                       |
| 952 | GO:0021854                     | hypothalamus development                                                                              |
| 953 | GO:0008200                     | ion channel inhibitor activity                                                                        |
| 954 | GO:0060157                     | urinary bladder development                                                                           |
| 955 | GO:0031016                     | pancreas development                                                                                  |
| 956 | KEGG:Biotin_metabolism         |                                                                                                       |
| 957 | GO:0016620                     | oxidoreductase activity, acting on the aldehyde<br>or oxo group of donors, NAD or NADP as<br>acceptor |
| 958 | GO:0046814                     | coreceptor-mediated virion attachment to host<br>cell                                                 |
| 959 | GO:0047485                     | protein N-terminus binding                                                                            |
| 960 | GO:0042997                     | negative regulation of Golgi to plasma<br>membrane protein transport                                  |
| 961 | KEGG:Riboflavin_metabolism     |                                                                                                       |
| 962 | GO:0002693                     | positive regulation of cellular extravasation                                                         |
| 963 | GO:0019694                     | alkanesulfonate metabolic process                                                                     |
| 964 | GO:0071756                     | pentameric IgM immunoglobulin complex                                                                 |
| 965 | GO:0006730                     | one-carbon metabolic process                                                                          |
| 966 | GO:0071817                     | MMXD complex                                                                                          |
| 967 | GO:0060056                     | mammary gland involution                                                                              |
| 968 | GO:1900029                     | positive regulation of ruffle assembly                                                                |
| 969 | GO:0005746                     | mitochondrial respiratory chain                                                                       |
| 970 | KEGG:p53_signaling_pathway     |                                                                                                       |
| 971 | GO:0009236                     | cobalamin biosynthetic process                                                                        |
| 972 | GO:0008354                     | germ cell migration                                                                                   |
| 973 | GO:0090190                     | positive regulation of branching involved in<br>ureteric bud morphogenesis                            |
| 974 | GO:0030992                     | intraciliary transport particle B                                                                     |
| 975 | GO:0045762                     | positive regulation of adenylate cyclase activity                                                     |
| 976 | GO:0008517                     | folic acid transporter activity                                                                       |
| 977 | GO:0060968                     | regulation of gene silencing                                                                          |
| 978 | GO:0051205                     | protein insertion into membrane                                                                       |
| 979 | GO:0016239                     | positive regulation of macroautophagy                                                                 |

|      |            |                                                                           |
|------|------------|---------------------------------------------------------------------------|
| 980  | GO:0002193 | MAML1-RBP-Jkappa- ICN1 complex                                            |
| 981  | GO:0048535 | lymph node development                                                    |
| 982  | GO:0050806 | positive regulation of synaptic transmission                              |
| 983  | GO:0042405 | nuclear inclusion body                                                    |
| 984  | GO:0031838 | haptoglobin-hemoglobin complex                                            |
| 985  | GO:0043305 | negative regulation of mast cell degranulation                            |
| 986  | GO:0003160 | endocardium morphogenesis                                                 |
| 987  | GO:0014010 | Schwann cell proliferation                                                |
| 988  | GO:2000808 | negative regulation of synaptic vesicle clustering                        |
| 989  | GO:2000678 | negative regulation of transcription regulatory region DNA binding        |
| 990  | GO:0005903 | brush border                                                              |
| 991  | GO:0046661 | male sex differentiation                                                  |
| 992  | GO:0050777 | negative regulation of immune response                                    |
| 993  | GO:0045927 | positive regulation of growth                                             |
| 994  | GO:0021794 | thalamus development                                                      |
| 995  | GO:0019955 | cytokine binding                                                          |
| 996  | GO:0060548 | negative regulation of cell death                                         |
| 997  | GO:0033025 | regulation of mast cell apoptotic process                                 |
| 998  | GO:2000121 | regulation of removal of superoxide radicals                              |
| 999  | GO:1901303 | negative regulation of cargo loading into COPII-coated vesicle            |
| 1000 | GO:0043495 | protein anchor                                                            |
| 1001 | GO:0035095 | behavioral response to nicotine                                           |
| 1002 | GO:0008170 | N-methyltransferase activity                                              |
| 1003 | GO:0021915 | neural tube development                                                   |
| 1004 | GO:0046878 | positive regulation of saliva secretion                                   |
| 1005 | GO:0060916 | mesenchymal cell proliferation involved in lung development               |
| 1006 | GO:0031298 | replication fork protection complex                                       |
| 1007 | GO:0000777 | condensed chromosome kinetochore                                          |
| 1008 | GO:0033197 | response to vitamin E                                                     |
| 1009 | GO:0008428 | ribonuclease inhibitor activity                                           |
| 1010 | GO:0014808 | release of sequestered calcium ion into cytosol by sarcoplasmic reticulum |
| 1011 | GO:0022624 | proteasome accessory complex                                              |
| 1012 | GO:0046625 | sphingolipid binding                                                      |
| 1013 | GO:0030218 | erythrocyte differentiation                                               |
| 1014 | GO:0050832 | defense response to fungus                                                |
| 1015 | GO:0008328 | ionotropic glutamate receptor complex                                     |
| 1016 | GO:0006099 | tricarboxylic acid cycle                                                  |
| 1017 | GO:0021702 | cerebellar Purkinje cell differentiation                                  |
| 1018 | GO:0051595 | response to methylglyoxal                                                 |



|      |                                                  |                                                                               |
|------|--------------------------------------------------|-------------------------------------------------------------------------------|
| 1019 | GO:0006110                                       | regulation of glycolysis                                                      |
| 1020 | GO:2000641                                       | regulation of early endosome to late endosome transport                       |
| 1021 | GO:0048286                                       | lung alveolus development                                                     |
| 1022 | GO:0000904                                       | cell morphogenesis involved in differentiation                                |
| 1023 | GO:0019222                                       | regulation of metabolic process                                               |
| 1024 | GO:0030878                                       | thyroid gland development                                                     |
| 1025 | GO:0005083                                       | small GTPase regulator activity                                               |
| 1026 | GO:0046697                                       | decidualization                                                               |
| 1027 | GO:0048840                                       | otolith development                                                           |
| 1028 | GO:0060710                                       | chorio-allantoic fusion                                                       |
| 1029 | GO:0045778                                       | positive regulation of ossification                                           |
| 1030 | GO:0043488                                       | regulation of mRNA stability                                                  |
| 1031 | KEGG:Glycine_serine_and_threonine_m<br>etabolism |                                                                               |
| 1032 | GO:0034341                                       | response to interferon-gamma                                                  |
| 1033 | GO:0039689                                       | negative stranded viral RNA replication                                       |
| 1034 | KEGG:Oxidative_phosphorylation                   |                                                                               |
| 1035 | GO:0016876                                       | ligase activity, forming aminoacyl-tRNA and related compounds                 |
| 1036 | GO:0019208                                       | phosphatase regulator activity                                                |
| 1037 | GO:0007156                                       | homophilic cell adhesion                                                      |
| 1038 | GO:1900025                                       | negative regulation of substrate adhesion-dependent cell spreading            |
| 1039 | GO:0090170                                       | regulation of Golgi inheritance                                               |
| 1040 | GO:0005586                                       | collagen type III                                                             |
| 1041 | GO:0001771                                       | immunological synapse formation                                               |
| 1042 | GO:0005089                                       | Rho guanyl-nucleotide exchange factor activity                                |
| 1043 | GO:0071748                                       | monomeric IgA immunoglobulin complex                                          |
| 1044 | GO:0048644                                       | muscle organ morphogenesis                                                    |
| 1045 | GO:0001893                                       | maternal placenta development                                                 |
| 1046 | GO:0000083                                       | regulation of transcription involved in G1/S transition of mitotic cell cycle |
| 1047 | GO:0034103                                       | regulation of tissue remodeling                                               |
| 1048 | GO:0008043                                       | intracellular ferritin complex                                                |
| 1049 | GO:0033674                                       | positive regulation of kinase activity                                        |
| 1050 | KEGG:Aminoacyl_tRNA_biosynthesis                 |                                                                               |
| 1051 | GO:0021517                                       | ventral spinal cord development                                               |
| 1052 | GO:0005520                                       | insulin-like growth factor binding                                            |
| 1053 | GO:0048069                                       | eye pigmentation                                                              |
| 1054 | GO:0042596                                       | fear response                                                                 |
| 1055 | GO:1901203                                       | positive regulation of extracellular matrix assembly                          |
| 1056 | GO:0002513                                       | tolerance induction to self antigen                                           |

|      |                  |                                                                                                                  |
|------|------------------|------------------------------------------------------------------------------------------------------------------|
| 1057 | GO:0019907       | cyclin-dependent protein kinase activating<br>kinase holoenzyme complex                                          |
| 1058 | GO:0046677       | response to antibiotic                                                                                           |
| 1059 | GO:0032836       | glomerular basement membrane development                                                                         |
| 1060 | GO:0043589       | skin morphogenesis                                                                                               |
| 1061 | GO:0031503       | protein complex localization                                                                                     |
| 1062 | GO:0060425       | lung morphogenesis                                                                                               |
| 1063 | GO:0031090       | organelle membrane                                                                                               |
| 1064 | GO:0080111       | DNA demethylation                                                                                                |
| 1065 | GO:0006914       | autophagy                                                                                                        |
| 1066 | GO:0050804       | regulation of synaptic transmission                                                                              |
| 1067 | GO:0001540       | beta-amyloid binding                                                                                             |
| 1068 | GO:0048496       | maintenance of organ identity                                                                                    |
| 1069 | GO:0001778       | plasma membrane repair                                                                                           |
| 1070 | GO:0035625       | epidermal growth factor-activated receptor<br>transactivation by G-protein coupled receptor<br>signaling pathway |
| 1071 | GO:0090073       | positive regulation of protein homodimerization<br>activity                                                      |
| 1072 | GO:0051683       | establishment of Golgi localization                                                                              |
| 1073 | GO:2000774       | positive regulation of cellular senescence                                                                       |
| 1074 | GO:0060440       | trachea formation                                                                                                |
| 1075 | GO:0060023       | soft palate development                                                                                          |
| 1076 | GO:0060323       | head morphogenesis                                                                                               |
| 1077 | GO:0010466       | negative regulation of peptidase activity                                                                        |
| 1078 | GO:0022029       | telencephalon cell migration                                                                                     |
| 1079 | GO:0010884       | positive regulation of lipid storage                                                                             |
| 1080 | GO:0060113       | inner ear receptor cell differentiation                                                                          |
| 1081 | GO:0050808       | synapse organization                                                                                             |
| 1082 | GO:0061298       | retina vasculature development in camera-type<br>eye                                                             |
| 1083 | GO:0016208       | AMP binding                                                                                                      |
| 1084 | GO:0050877       | neurological system process                                                                                      |
| 1085 | GO:0090003       | regulation of establishment of protein<br>localization to plasma membrane                                        |
| 1086 | GO:0032119       | sequestering of zinc ion                                                                                         |
| 1087 | GO:0060008       | Sertoli cell differentiation                                                                                     |
| 1088 | GO:0010447       | response to acidity                                                                                              |
| 1089 | GO:0048168       | regulation of neuronal synaptic plasticity                                                                       |
| 1090 | GO:0030030       | cell projection organization                                                                                     |
| 1091 | GO:0005740       | mitochondrial envelope                                                                                           |
| 1092 | KEGG:Endocytosis |                                                                                                                  |
| 1093 | GO:1901214       | regulation of neuron death                                                                                       |
| 1094 | GO:0060915       | mesenchymal cell differentiation involved in                                                                     |

|      |                                                |                                                          |
|------|------------------------------------------------|----------------------------------------------------------|
| 1095 | GO:0021756                                     | lung development                                         |
| 1096 | GO:0090071                                     | striatum development                                     |
| 1097 | GO:0006139                                     | negative regulation of ribosome biogenesis               |
| 1098 | GO:0043032                                     | nucleobase-containing compound metabolic process         |
| 1099 | GO:2001014                                     | positive regulation of macrophage activation             |
| 1100 | KEGG:Antigen_processing_and_presentation       | regulation of skeletal muscle cell differentiation       |
| 1101 | GO:0008582                                     | regulation of synaptic growth at neuromuscular junction  |
| 1102 | GO:0070937                                     | CRD-mediated mRNA stability complex                      |
| 1103 | GO:0005844                                     | polysome                                                 |
| 1104 | GO:0033151                                     | V(D)J recombination                                      |
| 1105 | GO:0060055                                     | angiogenesis involved in wound healing                   |
| 1106 | GO:0051149                                     | positive regulation of muscle cell differentiation       |
| 1107 | GO:0042908                                     | xenobiotic transport                                     |
| 1108 | GO:1900180                                     | regulation of protein localization to nucleus            |
| 1109 | GO:0060053                                     | neurofilament cytoskeleton                               |
| 1110 | GO:0005006                                     | epidermal growth factor-activated receptor activity      |
| 1111 | GO:0071773                                     | cellular response to BMP stimulus                        |
| 1112 | KEGG:SNARE_interactions_in_vesicular_transport |                                                          |
| 1113 | GO:0010887                                     | negative regulation of cholesterol storage               |
| 1114 | GO:0001568                                     | blood vessel development                                 |
| 1115 | GO:0002418                                     | immune response to tumor cell                            |
| 1116 | GO:0050544                                     | arachidonic acid binding                                 |
| 1117 | GO:0035268                                     | protein mannosylation                                    |
| 1118 | GO:0015889                                     | cobalamin transport                                      |
| 1119 | GO:0042641                                     | actomyosin                                               |
| 1120 | GO:0060044                                     | negative regulation of cardiac muscle cell proliferation |
| 1121 | GO:0048246                                     | macrophage chemotaxis                                    |
| 1122 | GO:0001818                                     | negative regulation of cytokine production               |
| 1123 | GO:0046889                                     | positive regulation of lipid biosynthetic process        |
| 1124 | GO:0043171                                     | peptide catabolic process                                |
| 1125 | GO:0060615                                     | mammary gland bud formation                              |
| 1126 | GO:0046621                                     | negative regulation of organ growth                      |
| 1127 | GO:0051444                                     | negative regulation of ubiquitin-protein ligase activity |
| 1128 | GO:0045786                                     | negative regulation of cell cycle                        |
| 1129 | GO:0017025                                     | TBP-class protein binding                                |
| 1130 | GO:0022604                                     | regulation of cell morphogenesis                         |

|      |            |                                                                 |
|------|------------|-----------------------------------------------------------------|
| 1131 | GO:0031083 | BLOC-1 complex                                                  |
| 1132 | GO:0042953 | lipoprotein transport                                           |
| 1133 | GO:0031536 | positive regulation of exit from mitosis                        |
| 1134 | GO:0032602 | chemokine production                                            |
| 1135 | GO:0051489 | regulation of filopodium assembly                               |
| 1136 | GO:0001654 | eye development                                                 |
| 1137 | GO:0048807 | female genitalia morphogenesis                                  |
| 1138 | GO:0046005 | positive regulation of circadian sleep/wake cycle, REM sleep    |
| 1139 | GO:0005539 | glycosaminoglycan binding                                       |
| 1140 | GO:0046703 | natural killer cell lectin-like receptor binding                |
| 1141 | GO:0002368 | B cell cytokine production                                      |
| 1142 | GO:0033391 | chromatoid body                                                 |
| 1143 | GO:0060685 | regulation of prostatic bud formation                           |
| 1144 | GO:0010812 | negative regulation of cell-substrate adhesion                  |
| 1145 | GO:2000521 | negative regulation of immunological synapse formation          |
| 1146 | GO:0042448 | progesterone metabolic process                                  |
| 1147 | GO:0016684 | oxidoreductase activity, acting on peroxide as acceptor         |
| 1148 | GO:0007275 | multicellular organismal development                            |
| 1149 | GO:0006903 | vesicle targeting                                               |
| 1150 | GO:0035166 | post-embryonic hemopoiesis                                      |
| 1151 | GO:0042923 | neuropeptide binding                                            |
| 1152 | GO:0071158 | positive regulation of cell cycle arrest                        |
| 1153 | GO:2001214 | positive regulation of vasculogenesis                           |
| 1154 | GO:0030672 | synaptic vesicle membrane                                       |
| 1155 | GO:0048193 | Golgi vesicle transport                                         |
| 1156 | GO:0005677 | chromatin silencing complex                                     |
| 1157 | GO:0032133 | chromosome passenger complex                                    |
| 1158 | GO:0007417 | central nervous system development                              |
| 1159 | GO:2000172 | regulation of branching morphogenesis of a nerve                |
| 1160 | GO:0007194 | negative regulation of adenylate cyclase activity               |
| 1161 | GO:0004839 | ubiquitin activating enzyme activity                            |
| 1162 | GO:0032526 | response to retinoic acid                                       |
| 1163 | GO:0048145 | regulation of fibroblast proliferation                          |
| 1164 | GO:0039534 | negative regulation of MDA-5 signaling pathway                  |
| 1165 | GO:0043199 | sulfate binding                                                 |
| 1166 | GO:0045737 | positive regulation of cyclin-dependent protein kinase activity |
| 1167 | GO:0034988 | Fc-gamma receptor I complex binding                             |
| 1168 | GO:0001675 | acrosome assembly                                               |

|      |                           |                                                                 |
|------|---------------------------|-----------------------------------------------------------------|
| 1169 | GO:0043392                | negative regulation of DNA binding                              |
| 1170 | GO:0060492                | lung induction                                                  |
| 1171 | GO:0030984                | kininogen binding                                               |
| 1172 | GO:0071664                | catenin-TCF7L2 complex                                          |
| 1173 | GO:0045926                | negative regulation of growth                                   |
| 1174 | GO:0061047                | positive regulation of branching involved in lung morphogenesis |
| 1175 | GO:0031529                | ruffle organization                                             |
| 1176 | GO:0021533                | cell differentiation in hindbrain                               |
| 1177 | GO:0042633                | hair cycle                                                      |
| 1178 | GO:0001542                | ovulation from ovarian follicle                                 |
| 1179 | GO:0002079                | inner acrosomal membrane                                        |
| 1180 | GO:0015130                | mevalonate transmembrane transporter activity                   |
| 1181 | GO:0046626                | regulation of insulin receptor signaling pathway                |
| 1182 | GO:0005057                | receptor signaling protein activity                             |
| 1183 | KEGG:Histidine_metabolism |                                                                 |
| 1184 | GO:0016461                | unconventional myosin complex                                   |
| 1185 | GO:0048557                | embryonic digestive tract morphogenesis                         |
| 1186 | GO:0034185                | apolipoprotein binding                                          |
| 1187 | GO:0039536                | negative regulation of RIG-I signaling pathway                  |
| 1188 | GO:0070442                | alphaIIb-beta3 integrin complex                                 |
| 1189 | GO:0046951                | ketone body biosynthetic process                                |
| 1190 | GO:0070369                | beta-catenin-TCF7L2 complex                                     |
| 1191 | GO:0005783                | endoplasmic reticulum                                           |
| 1192 | GO:0008228                | opsonization                                                    |
| 1193 | GO:0032467                | positive regulation of cytokinesis                              |
| 1194 | GO:0097433                | dense body                                                      |
| 1195 | GO:0036053                | glomerular endothelium fenestra                                 |
| 1196 | GO:0007031                | peroxisome organization                                         |
| 1197 | GO:0009081                | branched-chain amino acid metabolic process                     |
| 1198 | GO:0007621                | negative regulation of female receptivity                       |
| 1199 | GO:0051294                | establishment of spindle orientation                            |
| 1200 | GO:0043086                | negative regulation of catalytic activity                       |
| 1201 | GO:0090343                | positive regulation of cell aging                               |
| 1202 | GO:0072572                | poly-ADP-D-ribose binding                                       |
| 1203 | GO:0060479                | lung cell differentiation                                       |
| 1204 | GO:0048738                | cardiac muscle tissue development                               |
| 1205 | GO:0046833                | positive regulation of RNA export from nucleus                  |
| 1206 | GO:0097177                | mitochondrial ribosome binding                                  |
| 1207 | GO:0030595                | leukocyte chemotaxis                                            |
| 1208 | GO:0050920                | regulation of chemotaxis                                        |
| 1209 | GO:0031667                | response to nutrient levels                                     |
| 1210 | KEGG:Huntington_s_disease |                                                                 |
| 1211 | GO:0070984                | SET domain binding                                              |

|      |                             |                                                                                         |
|------|-----------------------------|-----------------------------------------------------------------------------------------|
| 1212 | GO:0045475                  | locomotor rhythm                                                                        |
| 1213 | GO:0048808                  | male genitalia morphogenesis                                                            |
| 1214 | GO:0035112                  | genitalia morphogenesis                                                                 |
| 1215 | GO:1900035                  | negative regulation of cellular response to heat                                        |
| 1216 | GO:0030261                  | chromosome condensation                                                                 |
| 1217 | GO:0031259                  | uropod membrane                                                                         |
| 1218 | GO:0043433                  | negative regulation of sequence-specific DNA binding transcription factor activity      |
| 1219 | GO:0007136                  | meiotic prophase II                                                                     |
| 1220 | GO:0008060                  | ARF GTPase activator activity                                                           |
| 1221 | GO:0017077                  | oxidative phosphorylation uncoupler activity                                            |
| 1222 | GO:0032880                  | regulation of protein localization                                                      |
| 1223 | GO:0030517                  | negative regulation of axon extension                                                   |
| 1224 | KEGG:PPAR_signaling_pathway |                                                                                         |
| 1225 | GO:0032781                  | positive regulation of ATPase activity                                                  |
| 1226 | GO:0046658                  | anchored component of plasma membrane                                                   |
| 1227 | GO:0000165                  | MAPK cascade                                                                            |
| 1228 | GO:0031985                  | Golgi cisterna                                                                          |
| 1229 | GO:0008265                  | Mo-molybdopterin cofactor sulfurase activity                                            |
| 1230 | GO:0030902                  | hindbrain development                                                                   |
| 1231 | GO:0036396                  | MIS complex                                                                             |
| 1232 | GO:0031527                  | filopodium membrane                                                                     |
| 1233 | GO:0007158                  | neuron cell-cell adhesion                                                               |
| 1234 | GO:0097169                  | AIM2 inflammasome complex                                                               |
| 1235 | GO:0009966                  | regulation of signal transduction                                                       |
| 1236 | GO:0061384                  | heart trabecula morphogenesis                                                           |
| 1237 | GO:0016779                  | nucleotidyltransferase activity                                                         |
| 1238 | GO:0048592                  | eye morphogenesis                                                                       |
| 1239 | GO:0051495                  | positive regulation of cytoskeleton organization                                        |
| 1240 | GO:0010614                  | negative regulation of cardiac muscle hypertrophy                                       |
| 1241 | GO:0016811                  | hydrolase activity, acting on carbon-nitrogen (but not peptide) bonds, in linear amides |
| 1242 | GO:0046835                  | carbohydrate phosphorylation                                                            |
| 1243 | GO:0048646                  | anatomical structure formation involved in morphogenesis                                |
| 1244 | GO:0051208                  | sequestering of calcium ion                                                             |
| 1245 | GO:0010243                  | response to organonitrogen compound                                                     |
| 1246 | GO:0031406                  | carboxylic acid binding                                                                 |
| 1247 | GO:0046903                  | secretion                                                                               |
| 1248 | GO:0005846                  | nuclear cap binding complex                                                             |
| 1249 | GO:0007369                  | gastrulation                                                                            |
| 1250 | GO:0043545                  | molybdopterin cofactor metabolic process                                                |
| 1251 | GO:0071971                  | extracellular vesicular exosome assembly                                                |

|      |                                   |                                                                                               |
|------|-----------------------------------|-----------------------------------------------------------------------------------------------|
| 1252 | GO:0008287                        | protein serine/threonine phosphatase complex                                                  |
| 1253 | GO:0035265                        | organ growth                                                                                  |
| 1254 | GO:0043221                        | SMC family protein binding                                                                    |
| 1255 | GO:0051602                        | response to electrical stimulus                                                               |
| 1256 | GO:0015695                        | organic cation transport                                                                      |
| 1257 | GO:0043132                        | NAD transport                                                                                 |
| 1258 | KEGG:Linoleic_acid_metabolism     |                                                                                               |
| 1259 | GO:0070086                        | ubiquitin-dependent endocytosis                                                               |
| 1260 | GO:0097371                        | MDM2/MDM4 family protein binding                                                              |
| 1261 | GO:0021795                        | cerebral cortex cell migration                                                                |
| 1262 | GO:0036117                        | hyaluronon cable                                                                              |
| 1263 | GO:0010575                        | positive regulation vascular endothelial growth factor production                             |
| 1264 | GO:0009629                        | response to gravity                                                                           |
| 1265 | GO:0019060                        | intracellular transport of viral protein in host cell                                         |
| 1266 | GO:0031640                        | killing of cells of other organism                                                            |
| 1267 | GO:0032090                        | Pyrin domain binding                                                                          |
| 1268 | GO:0000781                        | chromosome, telomeric region                                                                  |
| 1269 | GO:0002076                        | osteoblast development                                                                        |
| 1270 | GO:0015645                        | fatty acid ligase activity                                                                    |
| 1271 | GO:0002090                        | regulation of receptor internalization                                                        |
| 1272 | GO:0003211                        | cardiac ventricle formation                                                                   |
| 1273 | GO:0045597                        | positive regulation of cell differentiation                                                   |
| 1274 | GO:0032996                        | Bcl3-Bcl10 complex                                                                            |
| 1275 | GO:0021986                        | habenula development                                                                          |
| 1276 | GO:0016624                        | oxidoreductase activity, acting on the aldehyde or oxo group of donors, disulfide as acceptor |
| 1277 | GO:1900038                        | negative regulation of cellular response to hypoxia                                           |
| 1278 | GO:0010841                        | positive regulation of circadian sleep/wake cycle, wakefulness                                |
| 1279 | GO:0061133                        | endopeptidase activator activity                                                              |
| 1280 | KEGG:Systemic_lupus_erythematosus |                                                                                               |
| 1281 | GO:0008601                        | protein phosphatase type 2A regulator activity                                                |
| 1282 | GO:0023051                        | regulation of signaling                                                                       |
| 1283 | KEGG:Lysine_biosynthesis          |                                                                                               |
| 1284 | GO:0005749                        | mitochondrial respiratory chain complex II                                                    |
| 1285 | GO:0051709                        | regulation of killing of cells of other organism                                              |
| 1286 | GO:0006662                        | glycerol ether metabolic process                                                              |
| 1287 | GO:0070988                        | demethylation                                                                                 |
| 1288 | GO:0021575                        | hindbrain morphogenesis                                                                       |
| 1289 | GO:0001657                        | ureteric bud development                                                                      |
| 1290 | GO:2001027                        | negative regulation of endothelial cell chemotaxis                                            |

|      |                             |                                                                                         |
|------|-----------------------------|-----------------------------------------------------------------------------------------|
| 1291 | GO:0000178                  | exosome (RNase complex)                                                                 |
| 1292 | GO:0051866                  | general adaptation syndrome                                                             |
| 1293 | KEGG:Thyroid_cancer         |                                                                                         |
| 1294 | GO:0001959                  | regulation of cytokine-mediated signaling pathway                                       |
| 1295 | GO:0006259                  | DNA metabolic process                                                                   |
| 1296 | GO:0051984                  | positive regulation of chromosome segregation                                           |
| 1297 | GO:0030362                  | protein phosphatase type 4 regulator activity                                           |
| 1298 | GO:0060463                  | lung lobe morphogenesis                                                                 |
| 1299 | GO:0016812                  | hydrolase activity, acting on carbon-nitrogen (but not peptide) bonds, in cyclic amides |
| 1300 | GO:0016226                  | iron-sulfur cluster assembly                                                            |
| 1301 | GO:0033026                  | negative regulation of mast cell apoptotic process                                      |
| 1302 | GO:0032900                  | negative regulation of neurotrophin production                                          |
| 1303 | GO:0097386                  | glial cell projection                                                                   |
| 1304 | GO:0001944                  | vasculature development                                                                 |
| 1305 | GO:0045682                  | regulation of epidermis development                                                     |
| 1306 | GO:0032449                  | CBM complex                                                                             |
| 1307 | GO:0090219                  | negative regulation of lipid kinase activity                                            |
| 1308 | GO:0045916                  | negative regulation of complement activation                                            |
| 1309 | GO:0019730                  | antimicrobial humoral response                                                          |
| 1310 | GO:0000303                  | response to superoxide                                                                  |
| 1311 | KEGG:Lipoic_acid_metabolism |                                                                                         |
| 1312 | GO:0003007                  | heart morphogenesis                                                                     |
| 1313 | GO:0000104                  | succinate dehydrogenase activity                                                        |
| 1314 | GO:0031010                  | ISWI-type complex                                                                       |
| 1315 | GO:0042982                  | amyloid precursor protein metabolic process                                             |
| 1316 | GO:0019897                  | extrinsic component of plasma membrane                                                  |
| 1317 | GO:0090249                  | regulation of cell motility involved in somitogenic axis elongation                     |
| 1318 | GO:0032797                  | SMN complex                                                                             |
| 1319 | GO:0002177                  | manchette                                                                               |
| 1320 | GO:0031102                  | neuron projection regeneration                                                          |
| 1321 | GO:0005685                  | U1 snRNP                                                                                |
| 1322 | GO:1900119                  | positive regulation of execution phase of apoptosis                                     |
| 1323 | GO:0005955                  | calcineurin complex                                                                     |
| 1324 | GO:0044254                  | multicellular organismal protein catabolic process                                      |
| 1325 | GO:1901216                  | positive regulation of neuron death                                                     |
| 1326 | GO:0072141                  | renal interstitial cell development                                                     |
| 1327 | GO:0044344                  | cellular response to fibroblast growth factor stimulus                                  |



|      |                              |                                                                                                                           |
|------|------------------------------|---------------------------------------------------------------------------------------------------------------------------|
| 1328 | KEGG:beta_Alanine_metabolism |                                                                                                                           |
| 1329 | GO:0000176                   | nuclear exosome (RNase complex)                                                                                           |
| 1330 | GO:0097350                   | neutrophil clearance                                                                                                      |
| 1331 | GO:0003157                   | endocardium development                                                                                                   |
| 1332 | GO:0090288                   | negative regulation of cellular response to growth factor stimulus                                                        |
| 1333 | GO:0001763                   | morphogenesis of a branching structure                                                                                    |
| 1334 | GO:0006611                   | protein export from nucleus                                                                                               |
| 1335 | GO:0015728                   | mevalonate transport                                                                                                      |
| 1336 | GO:0032093                   | SAM domain binding                                                                                                        |
| 1337 | GO:0051987                   | positive regulation of attachment of spindle microtubules to kinetochore                                                  |
| 1338 | GO:0071338                   | positive regulation of hair follicle cell proliferation                                                                   |
| 1339 | GO:0032244                   | positive regulation of nucleoside transport                                                                               |
| 1340 | GO:0051128                   | regulation of cellular component organization                                                                             |
| 1341 | GO:0000964                   | mitochondrial RNA 5'-end processing                                                                                       |
| 1342 | GO:0048266                   | behavioral response to pain                                                                                               |
| 1343 | GO:0030289                   | protein phosphatase 4 complex                                                                                             |
| 1344 | GO:0060748                   | tertiary branching involved in mammary gland duct morphogenesis                                                           |
| 1345 | GO:0003148                   | outflow tract septum morphogenesis                                                                                        |
| 1346 | GO:0008074                   | guanylate cyclase complex, soluble                                                                                        |
| 1347 | GO:0005868                   | cytoplasmic dynein complex                                                                                                |
| 1348 | GO:0006740                   | NADPH regeneration                                                                                                        |
| 1349 | GO:0090398                   | cellular senescence                                                                                                       |
| 1350 | GO:0060674                   | placenta blood vessel development                                                                                         |
| 1351 | GO:1902268                   | negative regulation of polyamine transmembrane transport                                                                  |
| 1352 | KEGG:Spliceosome             |                                                                                                                           |
| 1353 | GO:0032204                   | regulation of telomere maintenance                                                                                        |
| 1354 | GO:0033031                   | positive regulation of neutrophil apoptotic process                                                                       |
| 1355 | GO:0016818                   | hydrolase activity, acting on acid anhydrides, in phosphorus-containing anhydrides                                        |
| 1356 | GO:0002460                   | adaptive immune response based on somatic recombination of immune receptors built from immunoglobulin superfamily domains |
| 1357 | GO:0006975                   | DNA damage induced protein phosphorylation                                                                                |
| 1358 | GO:0035749                   | myelin sheath adaxonal region                                                                                             |
| 1359 | GO:0042472                   | inner ear morphogenesis                                                                                                   |
| 1360 | GO:0061441                   | renal artery morphogenesis                                                                                                |
| 1361 | GO:0004896                   | cytokine receptor activity                                                                                                |
| 1362 | GO:0043518                   | negative regulation of DNA damage response,                                                                               |

|      |            |                                                                                                     |
|------|------------|-----------------------------------------------------------------------------------------------------|
| 1363 | GO:0006284 | signal transduction by p53 class mediator                                                           |
| 1364 | GO:0007162 | base-excision repair                                                                                |
| 1365 | GO:0060661 | negative regulation of cell adhesion                                                                |
| 1366 | GO:0002091 | submandibular salivary gland formation                                                              |
| 1367 | GO:0051780 | negative regulation of receptor internalization                                                     |
| 1368 | GO:0006865 | behavioral response to nutrient                                                                     |
| 1369 | GO:0001709 | amino acid transport                                                                                |
| 1370 | GO:0003093 | cell fate determination                                                                             |
| 1371 | GO:0009306 | regulation of glomerular filtration                                                                 |
| 1372 | GO:0001221 | protein secretion                                                                                   |
| 1373 | GO:0030948 | transcription cofactor binding                                                                      |
| 1374 | GO:0048247 | negative regulation of vascular endothelial growth factor receptor signaling pathway                |
| 1375 | GO:0014802 | lymphocyte chemotaxis                                                                               |
| 1376 | GO:0000159 | terminal cisterna                                                                                   |
| 1377 | GO:0045263 | protein phosphatase type 2A complex, proton-transporting ATP synthase complex, coupling factor F(o) |
| 1378 | GO:0036023 | embryonic skeletal limb joint morphogenesis                                                         |
| 1379 | GO:0051536 | iron-sulfur cluster binding                                                                         |
| 1380 | GO:0042542 | response to hydrogen peroxide                                                                       |
| 1381 | GO:0009582 | detection of abiotic stimulus                                                                       |
| 1382 | GO:0071864 | positive regulation of cell proliferation in bone marrow                                            |
| 1383 | GO:0072049 | comma-shaped body morphogenesis                                                                     |
| 1384 | GO:1901666 | positive regulation of NAD <sup>+</sup> ADP-ribosyltransferase activity                             |
| 1385 | GO:0002474 | antigen processing and presentation of peptide antigen via MHC class I                              |
| 1386 | GO:0021589 | cerebellum structural organization                                                                  |
| 1387 | GO:0008219 | cell death                                                                                          |
| 1388 | GO:0007166 | cell surface receptor signaling pathway                                                             |
| 1389 | GO:0008073 | ornithine decarboxylase inhibitor activity                                                          |
| 1390 | GO:0016272 | prefoldin complex                                                                                   |
| 1391 | GO:0006637 | acyl-CoA metabolic process                                                                          |
| 1392 | GO:2000252 | negative regulation of feeding behavior                                                             |
| 1393 | GO:0060513 | prostatic bud formation                                                                             |
| 1394 | GO:0051493 | regulation of cytoskeleton organization                                                             |
| 1395 | GO:0072033 | renal vesicle formation                                                                             |
| 1396 | GO:0047496 | vesicle transport along microtubule                                                                 |
| 1397 | GO:0060201 | clathrin-sculpted acetylcholine transport vesicle membrane                                          |
| 1398 | GO:1902176 | negative regulation of intrinsic apoptotic signaling pathway in response to oxidative               |

|      |                                 |                                                                         |
|------|---------------------------------|-------------------------------------------------------------------------|
|      |                                 | stress                                                                  |
| 1399 | GO:0009401                      | phosphoenolpyruvate-dependent sugar phosphotransferase system           |
| 1400 | GO:0032613                      | interleukin-10 production                                               |
| 1401 | GO:0003273                      | cell migration involved in endocardial cushion formation                |
| 1402 | GO:0008608                      | attachment of spindle microtubules to kinetochore                       |
| 1403 | GO:0072278                      | metanephric comma-shaped body morphogenesis                             |
| 1404 | GO:0022601                      | menstrual cycle phase                                                   |
| 1405 | GO:0005072                      | transforming growth factor beta receptor, cytoplasmic mediator activity |
| 1406 | GO:0048880                      | sensory system development                                              |
| 1407 | KEGG:Cardiac_muscle_contraction |                                                                         |
| 1408 | KEGG:Viral_myocarditis          |                                                                         |
| 1409 | GO:0010807                      | regulation of synaptic vesicle priming                                  |
| 1410 | GO:0007435                      | salivary gland morphogenesis                                            |
| 1411 | GO:0007567                      | parturition                                                             |
| 1412 | GO:0030057                      | desmosome                                                               |
| 1413 | GO:0035999                      | tetrahydrofolate interconversion                                        |
| 1414 | GO:0016992                      | lipoate synthase activity                                               |
| 1415 | GO:0045103                      | intermediate filament-based process                                     |
| 1416 | GO:0072275                      | metanephric glomerulus morphogenesis                                    |
| 1417 | GO:0070412                      | R-SMAD binding                                                          |
| 1418 | GO:0071204                      | histone pre-mRNA 3'end processing complex                               |
| 1419 | GO:0043331                      | response to dsRNA                                                       |
| 1420 | GO:0097332                      | response to antipsychotic drug                                          |
| 1421 | GO:0021549                      | cerebellum development                                                  |
| 1422 | GO:0072669                      | tRNA-splicing ligase complex                                            |
| 1423 | GO:0048662                      | negative regulation of smooth muscle cell proliferation                 |
| 1424 | GO:0008528                      | G-protein coupled peptide receptor activity                             |
| 1425 | GO:0060762                      | regulation of branching involved in mammary gland duct morphogenesis    |
| 1426 | GO:0090316                      | positive regulation of intracellular protein transport                  |
| 1427 | GO:0010724                      | regulation of definitive erythrocyte differentiation                    |
| 1428 | GO:0005689                      | U12-type spliceosomal complex                                           |
| 1429 | GO:0045596                      | negative regulation of cell differentiation                             |
| 1430 | GO:0048680                      | positive regulation of axon regeneration                                |
| 1431 | GO:0032098                      | regulation of appetite                                                  |
| 1432 | GO:0070172                      | positive regulation of tooth mineralization                             |

|      |                                  |                                                                                                                                          |
|------|----------------------------------|------------------------------------------------------------------------------------------------------------------------------------------|
| 1433 | GO:0034613                       | cellular protein localization                                                                                                            |
| 1434 | GO:0034361                       | very-low-density lipoprotein particle                                                                                                    |
| 1435 | GO:0021682                       | nerve maturation                                                                                                                         |
| 1436 | GO:0045638                       | negative regulation of myeloid cell<br>differentiation                                                                                   |
| 1437 | GO:0097449                       | astrocyte projection                                                                                                                     |
| 1438 | GO:0045089                       | positive regulation of innate immune response                                                                                            |
| 1439 | KEGG:Basal_transcription_factors |                                                                                                                                          |
| 1440 | GO:0002548                       | monocyte chemotaxis                                                                                                                      |
| 1441 | GO:0090235                       | regulation of metaphase plate congression                                                                                                |
| 1442 | GO:0032970                       | regulation of actin filament-based process                                                                                               |
| 1443 | GO:0070062                       | extracellular vesicular exosome                                                                                                          |
| 1444 | GO:0030130                       | clathrin coat of trans-Golgi network vesicle                                                                                             |
| 1445 | GO:0031579                       | membrane raft organization                                                                                                               |
| 1446 | GO:0015934                       | large ribosomal subunit                                                                                                                  |
| 1447 | GO:0005643                       | nuclear pore                                                                                                                             |
| 1448 | GO:0051425                       | PTB domain binding                                                                                                                       |
| 1449 | GO:0007631                       | feeding behavior                                                                                                                         |
| 1450 | GO:2001189                       | negative regulation of T cell activation via T<br>cell receptor contact with antigen bound to<br>MHC molecule on antigen presenting cell |
| 1451 | GO:0070411                       | I-SMAD binding                                                                                                                           |
| 1452 | GO:0009986                       | cell surface                                                                                                                             |
| 1453 | GO:0051439                       | regulation of ubiquitin-protein ligase activity<br>involved in mitotic cell cycle                                                        |
| 1454 | GO:0006096                       | glycolysis                                                                                                                               |
| 1455 | GO:0060711                       | labyrinthine layer development                                                                                                           |
| 1456 | GO:0048291                       | isotype switching to IgG isotypes                                                                                                        |
| 1457 | GO:0043932                       | ossification involved in bone remodeling                                                                                                 |
| 1458 | GO:0031370                       | eukaryotic initiation factor 4G binding                                                                                                  |
| 1459 | GO:2000017                       | positive regulation of determination of dorsal<br>identity                                                                               |
| 1460 | GO:0007440                       | foregut morphogenesis                                                                                                                    |
| 1461 | GO:0043382                       | positive regulation of memory T cell<br>differentiation                                                                                  |
| 1462 | GO:0010989                       | negative regulation of low-density lipoprotein<br>particle clearance                                                                     |
| 1463 | GO:0005773                       | vacuole                                                                                                                                  |
| 1464 | GO:0016668                       | oxidoreductase activity, acting on a sulfur group<br>of donors, NAD(P) as acceptor                                                       |
| 1465 | GO:0007159                       | leukocyte cell-cell adhesion                                                                                                             |
| 1466 | GO:0000096                       | sulfur amino acid metabolic process                                                                                                      |
| 1467 | GO:0071985                       | multivesicular body sorting pathway                                                                                                      |
| 1468 | GO:0000145                       | exocyst                                                                                                                                  |

|      |            |                                                                         |
|------|------------|-------------------------------------------------------------------------|
| 1469 | GO:0003207 | cardiac chamber formation                                               |
| 1470 | GO:0030097 | hemopoiesis                                                             |
| 1471 | GO:0005829 | cytosol                                                                 |
| 1472 | GO:0016032 | viral process                                                           |
| 1473 | GO:0043206 | extracellular fibril organization                                       |
| 1474 | GO:0045598 | regulation of fat cell differentiation                                  |
| 1475 | GO:0007389 | pattern specification process                                           |
| 1476 | GO:0038001 | paracrine signaling                                                     |
| 1477 | GO:0000940 | condensed chromosome outer kinetochore                                  |
| 1478 | GO:0071942 | XPC complex                                                             |
| 1479 | GO:0051081 | nuclear envelope disassembly                                            |
| 1480 | GO:0050764 | regulation of phagocytosis                                              |
| 1481 | GO:0008188 | neuropeptide receptor activity                                          |
| 1482 | GO:0042605 | peptide antigen binding                                                 |
| 1483 | GO:0030377 | urokinase plasminogen activator receptor activity                       |
| 1484 | GO:0035418 | protein localization to synapse                                         |
| 1485 | GO:0008540 | proteasome regulatory particle, base subcomplex                         |
| 1486 | GO:0009725 | response to hormone                                                     |
| 1487 | GO:0004882 | androgen receptor activity                                              |
| 1488 | GO:0051726 | regulation of cell cycle                                                |
| 1489 | GO:0071417 | cellular response to organonitrogen compound                            |
| 1490 | GO:0097150 | neuronal stem cell maintenance                                          |
| 1491 | GO:0071556 | integral component of luminal side of endoplasmic reticulum membrane    |
| 1492 | GO:0097421 | liver regeneration                                                      |
| 1493 | GO:0005484 | SNAP receptor activity                                                  |
| 1494 | GO:0005501 | retinoid binding                                                        |
| 1495 | GO:0038025 | reelin receptor activity                                                |
| 1496 | GO:0050790 | regulation of catalytic activity                                        |
| 1497 | GO:0051054 | positive regulation of DNA metabolic process                            |
| 1498 | GO:0044267 | cellular protein metabolic process                                      |
| 1499 | GO:0001878 | response to yeast                                                       |
| 1500 | GO:1901299 | negative regulation of hydrogen peroxide-mediated programmed cell death |
| 1501 | GO:0010833 | telomere maintenance via telomere lengthening                           |
| 1502 | GO:0006853 | carnitine shuttle                                                       |
| 1503 | GO:0031333 | negative regulation of protein complex assembly                         |
| 1504 | GO:0035093 | spermatogenesis, exchange of chromosomal proteins                       |
| 1505 | GO:0003241 | growth involved in heart morphogenesis                                  |
| 1506 | GO:0010745 | negative regulation of macrophage derived foam cell differentiation     |

|      |                     |                                                      |
|------|---------------------|------------------------------------------------------|
| 1507 | GO:0021615          | glossopharyngeal nerve morphogenesis                 |
| 1508 | GO:0005886          | plasma membrane                                      |
| 1509 | KEGG:RNA_polymerase |                                                      |
| 1510 | GO:0016282          | eukaryotic 43S preinitiation complex                 |
| 1511 | GO:0019855          | calcium channel inhibitor activity                   |
| 1512 | GO:0071455          | cellular response to hyperoxia                       |
| 1513 | GO:0060628          | regulation of ER to Golgi vesicle-mediated transport |
| 1514 | GO:0045738          | negative regulation of DNA repair                    |
| 1515 | GO:0001508          | regulation of action potential                       |
| 1516 | GO:0021515          | cell differentiation in spinal cord                  |
| 1517 | GO:0002024          | diet induced thermogenesis                           |
| 1518 | GO:0031588          | AMP-activated protein kinase complex                 |
| 1519 | GO:0021545          | cranial nerve development                            |
| 1520 | GO:0010715          | regulation of extracellular matrix disassembly       |
| 1521 | GO:0016459          | myosin complex                                       |
| 1522 | GO:0031100          | organ regeneration                                   |
| 1523 | GO:0035581          | sequestering of extracellular ligand from receptor   |
| 1524 | GO:0005899          | insulin receptor complex                             |
| 1525 | GO:0022037          | metencephalon development                            |
| 1526 | GO:1902546          | positive regulation of DNA N-glycosylase activity    |
| 1527 | GO:0004716          | receptor signaling protein tyrosine kinase activity  |
| 1528 | GO:0031419          | cobalamin binding                                    |
| 1529 | GO:0009982          | pseudouridine synthase activity                      |
| 1530 | GO:0032455          | nerve growth factor processing                       |
| 1531 | GO:1901201          | regulation of extracellular matrix assembly          |
| 1532 | GO:0060402          | calcium ion transport into cytosol                   |
| 1533 | GO:0007028          | cytoplasm organization                               |
| 1534 | GO:0012507          | ER to Golgi transport vesicle membrane               |
| 1535 | GO:0019013          | viral nucleocapsid                                   |
| 1536 | GO:0044242          | cellular lipid catabolic process                     |
| 1537 | GO:0005788          | endoplasmic reticulum lumen                          |
| 1538 | GO:0007423          | sensory organ development                            |
| 1539 | GO:0042594          | response to starvation                               |
| 1540 | GO:0010467          | gene expression                                      |
| 1541 | GO:0001921          | positive regulation of receptor recycling            |
| 1542 | GO:0021569          | rhombomere 3 development                             |
| 1543 | GO:0043497          | regulation of protein heterodimerization activity    |
| 1544 | GO:0071159          | NF-kappaB complex                                    |
| 1545 | GO:0008191          | metalloendopeptidase inhibitor activity              |
| 1546 | GO:0016627          | oxidoreductase activity, acting on the CH-CH         |

|      |                                               |                                                                            |
|------|-----------------------------------------------|----------------------------------------------------------------------------|
|      |                                               | group of donors                                                            |
| 1547 | GO:0003254                                    | regulation of membrane depolarization                                      |
| 1548 | GO:0021568                                    | rhombomere 2 development                                                   |
| 1549 | GO:0001503                                    | ossification                                                               |
| 1550 | GO:0043190                                    | ATP-binding cassette (ABC) transporter complex                             |
| 1551 | GO:0032964                                    | collagen biosynthetic process                                              |
| 1552 | GO:0046683                                    | response to organophosphorus                                               |
| 1553 | GO:0045668                                    | negative regulation of osteoblast differentiation                          |
| 1554 | GO:0033629                                    | negative regulation of cell adhesion mediated by integrin                  |
| 1555 | KEGG:Vasopressin_regulated_water_reabsorption |                                                                            |
| 1556 | GO:2000643                                    | positive regulation of early endosome to late endosome transport           |
| 1557 | GO:0021796                                    | cerebral cortex regionalization                                            |
| 1558 | GO:0009437                                    | carnitine metabolic process                                                |
| 1559 | GO:0007175                                    | negative regulation of epidermal growth factor-activated receptor activity |
| 1560 | GO:0010032                                    | meiotic chromosome condensation                                            |
| 1561 | GO:0032473                                    | cytoplasmic side of mitochondrial outer membrane                           |
| 1562 | GO:0048638                                    | regulation of developmental growth                                         |
| 1563 | GO:2001275                                    | positive regulation of glucose import in response to insulin stimulus      |
| 1564 | GO:0043512                                    | inhibin A complex                                                          |
| 1565 | GO:0010481                                    | epidermal cell division                                                    |
| 1566 | GO:0035650                                    | AP-1 adaptor complex binding                                               |
| 1567 | GO:0071558                                    | histone demethylase activity (H3-K27 specific)                             |
| 1568 | GO:0001501                                    | skeletal system development                                                |
| 1569 | GO:0000776                                    | kinetochore                                                                |
| 1570 | GO:1901164                                    | negative regulation of trophoblast cell migration                          |
| 1571 | GO:0032792                                    | negative regulation of CREB transcription factor activity                  |
| 1572 | GO:0045836                                    | positive regulation of meiosis                                             |
| 1573 | GO:0043394                                    | proteoglycan binding                                                       |
| 1574 | GO:0046950                                    | cellular ketone body metabolic process                                     |
| 1575 | GO:0002142                                    | stereocilia ankle link complex                                             |
| 1576 | GO:0005965                                    | protein farnesyltransferase complex                                        |
| 1577 | GO:0001935                                    | endothelial cell proliferation                                             |
| 1578 | GO:0007499                                    | ectoderm and mesoderm interaction                                          |
| 1579 | GO:0060484                                    | lung-associated mesenchyme development                                     |
| 1580 | GO:0060279                                    | positive regulation of ovulation                                           |
| 1581 | GO:0016667                                    | oxidoreductase activity, acting on a sulfur group                          |

|      |                                                     |                                                                                                                                                                               |
|------|-----------------------------------------------------|-------------------------------------------------------------------------------------------------------------------------------------------------------------------------------|
|      |                                                     | of donors                                                                                                                                                                     |
| 1582 | GO:0016709                                          | oxidoreductase activity, acting on paired donors,<br>with incorporation or reduction of molecular<br>oxygen, NAD(P)H as one donor, and<br>incorporation of one atom of oxygen |
| 1583 | GO:0002507                                          | tolerance induction                                                                                                                                                           |
| 1584 | GO:1901383                                          | negative regulation of chorionic trophoblast cell<br>proliferation                                                                                                            |
| 1585 | GO:0097009                                          | energy homeostasis                                                                                                                                                            |
| 1586 | GO:0031670                                          | cellular response to nutrient                                                                                                                                                 |
| 1587 | KEGG:Glyoxylate_and_dicarboxylate_m<br>etabolism    |                                                                                                                                                                               |
| 1588 | GO:0035564                                          | regulation of kidney size                                                                                                                                                     |
| 1589 | GO:0030027                                          | lamellipodium                                                                                                                                                                 |
| 1590 | KEGG:Glycerolipid_metabolism                        |                                                                                                                                                                               |
| 1591 | KEGG:Cell_adhesion_molecules__CAM<br>s_             |                                                                                                                                                                               |
| 1592 | GO:0005953                                          | CAAX-protein geranylgeranyltransferase<br>complex                                                                                                                             |
| 1593 | GO:1990023                                          | mitotic spindle midzone                                                                                                                                                       |
| 1594 | GO:1901194                                          | negative regulation of formation of translation<br>preinitiation complex                                                                                                      |
| 1595 | GO:0047484                                          | regulation of response to osmotic stress                                                                                                                                      |
| 1596 | GO:0030539                                          | male genitalia development                                                                                                                                                    |
| 1597 | KEGG:Nitrogen_metabolism                            |                                                                                                                                                                               |
| 1598 | GO:0002637                                          | regulation of immunoglobulin production                                                                                                                                       |
| 1599 | GO:0019908                                          | nuclear cyclin-dependent protein kinase<br>holoenzyme complex                                                                                                                 |
| 1600 | GO:0002551                                          | mast cell chemotaxis                                                                                                                                                          |
| 1601 | GO:0009360                                          | DNA polymerase III complex                                                                                                                                                    |
| 1602 | GO:0018342                                          | protein prenylation                                                                                                                                                           |
| 1603 | GO:2000381                                          | negative regulation of mesoderm development                                                                                                                                   |
| 1604 | GO:0019809                                          | spermidine binding                                                                                                                                                            |
| 1605 | GO:2000969                                          | positive regulation of<br>alpha-amino-3-hydroxy-5-methyl-4-isoxazole<br>propionate selective glutamate receptor activity                                                      |
| 1606 | KEGG:Synthesis_and_degradation_of_k<br>etone_bodies |                                                                                                                                                                               |
| 1607 | GO:0030178                                          | negative regulation of Wnt signaling pathway                                                                                                                                  |
| 1608 | GO:0042574                                          | retinal metabolic process                                                                                                                                                     |
| 1609 | GO:0060312                                          | regulation of blood vessel remodeling                                                                                                                                         |
| 1610 | GO:0010923                                          | negative regulation of phosphatase activity                                                                                                                                   |
| 1611 | GO:0033503                                          | HULC complex                                                                                                                                                                  |
| 1612 | GO:0009404                                          | toxin metabolic process                                                                                                                                                       |



|      |            |                                                              |
|------|------------|--------------------------------------------------------------|
| 1613 | GO:0042138 | meiotic DNA double-strand break formation                    |
| 1614 | GO:0046836 | glycolipid transport                                         |
| 1615 | GO:0003183 | mitral valve morphogenesis                                   |
| 1616 | GO:0005751 | mitochondrial respiratory chain complex IV                   |
| 1617 | GO:0033327 | Leydig cell differentiation                                  |
| 1618 | GO:0060998 | regulation of dendritic spine development                    |
| 1619 | GO:0003676 | nucleic acid binding                                         |
| 1620 | GO:0043547 | positive regulation of GTPase activity                       |
| 1621 | GO:0048147 | negative regulation of fibroblast proliferation              |
| 1622 | GO:0071467 | cellular response to pH                                      |
| 1623 | GO:0001881 | receptor recycling                                           |
| 1624 | GO:0005744 | mitochondrial inner membrane presequence translocase complex |
| 1625 | GO:0060259 | regulation of feeding behavior                               |
| 1626 | GO:0050679 | positive regulation of epithelial cell proliferation         |
| 1627 | GO:0071453 | cellular response to oxygen levels                           |
| 1628 | GO:0005662 | DNA replication factor A complex                             |
| 1629 | GO:0030496 | midbody                                                      |
| 1630 | GO:0005743 | mitochondrial inner membrane                                 |
| 1631 | GO:0006766 | vitamin metabolic process                                    |
| 1632 | GO:0004888 | transmembrane signaling receptor activity                    |
| 1633 | GO:2000189 | positive regulation of cholesterol homeostasis               |
| 1634 | GO:0030011 | maintenance of cell polarity                                 |
| 1635 | GO:0030325 | adrenal gland development                                    |
| 1636 | GO:0033186 | CAF-1 complex                                                |
| 1637 | GO:0045667 | regulation of osteoblast differentiation                     |
| 1638 | GO:0030070 | insulin processing                                           |
| 1639 | GO:0045879 | negative regulation of smoothened signaling pathway          |
| 1640 | GO:0005902 | microvillus                                                  |
| 1641 | GO:0071676 | negative regulation of mononuclear cell migration            |
| 1642 | GO:0006886 | intracellular protein transport                              |
| 1643 | GO:0043546 | molybdopterin cofactor binding                               |
| 1644 | GO:0031233 | intrinsic component of external side of plasma membrane      |
| 1645 | GO:0045271 | respiratory chain complex I                                  |
| 1646 | GO:0031641 | regulation of myelination                                    |
| 1647 | GO:0060413 | atrial septum morphogenesis                                  |
| 1648 | GO:0015833 | peptide transport                                            |
| 1649 | GO:0014806 | smooth muscle hyperplasia                                    |
| 1650 | GO:0035253 | ciliary rootlet                                              |
| 1651 | GO:0001756 | somitogenesis                                                |
| 1652 | GO:0010988 | regulation of low-density lipoprotein particle               |

|      |            |                                                                       |
|------|------------|-----------------------------------------------------------------------|
|      |            | clearance                                                             |
| 1653 | GO:0050839 | cell adhesion molecule binding                                        |
| 1654 | GO:0014063 | negative regulation of serotonin secretion                            |
| 1655 | GO:0031681 | G-protein beta-subunit binding                                        |
| 1656 | GO:0006788 | heme oxidation                                                        |
| 1657 | GO:1901301 | regulation of cargo loading into COPII-coated vesicle                 |
| 1658 | GO:0002040 | sprouting angiogenesis                                                |
| 1659 | GO:0016281 | eukaryotic translation initiation factor 4F complex                   |
| 1660 | GO:0034709 | methylosome                                                           |
| 1661 | GO:0003309 | type B pancreatic cell differentiation                                |
| 1662 | GO:0090074 | negative regulation of protein homodimerization activity              |
| 1663 | GO:0005811 | lipid particle                                                        |
| 1664 | GO:0021675 | nerve development                                                     |
| 1665 | GO:0010470 | regulation of gastrulation                                            |
| 1666 | GO:0022626 | cytosolic ribosome                                                    |
| 1667 | GO:0009409 | response to cold                                                      |
| 1668 | GO:0005534 | galactose binding                                                     |
| 1669 | GO:1900063 | regulation of peroxisome organization                                 |
| 1670 | GO:2000002 | negative regulation of DNA damage checkpoint                          |
| 1671 | GO:0043256 | laminin complex                                                       |
| 1672 | GO:0060735 | regulation of eIF2 alpha phosphorylation by dsRNA                     |
| 1673 | GO:0050680 | negative regulation of epithelial cell proliferation                  |
| 1674 | GO:0019838 | growth factor binding                                                 |
| 1675 | GO:0010886 | positive regulation of cholesterol storage                            |
| 1676 | GO:0005760 | gamma DNA polymerase complex                                          |
| 1677 | GO:0000296 | spermine transport                                                    |
| 1678 | GO:0034362 | low-density lipoprotein particle                                      |
| 1679 | GO:0071800 | podosome assembly                                                     |
| 1680 | GO:0004392 | heme oxygenase (decyclizing) activity                                 |
| 1681 | GO:0090096 | positive regulation of metanephric cap mesenchymal cell proliferation |
| 1682 | GO:0050665 | hydrogen peroxide biosynthetic process                                |
| 1683 | GO:0048313 | Golgi inheritance                                                     |
| 1684 | GO:0060575 | intestinal epithelial cell differentiation                            |
| 1685 | GO:0021543 | pallium development                                                   |
| 1686 | GO:0050859 | negative regulation of B cell receptor signaling pathway              |
| 1687 | GO:0001750 | photoreceptor outer segment                                           |
| 1688 | GO:0016298 | lipase activity                                                       |

|      |                                              |                                                          |
|------|----------------------------------------------|----------------------------------------------------------|
| 1689 | GO:0034616                                   | response to laminar fluid shear stress                   |
| 1690 | GO:0070083                                   | clathrin-sculpted monoamine transport vesicle membrane   |
| 1691 | GO:0015908                                   | fatty acid transport                                     |
| 1692 | GO:0032095                                   | regulation of response to food                           |
| 1693 | GO:0032623                                   | interleukin-2 production                                 |
| 1694 | GO:2000609                                   | regulation of thyroid hormone generation                 |
| 1695 | GO:0004766                                   | spermidine synthase activity                             |
| 1696 | GO:0004728                                   | receptor signaling protein tyrosine phosphatase activity |
| 1697 | GO:0030917                                   | midbrain-hindbrain boundary development                  |
| 1698 | GO:0045502                                   | dynein binding                                           |
| 1699 | GO:0001889                                   | liver development                                        |
| 1700 | GO:0002176                                   | male germ cell proliferation                             |
| 1701 | GO:0009890                                   | negative regulation of biosynthetic process              |
| 1702 | GO:0072592                                   | oxygen metabolic process                                 |
| 1703 | GO:0001823                                   | mesonephros development                                  |
| 1704 | GO:0005125                                   | cytokine activity                                        |
| 1705 | GO:0005887                                   | integral component of plasma membrane                    |
| 1706 | GO:0016559                                   | peroxisome fission                                       |
| 1707 | GO:0032808                                   | lacrimal gland development                               |
| 1708 | GO:0042166                                   | acetylcholine binding                                    |
| 1709 | GO:0031175                                   | neuron projection development                            |
| 1710 | KEGG:Proximal_tubule_bicarbonate_reclamation |                                                          |
| 1711 | GO:0070664                                   | negative regulation of leukocyte proliferation           |
| 1712 | GO:0051287                                   | NAD binding                                              |
| 1713 | GO:0033063                                   | Rad51B-Rad51C-Rad51D-XRCC2 complex                       |
| 1714 | GO:0032092                                   | positive regulation of protein binding                   |
| 1715 | GO:0046824                                   | positive regulation of nucleocytoplasmic transport       |
| 1716 | GO:0051835                                   | positive regulation of synapse structural plasticity     |
| 1717 | GO:0072210                                   | metanephric nephron development                          |
| 1718 | GO:0001955                                   | blood vessel maturation                                  |
| 1719 | GO:0005892                                   | acetylcholine-gated channel complex                      |
| 1720 | GO:0022617                                   | extracellular matrix disassembly                         |
| 1721 | GO:0046540                                   | U4/U6 x U5 tri-snRNP complex                             |
| 1722 | KEGG:Vibrio_cholerae_infection               |                                                          |
| 1723 | GO:0030552                                   | cAMP binding                                             |
| 1724 | GO:0097057                                   | TRAF2-GSTP1 complex                                      |
| 1725 | GO:0031510                                   | SUMO activating enzyme complex                           |
| 1726 | GO:0097114                                   | N-methyl-D-aspartate receptor clustering                 |
| 1727 | GO:0032902                                   | nerve growth factor production                           |

|      |                                             |                                                                    |
|------|---------------------------------------------|--------------------------------------------------------------------|
| 1728 | KEGG:Asthma                                 |                                                                    |
| 1729 | GO:0045294                                  | alpha-catenin binding                                              |
| 1730 | GO:0010256                                  | endomembrane system organization                                   |
| 1731 | GO:0043270                                  | positive regulation of ion transport                               |
| 1732 | GO:0060623                                  | regulation of chromosome condensation                              |
| 1733 | GO:0043462                                  | regulation of ATPase activity                                      |
| 1734 | GO:0005686                                  | U2 snRNP                                                           |
| 1735 | GO:0002407                                  | dendritic cell chemotaxis                                          |
| 1736 | GO:0003404                                  | optic vesicle morphogenesis                                        |
| 1737 | GO:0015464                                  | acetylcholine receptor activity                                    |
| 1738 | GO:0050678                                  | regulation of epithelial cell proliferation                        |
| 1739 | GO:0004601                                  | peroxidase activity                                                |
| 1740 | GO:0010766                                  | negative regulation of sodium ion transport                        |
| 1741 | KEGG:Bacterial_invasion_of_epithelial_cells |                                                                    |
| 1742 | GO:0070324                                  | thyroid hormone binding                                            |
| 1743 | GO:0031514                                  | motile cilium                                                      |
| 1744 | GO:0086004                                  | regulation of cardiac muscle cell contraction                      |
| 1745 | GO:0044770                                  | cell cycle phase transition                                        |
| 1746 | GO:0005095                                  | GTPase inhibitor activity                                          |
| 1747 | GO:0032543                                  | mitochondrial translation                                          |
| 1748 | GO:0002945                                  | cyclin K-CDK13 complex                                             |
| 1749 | KEGG:Pancreatic_secretion                   |                                                                    |
| 1750 | GO:0005916                                  | fascia adherens                                                    |
| 1751 | GO:0071364                                  | cellular response to epidermal growth factor stimulus              |
| 1752 | GO:0003105                                  | negative regulation of glomerular filtration                       |
| 1753 | GO:0042989                                  | sequestering of actin monomers                                     |
| 1754 | GO:0050867                                  | positive regulation of cell activation                             |
| 1755 | GO:0044111                                  | development involved in symbiotic interaction                      |
| 1756 | GO:0042978                                  | ornithine decarboxylase activator activity                         |
| 1757 | GO:0051388                                  | positive regulation of neurotrophin TRK receptor signaling pathway |
| 1758 | GO:0048495                                  | Roundabout binding                                                 |
| 1759 | GO:0003409                                  | optic cup structural organization                                  |
| 1760 | GO:0032299                                  | ribonuclease H2 complex                                            |
| 1761 | KEGG:Nucleotide_excision_repair             |                                                                    |
| 1762 | GO:0061034                                  | olfactory bulb mitral cell layer development                       |
| 1763 | GO:0007320                                  | insemination                                                       |
| 1764 | GO:0002162                                  | dystroglycan binding                                               |
| 1765 | GO:0007154                                  | cell communication                                                 |
| 1766 | GO:0035845                                  | photoreceptor cell outer segment organization                      |
| 1767 | GO:2000738                                  | positive regulation of stem cell differentiation                   |
| 1768 | GO:0080164                                  | regulation of nitric oxide metabolic process                       |

|      |                 |                                                                               |
|------|-----------------|-------------------------------------------------------------------------------|
| 1769 | GO:0090136      | epithelial cell-cell adhesion                                                 |
| 1770 | GO:0001667      | ameboidal cell migration                                                      |
| 1771 | GO:0019089      | transmission of virus                                                         |
| 1772 | GO:0021623      | oculomotor nerve formation                                                    |
| 1773 | GO:0061078      | positive regulation of prostaglandin secretion<br>involved in immune response |
| 1774 | GO:0043116      | negative regulation of vascular permeability                                  |
| 1775 | GO:0006289      | nucleotide-excision repair                                                    |
| 1776 | GO:0042262      | DNA protection                                                                |
| 1777 | GO:2000785      | regulation of autophagic vacuole assembly                                     |
| 1778 | GO:0005971      | ribonucleoside-diphosphate reductase complex                                  |
| 1779 | GO:0042640      | anagen                                                                        |
| 1780 | GO:0000302      | response to reactive oxygen species                                           |
| 1781 | GO:0006307      | DNA dealkylation involved in DNA repair                                       |
| 1782 | GO:0060346      | bone trabecula formation                                                      |
| 1783 | GO:0050807      | regulation of synapse organization                                            |
| 1784 | GO:0001553      | luteinization                                                                 |
| 1785 | GO:0051156      | glucose 6-phosphate metabolic process                                         |
| 1786 | GO:0043560      | insulin receptor substrate binding                                            |
| 1787 | GO:0035902      | response to immobilization stress                                             |
| 1788 | GO:0030667      | secretory granule membrane                                                    |
| 1789 | GO:0072554      | blood vessel lumenization                                                     |
| 1790 | GO:0060561      | apoptotic process involved in morphogenesis                                   |
| 1791 | GO:0071782      | endoplasmic reticulum tubular network                                         |
| 1792 | GO:0031314      | extrinsic component of mitochondrial inner<br>membrane                        |
| 1793 | GO:0048407      | platelet-derived growth factor binding                                        |
| 1794 | KEGG:Cell_cycle |                                                                               |
| 1795 | GO:0007492      | endoderm development                                                          |
| 1796 | GO:0036035      | osteoclast development                                                        |
| 1797 | GO:0055105      | ubiquitin-protein ligase inhibitor activity                                   |
| 1798 | GO:1900195      | positive regulation of oocyte maturation                                      |
| 1799 | GO:0035612      | AP-2 adaptor complex binding                                                  |
| 1800 | GO:0005838      | proteasome regulatory particle                                                |
| 1801 | GO:0009408      | response to heat                                                              |
| 1802 | GO:0010468      | regulation of gene expression                                                 |
| 1803 | GO:0048260      | positive regulation of receptor-mediated<br>endocytosis                       |
| 1804 | GO:0030154      | cell differentiation                                                          |
| 1805 | GO:0033605      | positive regulation of catecholamine secretion                                |
| 1806 | GO:0044393      | microspike                                                                    |
| 1807 | GO:0034098      | Cdc48p-Npl4p-Ufd1p AAA ATPase complex                                         |
| 1808 | GO:0001504      | neurotransmitter uptake                                                       |
| 1809 | GO:0051021      | GDP-dissociation inhibitor binding                                            |

|      |            |                                                                                                        |
|------|------------|--------------------------------------------------------------------------------------------------------|
| 1810 | GO:2000648 | positive regulation of stem cell proliferation                                                         |
| 1811 | GO:0097454 | Schwann cell microvillus                                                                               |
| 1812 | GO:0015026 | coreceptor activity                                                                                    |
| 1813 | GO:0042089 | cytokine biosynthetic process                                                                          |
| 1814 | GO:0021819 | layer formation in cerebral cortex                                                                     |
| 1815 | GO:0005523 | tropomyosin binding                                                                                    |
| 1816 | GO:1900182 | positive regulation of protein localization to nucleus                                                 |
| 1817 | GO:0018171 | peptidyl-cysteine oxidation                                                                            |
| 1818 | GO:0016446 | somatic hypermutation of immunoglobulin genes                                                          |
| 1819 | GO:0009968 | negative regulation of signal transduction                                                             |
| 1820 | GO:0007379 | segment specification                                                                                  |
| 1821 | GO:0032301 | MutSalpha complex                                                                                      |
| 1822 | GO:0002792 | negative regulation of peptide secretion                                                               |
| 1823 | GO:0046326 | positive regulation of glucose import                                                                  |
| 1824 | GO:0005608 | laminin-3 complex                                                                                      |
| 1825 | GO:0033505 | floor plate morphogenesis                                                                              |
| 1826 | GO:0007051 | spindle organization                                                                                   |
| 1827 | GO:0051047 | positive regulation of secretion                                                                       |
| 1828 | GO:0008210 | estrogen metabolic process                                                                             |
| 1829 | GO:0035718 | macrophage migration inhibitory factor binding                                                         |
| 1830 | GO:0070969 | ULK1-ATG13-FIP200 complex                                                                              |
| 1831 | GO:0060138 | fetal process involved in parturition                                                                  |
| 1832 | GO:0044262 | cellular carbohydrate metabolic process                                                                |
| 1833 | GO:0048039 | ubiquinone binding                                                                                     |
| 1834 | GO:0090010 | transforming growth factor beta receptor signaling pathway involved in primitive streak formation      |
| 1835 | GO:0009649 | entrainment of circadian clock                                                                         |
| 1836 | GO:0000710 | meiotic mismatch repair                                                                                |
| 1837 | GO:0008484 | sulfuric ester hydrolase activity                                                                      |
| 1838 | GO:0035693 | NOS2-CD74 complex                                                                                      |
| 1839 | GO:0035867 | alphav-beta3 integrin-IGF-1-IGF1R complex                                                              |
| 1840 | GO:0005176 | ErbB-2 class receptor binding                                                                          |
| 1841 | GO:2000021 | regulation of ion homeostasis                                                                          |
| 1842 | GO:0060802 | epiblast cell-extraembryonic ectoderm cell signaling involved in anterior/posterior axis specification |
| 1843 | GO:0009410 | response to xenobiotic stimulus                                                                        |
| 1844 | GO:0008038 | neuron recognition                                                                                     |
| 1845 | GO:0000046 | autophagic vacuole fusion                                                                              |
| 1846 | GO:0040036 | regulation of fibroblast growth factor receptor signaling pathway                                      |

|      |            |                                                                                             |
|------|------------|---------------------------------------------------------------------------------------------|
| 1847 | GO:0048538 | thymus development                                                                          |
| 1848 | GO:0071944 | cell periphery                                                                              |
| 1849 | GO:0010811 | positive regulation of cell-substrate adhesion                                              |
| 1850 | GO:0050918 | positive chemotaxis                                                                         |
| 1851 | GO:0035692 | macrophage migration inhibitory factor receptor complex                                     |
| 1852 | GO:0021540 | corpus callosum morphogenesis                                                               |
| 1853 | GO:0002085 | inhibition of neuroepithelial cell differentiation                                          |
| 1854 | GO:0046649 | lymphocyte activation                                                                       |
| 1855 | GO:2000645 | negative regulation of receptor catabolic process                                           |
| 1856 | GO:0004784 | superoxide dismutase activity                                                               |
| 1857 | GO:0060045 | positive regulation of cardiac muscle cell proliferation                                    |
| 1858 | GO:0031936 | negative regulation of chromatin silencing                                                  |
| 1859 | GO:2000536 | negative regulation of entry of bacterium into host cell                                    |
| 1860 | GO:0001831 | trophectodermal cellular morphogenesis                                                      |
| 1861 | GO:0070053 | thrombospondin receptor activity                                                            |
| 1862 | GO:0010324 | membrane invagination                                                                       |
| 1863 | GO:1900747 | negative regulation of vascular endothelial growth factor signaling pathway                 |
| 1864 | GO:0019883 | antigen processing and presentation of endogenous antigen                                   |
| 1865 | GO:0005768 | endosome                                                                                    |
| 1866 | GO:0002199 | zona pellucida receptor complex                                                             |
| 1867 | GO:0042167 | heme catabolic process                                                                      |
| 1868 | GO:0051799 | negative regulation of hair follicle development                                            |
| 1869 | GO:0001520 | outer dense fiber                                                                           |
| 1870 | GO:0033342 | negative regulation of collagen binding                                                     |
| 1871 | GO:0016342 | catenin complex                                                                             |
| 1872 | GO:0048382 | mesendoderm development                                                                     |
| 1873 | GO:0048678 | response to axon injury                                                                     |
| 1874 | GO:0070410 | co-SMAD binding                                                                             |
| 1875 | GO:0050748 | negative regulation of lipoprotein metabolic process                                        |
| 1876 | GO:0005832 | chaperonin-containing T-complex                                                             |
| 1877 | GO:0001010 | sequence-specific DNA binding transcription factor recruiting transcription factor activity |
| 1878 | GO:0042733 | embryonic digit morphogenesis                                                               |
| 1879 | GO:0031369 | translation initiation factor binding                                                       |
| 1880 | GO:0030426 | growth cone                                                                                 |
| 1881 | GO:0006629 | lipid metabolic process                                                                     |
| 1882 | GO:0019682 | glyceraldehyde-3-phosphate metabolic process                                                |
| 1883 | GO:0010957 | negative regulation of vitamin D biosynthetic                                               |

|      |                                             |                                                                                 |
|------|---------------------------------------------|---------------------------------------------------------------------------------|
|      |                                             | process                                                                         |
| 1884 | GO:0005604                                  | basement membrane                                                               |
| 1885 | GO:0051028                                  | mRNA transport                                                                  |
| 1886 | GO:0006809                                  | nitric oxide biosynthetic process                                               |
| 1887 | GO:0006644                                  | phospholipid metabolic process                                                  |
| 1888 | GO:0042176                                  | regulation of protein catabolic process                                         |
| 1889 | GO:0070765                                  | gamma-secretase complex                                                         |
| 1890 | GO:0045751                                  | negative regulation of Toll signaling pathway                                   |
| 1891 | GO:0031362                                  | anchored component of external side of plasma membrane                          |
| 1892 | GO:0000117                                  | regulation of transcription involved in G2/M transition of mitotic cell cycle   |
| 1893 | GO:0032809                                  | neuronal cell body membrane                                                     |
| 1894 | KEGG:RNA_degradation                        |                                                                                 |
| 1895 | GO:0001917                                  | photoreceptor inner segment                                                     |
| 1896 | GO:0001135                                  | RNA polymerase II transcription factor recruiting transcription factor activity |
| 1897 | GO:0071013                                  | catalytic step 2 spliceosome                                                    |
| 1898 | GO:0016615                                  | malate dehydrogenase activity                                                   |
| 1899 | GO:0002060                                  | purine nucleobase binding                                                       |
| 1900 | GO:0016202                                  | regulation of striated muscle tissue development                                |
| 1901 | GO:0071157                                  | negative regulation of cell cycle arrest                                        |
| 1902 | GO:0042035                                  | regulation of cytokine biosynthetic process                                     |
| 1903 | GO:0031491                                  | nucleosome binding                                                              |
| 1904 | GO:0000932                                  | cytoplasmic mRNA processing body                                                |
| 1905 | GO:0032389                                  | MutLalpha complex                                                               |
| 1906 | KEGG:Nicotinate_and_nicotinamide_metabolism |                                                                                 |
| 1907 | GO:0030501                                  | positive regulation of bone mineralization                                      |
| 1908 | GO:0030884                                  | exogenous lipid antigen binding                                                 |
| 1909 | GO:0033290                                  | eukaryotic 48S preinitiation complex                                            |
| 1910 | GO:0002116                                  | semaphorin receptor complex                                                     |
| 1911 | GO:0060166                                  | olfactory pit development                                                       |
| 1912 | GO:0006869                                  | lipid transport                                                                 |
| 1913 | GO:0034719                                  | SMN-Sm protein complex                                                          |
| 1914 | GO:0009432                                  | SOS response                                                                    |
| 1915 | GO:0010494                                  | cytoplasmic stress granule                                                      |
| 1916 | KEGG:TGF_beta_signaling_pathway             |                                                                                 |
| 1917 | GO:0021636                                  | trigeminal nerve morphogenesis                                                  |
| 1918 | GO:0001731                                  | formation of translation preinitiation complex                                  |
| 1919 | GO:0045728                                  | respiratory burst after phagocytosis                                            |
| 1920 | GO:0050922                                  | negative regulation of chemotaxis                                               |
| 1921 | GO:0005687                                  | U4 snRNP                                                                        |
| 1922 | GO:0071243                                  | cellular response to arsenic-containing                                         |



|      |                                 |                                                                             |
|------|---------------------------------|-----------------------------------------------------------------------------|
|      |                                 | substance                                                                   |
| 1923 | GO:0071425                      | hematopoietic stem cell proliferation                                       |
| 1924 | GO:0051255                      | spindle midzone assembly                                                    |
| 1925 | GO:0043616                      | keratinocyte proliferation                                                  |
| 1926 | GO:0060021                      | palate development                                                          |
| 1927 | GO:0034505                      | tooth mineralization                                                        |
| 1928 | GO:0003743                      | translation initiation factor activity                                      |
| 1929 | GO:0010460                      | positive regulation of heart rate                                           |
| 1930 | GO:0051645                      | Golgi localization                                                          |
| 1931 | GO:0045333                      | cellular respiration                                                        |
| 1932 | GO:0034641                      | cellular nitrogen compound metabolic process                                |
| 1933 | GO:0017154                      | semaphorin receptor activity                                                |
| 1934 | GO:0032680                      | regulation of tumor necrosis factor production                              |
| 1935 | GO:0071541                      | eukaryotic translation initiation factor 3<br>complex, eIF3m                |
| 1936 | GO:0016469                      | proton-transporting two-sector ATPase complex                               |
| 1937 | GO:0051642                      | centrosome localization                                                     |
| 1938 | GO:0003416                      | endochondral bone growth                                                    |
| 1939 | GO:0030532                      | small nuclear ribonucleoprotein complex                                     |
| 1940 | GO:0046449                      | creatinine metabolic process                                                |
| 1941 | GO:0031201                      | SNARE complex                                                               |
| 1942 | GO:0060244                      | negative regulation of cell proliferation involved<br>in contact inhibition |
| 1943 | GO:0016079                      | synaptic vesicle exocytosis                                                 |
| 1944 | GO:0042274                      | ribosomal small subunit biogenesis                                          |
| 1945 | GO:0035869                      | ciliary transition zone                                                     |
| 1946 | GO:0009266                      | response to temperature stimulus                                            |
| 1947 | GO:0016941                      | natriuretic peptide receptor activity                                       |
| 1948 | GO:0005683                      | U7 snRNP                                                                    |
| 1949 | GO:0010942                      | positive regulation of cell death                                           |
| 1950 | KEGG:Autoimmune_thyroid_disease |                                                                             |
| 1951 | GO:0051087                      | chaperone binding                                                           |
| 1952 | GO:0036297                      | interstrand cross-link repair                                               |
| 1953 | GO:0016841                      | ammonia-lyase activity                                                      |
| 1954 | GO:0042273                      | ribosomal large subunit biogenesis                                          |
| 1955 | GO:0014070                      | response to organic cyclic compound                                         |
| 1956 | GO:2000824                      | negative regulation of androgen receptor activity                           |
| 1957 | GO:0003310                      | pancreatic A cell differentiation                                           |
| 1958 | GO:0030214                      | hyaluronan catabolic process                                                |
| 1959 | GO:0042116                      | macrophage activation                                                       |
| 1960 | GO:0032099                      | negative regulation of appetite                                             |
| 1961 | GO:0001562                      | response to protozoan                                                       |
| 1962 | GO:0005852                      | eukaryotic translation initiation factor 3<br>complex                       |

|      |                          |                                                             |
|------|--------------------------|-------------------------------------------------------------|
| 1963 | GO:0016447               | somatic recombination of immunoglobulin gene segments       |
| 1964 | GO:0048813               | dendrite morphogenesis                                      |
| 1965 | GO:0061379               | inferior colliculus development                             |
| 1966 | GO:0045113               | regulation of integrin biosynthetic process                 |
| 1967 | GO:0016222               | procollagen-proline 4-dioxygenase complex                   |
| 1968 | GO:0016525               | negative regulation of angiogenesis                         |
| 1969 | KEGG:Parkinson_s_disease |                                                             |
| 1970 | GO:0045639               | positive regulation of myeloid cell differentiation         |
| 1971 | GO:0035092               | sperm chromatin condensation                                |
| 1972 | GO:0072197               | ureter morphogenesis                                        |
| 1973 | GO:2001020               | regulation of response to DNA damage stimulus               |
| 1974 | GO:0014737               | positive regulation of muscle atrophy                       |
| 1975 | GO:0005840               | ribosome                                                    |
| 1976 | GO:0045191               | regulation of isotype switching                             |
| 1977 | GO:0003171               | atrioventricular valve development                          |
| 1978 | GO:1901605               | alpha-amino acid metabolic process                          |
| 1979 | GO:0072686               | mitotic spindle                                             |
| 1980 | GO:0030742               | GTP-dependent protein binding                               |
| 1981 | GO:2000195               | negative regulation of female gonad development             |
| 1982 | GO:0050786               | RAGE receptor binding                                       |
| 1983 | GO:0022904               | respiratory electron transport chain                        |
| 1984 | GO:0009611               | response to wounding                                        |
| 1985 | GO:0006771               | riboflavin metabolic process                                |
| 1986 | GO:0008398               | sterol 14-demethylase activity                              |
| 1987 | GO:0061325               | cell proliferation involved in outflow tract morphogenesis  |
| 1988 | GO:0072563               | endothelial microparticle                                   |
| 1989 | GO:0015935               | small ribosomal subunit                                     |
| 1990 | GO:0030663               | COPI-coated vesicle membrane                                |
| 1991 | GO:0006710               | androgen catabolic process                                  |
| 1992 | GO:0001824               | blastocyst development                                      |
| 1993 | GO:0032637               | interleukin-8 production                                    |
| 1994 | GO:0005923               | tight junction                                              |
| 1995 | GO:0016505               | peptidase activator activity involved in apoptotic process  |
| 1996 | GO:0070033               | synaptobrevin<br>2-SNAP-25-syntaxin-1a-complexin II complex |
| 1997 | GO:0006446               | regulation of translational initiation                      |
| 1998 | GO:0043031               | negative regulation of macrophage activation                |
| 1999 | GO:0046685               | response to arsenic-containing substance                    |
| 2000 | GO:0050921               | positive regulation of chemotaxis                           |

|      |                                          |                                                                                                   |
|------|------------------------------------------|---------------------------------------------------------------------------------------------------|
| 2001 | KEGG:Primary_bile_acid_biosynthesis      |                                                                                                   |
| 2002 | GO:0050891                               | multicellular organismal water homeostasis                                                        |
| 2003 | GO:0007128                               | meiotic prophase I                                                                                |
| 2004 | GO:0071310                               | cellular response to organic substance                                                            |
| 2005 | GO:0072040                               | negative regulation of mesenchymal cell<br>apoptotic process involved in nephron<br>morphogenesis |
| 2006 | GO:0045906                               | negative regulation of vasoconstriction                                                           |
| 2007 | GO:0017101                               | aminoacyl-tRNA synthetase multienzyme<br>complex                                                  |
| 2008 | GO:0006413                               | translational initiation                                                                          |
| 2009 | GO:0008272                               | sulfate transport                                                                                 |
| 2010 | GO:0060760                               | positive regulation of response to cytokine<br>stimulus                                           |
| 2011 | GO:0047066                               | phospholipid-hydroperoxide glutathione<br>peroxidase activity                                     |
| 2012 | GO:0007507                               | heart development                                                                                 |
| 2013 | KEGG:Endometrial_cancer                  |                                                                                                   |
| 2014 | GO:0071731                               | response to nitric oxide                                                                          |
| 2015 | KEGG:Terpenoid_backbone_biosynthesi<br>s |                                                                                                   |
| 2016 | GO:1990089                               | response to nerve growth factor                                                                   |
| 2017 | GO:0019083                               | viral transcription                                                                               |
| 2018 | GO:0015116                               | sulfate transmembrane transporter activity                                                        |
| 2019 | GO:0031228                               | intrinsic component of Golgi membrane                                                             |
| 2020 | GO:0035988                               | chondrocyte proliferation                                                                         |
| 2021 | GO:0032849                               | positive regulation of cellular pH reduction                                                      |
| 2022 | GO:0016358                               | dendrite development                                                                              |
| 2023 | GO:0000407                               | pre-autophagosomal structure                                                                      |
| 2024 | GO:0048752                               | semicircular canal morphogenesis                                                                  |
| 2025 | GO:0022900                               | electron transport chain                                                                          |
| 2026 | GO:0004998                               | transferrin receptor activity                                                                     |
| 2027 | GO:0035360                               | positive regulation of peroxisome proliferator<br>activated receptor signaling pathway            |
| 2028 | GO:0031427                               | response to methotrexate                                                                          |
| 2029 | GO:0000166                               | nucleotide binding                                                                                |
| 2030 | GO:0019058                               | viral life cycle                                                                                  |
| 2031 | GO:0021570                               | rhombomere 4 development                                                                          |
| 2032 | GO:0001076                               | RNA polymerase II transcription factor binding<br>transcription factor activity                   |
| 2033 | GO:0016021                               | integral component of membrane                                                                    |
| 2034 | GO:1901031                               | regulation of response to reactive oxygen<br>species                                              |
| 2035 | GO:0045920                               | negative regulation of exocytosis                                                                 |

|      |                                         |                                                                         |
|------|-----------------------------------------|-------------------------------------------------------------------------|
| 2036 | GO:0048705                              | skeletal system morphogenesis                                           |
| 2037 | GO:0031247                              | actin rod assembly                                                      |
| 2038 | GO:0030529                              | ribonucleoprotein complex                                               |
| 2039 | GO:0061193                              | taste bud development                                                   |
| 2040 | GO:0071621                              | granulocyte chemotaxis                                                  |
| 2041 | GO:0021571                              | rhombomere 5 development                                                |
| 2042 | GO:0034437                              | glycoprotein transporter activity                                       |
| 2043 | KEGG:Long_term_depression               |                                                                         |
| 2044 | GO:0005055                              | laminin receptor activity                                               |
| 2045 | GO:0048468                              | cell development                                                        |
| 2046 | GO:0060203                              | clathrin-sculpted glutamate transport vesicle membrane                  |
| 2047 | GO:0030207                              | chondroitin sulfate catabolic process                                   |
| 2048 | GO:0060025                              | regulation of synaptic activity                                         |
| 2049 | GO:0014009                              | glial cell proliferation                                                |
| 2050 | GO:0006999                              | nuclear pore organization                                               |
| 2051 | GO:0016070                              | RNA metabolic process                                                   |
| 2052 | GO:0044252                              | negative regulation of multicellular organismal metabolic process       |
| 2053 | GO:0030235                              | nitric-oxide synthase regulator activity                                |
| 2054 | GO:0014895                              | smooth muscle hypertrophy                                               |
| 2055 | GO:0021754                              | facial nucleus development                                              |
| 2056 | KEGG:Vascular_smooth_muscle_contraction |                                                                         |
| 2057 | GO:0021771                              | lateral geniculate nucleus development                                  |
| 2058 | GO:0005589                              | collagen type VI                                                        |
| 2059 | GO:0030424                              | axon                                                                    |
| 2060 | GO:0050656                              | 3'-phosphoadenosine 5'-phosphosulfate binding                           |
| 2061 | GO:0003723                              | RNA binding                                                             |
| 2062 | GO:0021871                              | forebrain regionalization                                               |
| 2063 | GO:0060297                              | regulation of sarcomere organization                                    |
| 2064 | GO:0051668                              | localization within membrane                                            |
| 2065 | GO:0003106                              | negative regulation of glomerular filtration by angiotensin             |
| 2066 | GO:0046832                              | negative regulation of RNA export from nucleus                          |
| 2067 | GO:0090327                              | negative regulation of locomotion involved in locomotory behavior       |
| 2068 | GO:0033007                              | negative regulation of mast cell activation involved in immune response |
| 2069 | GO:0042622                              | photoreceptor outer segment membrane                                    |
| 2070 | KEGG:Vitamin_B6_metabolism              |                                                                         |
| 2071 | GO:0045652                              | regulation of megakaryocyte differentiation                             |
| 2072 | GO:0003166                              | bundle of His development                                               |
| 2073 | GO:0061138                              | morphogenesis of a branching epithelium                                 |

|      |                                |                                                                                                                                 |
|------|--------------------------------|---------------------------------------------------------------------------------------------------------------------------------|
| 2074 | GO:0031651                     | negative regulation of heat generation                                                                                          |
| 2075 | GO:0005578                     | proteinaceous extracellular matrix                                                                                              |
| 2076 | GO:0000445                     | THO complex part of transcription export complex                                                                                |
| 2077 | GO:0035928                     | rRNA import into mitochondrion                                                                                                  |
| 2078 | GO:0031380                     | nuclear RNA-directed RNA polymerase complex                                                                                     |
| 2079 | GO:0072347                     | response to anesthetic                                                                                                          |
| 2080 | GO:0050688                     | regulation of defense response to virus                                                                                         |
| 2081 | GO:0070075                     | tear secretion                                                                                                                  |
| 2082 | GO:0016524                     | latrotoxin receptor activity                                                                                                    |
| 2083 | KEGG:Bladder_cancer            |                                                                                                                                 |
| 2084 | GO:2001016                     | positive regulation of skeletal muscle cell differentiation                                                                     |
| 2085 | KEGG:Graft_versus_host_disease |                                                                                                                                 |
| 2086 | GO:0030910                     | olfactory placode formation                                                                                                     |
| 2087 | GO:0033065                     | Rad51C-XRCC3 complex                                                                                                            |
| 2088 | GO:0016765                     | transferase activity, transferring alkyl or aryl (other than methyl) groups                                                     |
| 2089 | GO:0040030                     | regulation of molecular function, epigenetic                                                                                    |
| 2090 | GO:0006935                     | chemotaxis                                                                                                                      |
| 2091 | GO:0016486                     | peptide hormone processing                                                                                                      |
| 2092 | GO:0060049                     | regulation of protein glycosylation                                                                                             |
| 2093 | GO:0071910                     | determination of liver left/right asymmetry                                                                                     |
| 2094 | GO:0072233                     | metanephric thick ascending limb development                                                                                    |
| 2095 | GO:0043515                     | kinetochore binding                                                                                                             |
| 2096 | GO:0031589                     | cell-substrate adhesion                                                                                                         |
| 2097 | KEGG:Type_I_diabetes_mellitus  |                                                                                                                                 |
| 2098 | GO:0019516                     | lactate oxidation                                                                                                               |
| 2099 | GO:0014894                     | response to denervation involved in regulation of muscle adaptation                                                             |
| 2100 | GO:2000253                     | positive regulation of feeding behavior                                                                                         |
| 2101 | GO:0000347                     | THO complex                                                                                                                     |
| 2102 | GO:0009636                     | response to toxic substance                                                                                                     |
| 2103 | GO:0006996                     | organelle organization                                                                                                          |
| 2104 | GO:2000313                     | regulation of fibroblast growth factor receptor signaling pathway involved in neural plate anterior/posterior pattern formation |
| 2105 | GO:0031105                     | septin complex                                                                                                                  |
| 2106 | GO:0016570                     | histone modification                                                                                                            |
| 2107 | GO:0031901                     | early endosome membrane                                                                                                         |
| 2108 | GO:0005641                     | nuclear envelope lumen                                                                                                          |
| 2109 | GO:0051702                     | interaction with symbiont                                                                                                       |
| 2110 | GO:0021889                     | olfactory bulb interneuron differentiation                                                                                      |

|      |                          |                                                                             |
|------|--------------------------|-----------------------------------------------------------------------------|
| 2111 | GO:0005850               | eukaryotic translation initiation factor 2 complex                          |
| 2112 | GO:0019948               | SUMO activating enzyme activity                                             |
| 2113 | GO:0019888               | protein phosphatase regulator activity                                      |
| 2114 | GO:0022408               | negative regulation of cell-cell adhesion                                   |
| 2115 | GO:0016445               | somatic diversification of immunoglobulins                                  |
| 2116 | GO:0090193               | positive regulation of glomerulus development                               |
| 2117 | GO:0003185               | sinoatrial valve morphogenesis                                              |
| 2118 | GO:0019865               | immunoglobulin binding                                                      |
| 2119 | GO:0009609               | response to symbiotic bacterium                                             |
| 2120 | GO:0005527               | macrolide binding                                                           |
| 2121 | GO:0030947               | regulation of vascular endothelial growth factor receptor signaling pathway |
| 2122 | GO:0060280               | negative regulation of ovulation                                            |
| 2123 | GO:0000722               | telomere maintenance via recombination                                      |
| 2124 | GO:0021510               | spinal cord development                                                     |
| 2125 | GO:0040037               | negative regulation of fibroblast growth factor receptor signaling pathway  |
| 2126 | GO:0035562               | negative regulation of chromatin binding                                    |
| 2127 | GO:0017059               | serine C-palmitoyltransferase complex                                       |
| 2128 | KEGG:Allograft_rejection |                                                                             |
| 2129 | GO:0016176               | superoxide-generating NADPH oxidase activator activity                      |
| 2130 | GO:0003954               | NADH dehydrogenase activity                                                 |
| 2131 | GO:0032947               | protein complex scaffold                                                    |
| 2132 | GO:0045143               | homologous chromosome segregation                                           |
| 2133 | GO:0045040               | protein import into mitochondrial outer membrane                            |
| 2134 | GO:0043083               | synaptic cleft                                                              |
| 2135 | GO:0010591               | regulation of lamellipodium assembly                                        |
| 2136 | GO:0042765               | GPI-anchor transamidase complex                                             |
| 2137 | GO:1900276               | regulation of proteinase activated receptor activity                        |
| 2138 | GO:0051781               | positive regulation of cell division                                        |
| 2139 | GO:0001867               | complement activation, lectin pathway                                       |
| 2140 | GO:0045179               | apical cortex                                                               |
| 2141 | GO:0071598               | neuronal ribonucleoprotein granule                                          |
| 2142 | GO:0097167               | circadian regulation of translation                                         |
| 2143 | GO:0003923               | GPI-anchor transamidase activity                                            |
| 2144 | GO:0044065               | regulation of respiratory system process                                    |
| 2145 | GO:0048565               | digestive tract development                                                 |
| 2146 | GO:0042612               | MHC class I protein complex                                                 |
| 2147 | GO:0010035               | response to inorganic substance                                             |
| 2148 | GO:0043022               | ribosome binding                                                            |

|      |                            |                                                                 |
|------|----------------------------|-----------------------------------------------------------------|
| 2149 | GO:0043620                 | regulation of DNA-templated transcription in response to stress |
| 2150 | GO:0005664                 | nuclear origin of replication recognition complex               |
| 2151 | GO:0061053                 | somite development                                              |
| 2152 | GO:0002944                 | cyclin K-CDK12 complex                                          |
| 2153 | GO:0048566                 | embryonic digestive tract development                           |
| 2154 | GO:0050902                 | leukocyte adhesive activation                                   |
| 2155 | GO:0001832                 | blastocyst growth                                               |
| 2156 | GO:0030915                 | Smc5-Smc6 complex                                               |
| 2157 | GO:0045840                 | positive regulation of mitosis                                  |
| 2158 | GO:0045261                 | proton-transporting ATP synthase complex, catalytic core F(1)   |
| 2159 | GO:0001916                 | positive regulation of T cell mediated cytotoxicity             |
| 2160 | GO:0070438                 | mTOR-FKBP12-rapamycin complex                                   |
| 2161 | KEGG:Purine_metabolism     |                                                                 |
| 2162 | GO:0060126                 | somatotropin secreting cell differentiation                     |
| 2163 | GO:0043062                 | extracellular structure organization                            |
| 2164 | GO:0002046                 | opsin binding                                                   |
| 2165 | GO:0042731                 | PH domain binding                                               |
| 2166 | GO:0042834                 | peptidoglycan binding                                           |
| 2167 | GO:0031523                 | Myb complex                                                     |
| 2168 | GO:0005697                 | telomerase holoenzyme complex                                   |
| 2169 | GO:0045112                 | integrin biosynthetic process                                   |
| 2170 | GO:0055087                 | Ski complex                                                     |
| 2171 | GO:0009892                 | negative regulation of metabolic process                        |
| 2172 | GO:0014889                 | muscle atrophy                                                  |
| 2173 | KEGG:Pyrimidine_metabolism |                                                                 |
| 2174 | GO:0032958                 | inositol phosphate biosynthetic process                         |
| 2175 | GO:0061072                 | iris morphogenesis                                              |
| 2176 | GO:0021516                 | dorsal spinal cord development                                  |
| 2177 | GO:0043610                 | regulation of carbohydrate utilization                          |
| 2178 | GO:0021514                 | ventral spinal cord interneuron differentiation                 |
| 2179 | GO:0044308                 | axonal spine                                                    |
| 2180 | GO:0003420                 | regulation of growth plate cartilage chondrocyte proliferation  |
| 2181 | GO:2000491                 | positive regulation of hepatic stellate cell activation         |
| 2182 | GO:0030695                 | GTPase regulator activity                                       |
| 2183 | GO:0030574                 | collagen catabolic process                                      |
| 2184 | GO:0016817                 | hydrolase activity, acting on acid anhydrides                   |
| 2185 | GO:0060421                 | positive regulation of heart growth                             |
| 2186 | GO:0021855                 | hypothalamus cell migration                                     |

|      |            |                                                                                        |
|------|------------|----------------------------------------------------------------------------------------|
| 2187 | GO:0000808 | origin recognition complex                                                             |
| 2188 | GO:0016768 | spermine synthase activity                                                             |
| 2189 | GO:0006109 | regulation of carbohydrate metabolic process                                           |
| 2190 | GO:0060872 | semicircular canal development                                                         |
| 2191 | GO:0007632 | visual behavior                                                                        |
| 2192 | GO:0001179 | RNA polymerase I transcription factor binding                                          |
| 2193 | GO:0016442 | RISC complex                                                                           |
| 2194 | GO:0021707 | cerebellar granule cell differentiation                                                |
| 2195 | GO:0005584 | collagen type I                                                                        |
| 2196 | GO:0044297 | cell body                                                                              |
| 2197 | GO:0005898 | interleukin-13 receptor complex                                                        |
| 2198 | GO:0001505 | regulation of neurotransmitter levels                                                  |
| 2199 | GO:0070345 | negative regulation of fat cell proliferation                                          |
|      |            | regulation of inositol                                                                 |
| 2200 | GO:0031585 | 1,4,5-trisphosphate-sensitive calcium-release channel activity                         |
|      |            | forebrain ventricular zone progenitor cell division                                    |
| 2201 | GO:0021869 |                                                                                        |
|      |            | regulation of toll-like receptor signaling pathway                                     |
| 2202 | GO:0034121 |                                                                                        |
|      |            | collagen type V                                                                        |
| 2203 | GO:0005588 |                                                                                        |
| 2204 | GO:1990075 | periciliary membrane compartment                                                       |
| 2205 | GO:0002118 | aggressive behavior                                                                    |
| 2206 | GO:0006097 | glyoxylate cycle                                                                       |
| 2207 | GO:0003195 | tricuspid valve formation                                                              |
| 2208 | GO:0032330 | regulation of chondrocyte differentiation                                              |
| 2209 | GO:0008559 | xenobiotic-transporting ATPase activity                                                |
| 2210 | GO:0007155 | cell adhesion                                                                          |
|      |            | positive regulation of pigment cell differentiation                                    |
| 2211 | GO:0050942 |                                                                                        |
|      |            | negative regulation of transmission of nerve impulse                                   |
| 2212 | GO:0051970 |                                                                                        |
|      |            | nuclear stress granule                                                                 |
| 2213 | GO:0097165 |                                                                                        |
| 2214 | GO:0044691 | tooth eruption                                                                         |
|      |            | positive regulation of intrinsic apoptotic signaling pathway in response to DNA damage |
| 2215 | GO:1902231 |                                                                                        |
|      |            | alphav-beta3 integrin-vitronectin complex                                              |
| 2216 | GO:0071062 |                                                                                        |
| 2217 | GO:0051409 | response to nitrosative stress                                                         |
| 2218 | GO:0005905 | coated pit                                                                             |
| 2219 | GO:0030317 | sperm motility                                                                         |
| 2220 | GO:0007611 | learning or memory                                                                     |
| 2221 | GO:0005779 | integral component of peroxisomal membrane                                             |
| 2222 | GO:0033631 | cell-cell adhesion mediated by integrin                                                |
| 2223 | GO:0030904 | retromer complex                                                                       |



|      |            |                                                           |
|------|------------|-----------------------------------------------------------|
| 2224 | GO:0035686 | sperm fibrous sheath                                      |
| 2225 | GO:0046982 | protein heterodimerization activity                       |
| 2226 | GO:0035229 | positive regulation of glutamate-cysteine ligase activity |
| 2227 | GO:0031205 | endoplasmic reticulum Sec complex                         |
| 2228 | GO:0017162 | aryl hydrocarbon receptor binding                         |
| 2229 | GO:0008541 | proteasome regulatory particle, lid subcomplex            |
| 2230 | GO:0030061 | mitochondrial crista                                      |
| 2231 | GO:0035226 | glutamate-cysteine ligase catalytic subunit binding       |
| 2232 | GO:0038061 | NIK/NF-kappaB signaling                                   |
| 2233 | GO:0002922 | positive regulation of humoral immune response            |
| 2234 | GO:0045730 | respiratory burst                                         |
| 2235 | GO:0008609 | alkylglycerone-phosphate synthase activity                |
| 2236 | GO:0030239 | myofibril assembly                                        |
| 2237 | GO:0090166 | Golgi disassembly                                         |
| 2238 | GO:0070051 | fibrinogen binding                                        |
| 2239 | GO:0097542 | ciliary tip                                               |
| 2240 | GO:0019430 | removal of superoxide radicals                            |
| 2241 | GO:0048870 | cell motility                                             |
| 2242 | GO:0015837 | amine transport                                           |
| 2243 | GO:0070628 | proteasome binding                                        |
| 2244 | GO:0007620 | copulation                                                |
| 2245 | GO:0050746 | regulation of lipoprotein metabolic process               |
| 2246 | GO:0007431 | salivary gland development                                |
| 2247 | GO:0010822 | positive regulation of mitochondrion organization         |
| 2248 | GO:0046784 | viral mRNA export from host cell nucleus                  |
| 2249 | GO:0043020 | NADPH oxidase complex                                     |
| 2250 | GO:0061038 | uterus morphogenesis                                      |
| 2251 | GO:0017109 | glutamate-cysteine ligase complex                         |
| 2252 | GO:0070576 | vitamin D 24-hydroxylase activity                         |
| 2253 | GO:0032388 | positive regulation of intracellular transport            |
| 2254 | GO:0009330 | DNA topoisomerase complex (ATP-hydrolyzing)               |

---

Supplementary Table S3

| GeneID          | Name     | Description                                                                                                                                 |
|-----------------|----------|---------------------------------------------------------------------------------------------------------------------------------------------|
| ENSG00000000938 | FGR      | FGR proto-oncogene, Src family tyrosine kinase<br>[Source:HGNC Symbol;Acc:HGNC:3697]<br>cystic fibrosis transmembrane conductance regulator |
| ENSG00000001626 | CFTR     | (ATP-binding cassette sub-family C, member 7)<br>[Source:HGNC Symbol;Acc:HGNC:1884]                                                         |
| ENSG00000004468 | CD38     | CD38 molecule [Source:HGNC Symbol;Acc:HGNC:1667]                                                                                            |
| ENSG00000004848 | ARX      | aristaless related homeobox [Source:HGNC<br>Symbol;Acc:HGNC:18060]                                                                          |
| ENSG00000005381 | MPO      | myeloperoxidase [Source:HGNC Symbol;Acc:HGNC:7218]                                                                                          |
| ENSG00000007908 | SELE     | selectin E [Source:HGNC Symbol;Acc:HGNC:10718]                                                                                              |
| ENSG00000008018 | PSMB1    | proteasome (prosome, macropain) subunit, beta type, 1<br>[Source:HGNC Symbol;Acc:HGNC:9537]                                                 |
| ENSG00000010278 | CD9      | CD9 molecule [Source:HGNC Symbol;Acc:HGNC:1709]                                                                                             |
| ENSG00000010610 | CD4      | CD4 molecule [Source:HGNC Symbol;Acc:HGNC:1678]                                                                                             |
| ENSG00000011422 | PLAUR    | plasminogen activator, urokinase receptor [Source:HGNC<br>Symbol;Acc:HGNC:9053]                                                             |
| ENSG00000011465 | DCN      | decorin [Source:HGNC Symbol;Acc:HGNC:2705]                                                                                                  |
| ENSG00000012048 | BRCA1    | breast cancer 1, early onset [Source:HGNC<br>Symbol;Acc:HGNC:1100]                                                                          |
| ENSG00000012124 | CD22     | CD22 molecule [Source:HGNC Symbol;Acc:HGNC:1643]                                                                                            |
| ENSG00000017427 | IGF1     | insulin-like growth factor 1 (somatomedin C) [Source:HGNC<br>Symbol;Acc:HGNC:5464]                                                          |
| ENSG00000019549 | SNAI2    | snail family zinc finger 2 [Source:HGNC<br>Symbol;Acc:HGNC:11094]                                                                           |
| ENSG00000020633 | RUNX3    | runt-related transcription factor 3 [Source:HGNC<br>Symbol;Acc:HGNC:10473]                                                                  |
| ENSG00000020922 | MRE11A   | MRE11 meiotic recombination 11 homolog A ( <i>S. cerevisiae</i> )<br>[Source:HGNC Symbol;Acc:HGNC:7230]                                     |
| ENSG00000021461 | CYP3A43  | cytochrome P450, family 3, subfamily A, polypeptide 43<br>[Source:HGNC Symbol;Acc:HGNC:17450]                                               |
| ENSG00000025423 | HSD17B6  | hydroxysteroid (17-beta) dehydrogenase 6 [Source:HGNC<br>Symbol;Acc:HGNC:23316]                                                             |
| ENSG00000026508 | CD44     | CD44 molecule (Indian blood group) [Source:HGNC<br>Symbol;Acc:HGNC:1681]                                                                    |
| ENSG00000028137 | TNFRSF1B | tumor necrosis factor receptor superfamily, member 1B<br>[Source:HGNC Symbol;Acc:HGNC:11917]                                                |
| ENSG00000029534 | ANK1     | ankyrin 1, erythrocytic [Source:HGNC<br>Symbol;Acc:HGNC:492]                                                                                |
| ENSG00000036549 | ZZZ3     | zinc finger, ZZ-type containing 3 [Source:HGNC<br>Symbol;Acc:HGNC:24523]                                                                    |
| ENSG00000037280 | FLT4     | fms-related tyrosine kinase 4 [Source:HGNC<br>Symbol;Acc:HGNC:3767]                                                                         |

|                 |        |                                                                                                                          |
|-----------------|--------|--------------------------------------------------------------------------------------------------------------------------|
| ENSG00000037965 | HOXC8  | homeobox C8 [Source:HGNC Symbol;Acc:HGNC:5129]                                                                           |
| ENSG00000039068 | CDH1   | cadherin 1, type 1, E-cadherin (epithelial) [Source:HGNC Symbol;Acc:HGNC:1748]                                           |
| ENSG00000041357 | PSMA4  | proteasome (prosome, macropain) subunit, alpha type, 4 [Source:HGNC Symbol;Acc:HGNC:9533]                                |
| ENSG00000043462 | LCP2   | lymphocyte cytosolic protein 2 (SH2 domain containing leukocyte protein of 76kDa) [Source:HGNC Symbol;Acc:HGNC:6529]     |
| ENSG00000047315 | POLR2B | polymerase (RNA) II (DNA directed) polypeptide B, 140kDa [Source:HGNC Symbol;Acc:HGNC:9188]                              |
| ENSG00000047457 | CP     | ceruloplasmin (ferroxidase) [Source:HGNC Symbol;Acc:HGNC:2295]                                                           |
| ENSG00000047849 | MAP4   | microtubule-associated protein 4 [Source:HGNC Symbol;Acc:HGNC:6862]                                                      |
| ENSG00000054598 | FOXC1  | forkhead box C1 [Source:HGNC Symbol;Acc:HGNC:3800]                                                                       |
| ENSG00000055118 | KCNH2  | potassium voltage-gated channel, subfamily H (eag-related), member 2 [Source:HGNC Symbol;Acc:HGNC:6251]                  |
| ENSG00000063660 | GPC1   | glypican 1 [Source:HGNC Symbol;Acc:HGNC:4449]                                                                            |
| ENSG00000064300 | NGFR   | nerve growth factor receptor [Source:HGNC Symbol;Acc:HGNC:7809]                                                          |
| ENSG00000066336 | SPI1   | Spi-1 proto-oncogene [Source:HGNC Symbol;Acc:HGNC:11241]                                                                 |
| ENSG00000067646 | ZFY    | zinc finger protein, Y-linked [Source:HGNC Symbol;Acc:HGNC:12870]                                                        |
| ENSG00000068024 | HDAC4  | histone deacetylase 4 [Source:HGNC Symbol;Acc:HGNC:14063]                                                                |
| ENSG00000069956 | MAPK6  | mitogen-activated protein kinase 6 [Source:HGNC Symbol;Acc:HGNC:6879]                                                    |
| ENSG00000070018 | LRP6   | low density lipoprotein receptor-related protein 6 [Source:HGNC Symbol;Acc:HGNC:6698]                                    |
| ENSG00000070193 | FGF10  | fibroblast growth factor 10 [Source:HGNC Symbol;Acc:HGNC:3666]                                                           |
| ENSG00000070831 | CDC42  | cell division cycle 42 [Source:HGNC Symbol;Acc:HGNC:1736]                                                                |
| ENSG00000073756 | PTGS2  | prostaglandin-endoperoxide synthase 2 (prostaglandin G/H synthase and cyclooxygenase) [Source:HGNC Symbol;Acc:HGNC:9605] |
| ENSG00000075618 | FSCN1  | fascin actin-bundling protein 1 [Source:HGNC Symbol;Acc:HGNC:11148]                                                      |
| ENSG00000076242 | MLH1   | mutL homolog 1 [Source:HGNC Symbol;Acc:HGNC:7127]                                                                        |
| ENSG00000076248 | UNG    | uracil-DNA glycosylase [Source:HGNC Symbol;Acc:HGNC:12572]                                                               |
| ENSG00000078401 | EDN1   | endothelin 1 [Source:HGNC Symbol;Acc:HGNC:3176]                                                                          |
| ENSG00000080166 | DCT    | dopachrome tautomerase [Source:HGNC                                                                                      |

|                 |        |                                                                                                  |
|-----------------|--------|--------------------------------------------------------------------------------------------------|
|                 |        | Symbol;Acc:HGNC:2709]                                                                            |
| ENSG00000081051 | AFP    | alpha-fetoprotein [Source:HGNC Symbol;Acc:HGNC:317]                                              |
| ENSG00000082153 | BZW1   | basic leucine zipper and W2 domains 1 [Source:HGNC<br>Symbol;Acc:HGNC:18380]                     |
| ENSG00000082175 | PGR    | progesterone receptor [Source:HGNC<br>Symbol;Acc:HGNC:8910]                                      |
| ENSG00000083123 | BCKDHB | branched chain keto acid dehydrogenase E1, beta polypeptide<br>[Source:HGNC Symbol;Acc:HGNC:987] |
| ENSG00000084207 | GSTP1  | glutathione S-transferase pi 1 [Source:HGNC<br>Symbol;Acc:HGNC:4638]                             |
| ENSG00000085276 | MECOM  | MDS1 and EVI1 complex locus [Source:HGNC<br>Symbol;Acc:HGNC:3498]                                |
| ENSG00000085465 | OVGP1  | oviductal glycoprotein 1, 120kDa [Source:HGNC<br>Symbol;Acc:HGNC:8524]                           |
| ENSG00000085563 | ABCB1  | ATP-binding cassette, sub-family B (MDR/TAP), member 1<br>[Source:HGNC Symbol;Acc:HGNC:40]       |
| ENSG00000085662 | AKR1B1 | aldo-keto reductase family 1, member B1 (aldose reductase)<br>[Source:HGNC Symbol;Acc:HGNC:381]  |
| ENSG00000087088 | BAX    | BCL2-associated X protein [Source:HGNC<br>Symbol;Acc:HGNC:959]                                   |
| ENSG00000087111 | PIGS   | phosphatidylinositol glycan anchor biosynthesis, class S<br>[Source:HGNC Symbol;Acc:HGNC:14937]  |
| ENSG00000087191 | PSMC5  | proteasome (prosome, macropain) 26S subunit, ATPase, 5<br>[Source:HGNC Symbol;Acc:HGNC:9552]     |
| ENSG00000087250 | MT3    | metallothionein 3 [Source:HGNC Symbol;Acc:HGNC:7408]                                             |
| ENSG00000087586 | AURKA  | aurora kinase A [Source:HGNC Symbol;Acc:HGNC:11393]                                              |
| ENSG00000088832 | FKBP1A | FK506 binding protein 1A, 12kDa [Source:HGNC<br>Symbol;Acc:HGNC:3711]                            |
| ENSG00000089902 | RCOR1  | REST corepressor 1 [Source:HGNC<br>Symbol;Acc:HGNC:17441]                                        |
| ENSG00000090104 | RGS1   | regulator of G-protein signaling 1 [Source:HGNC<br>Symbol;Acc:HGNC:9991]                         |
| ENSG00000090339 | ICAM1  | intercellular adhesion molecule 1 [Source:HGNC<br>Symbol;Acc:HGNC:5344]                          |
| ENSG00000091831 | ESR1   | estrogen receptor 1 [Source:HGNC Symbol;Acc:HGNC:3467]                                           |
| ENSG00000092847 | AGO1   | argonaute RISC catalytic component 1 [Source:HGNC<br>Symbol;Acc:HGNC:3262]                       |
| ENSG00000092969 | TGFB2  | transforming growth factor, beta 2 [Source:HGNC<br>Symbol;Acc:HGNC:11768]                        |
| ENSG00000094880 | CDC23  | cell division cycle 23 [Source:HGNC<br>Symbol;Acc:HGNC:1724]                                     |
| ENSG00000096717 | SIRT1  | sirtuin 1 [Source:HGNC Symbol;Acc:HGNC:14929]                                                    |
| ENSG00000096968 | JAK2   | Janus kinase 2 [Source:HGNC Symbol;Acc:HGNC:6192]                                                |
| ENSG00000100030 | MAPK1  | mitogen-activated protein kinase 1 [Source:HGNC                                                  |

|                 |          |                                                                                                                               |
|-----------------|----------|-------------------------------------------------------------------------------------------------------------------------------|
|                 |          | Symbol;Acc:HGNC:6871]                                                                                                         |
| ENSG00000100031 | GGT1     | gamma-glutamyltransferase 1 [Source:HGNC<br>Symbol;Acc:HGNC:4250]                                                             |
| ENSG00000100234 | TIMP3    | TIMP metalloproteinase inhibitor 3 [Source:HGNC<br>Symbol;Acc:HGNC:11822]                                                     |
| ENSG00000100292 | HMOX1    | heme oxygenase (decycling) 1 [Source:HGNC<br>Symbol;Acc:HGNC:5013]                                                            |
| ENSG00000100300 | TSPO     | translocator protein (18kDa) [Source:HGNC<br>Symbol;Acc:HGNC:1158]                                                            |
| ENSG00000100311 | PDGFB    | platelet-derived growth factor beta polypeptide [Source:HGNC<br>Symbol;Acc:HGNC:8800]                                         |
| ENSG00000100312 | ACR      | acrosin [Source:HGNC Symbol;Acc:HGNC:126]                                                                                     |
| ENSG00000100393 | EP300    | E1A binding protein p300 [Source:HGNC<br>Symbol;Acc:HGNC:3373]                                                                |
| ENSG00000100453 | GZMB     | granzyme B (granzyme 2, cytotoxic T-lymphocyte-associated<br>serine esterase 1) [Source:HGNC Symbol;Acc:HGNC:4709]            |
| ENSG00000100567 | PSMA3    | proteasome (prosome, macropain) subunit, alpha type, 3<br>[Source:HGNC Symbol;Acc:HGNC:9532]                                  |
| ENSG00000100644 | HIF1A    | hypoxia inducible factor 1, alpha subunit (basic helix-loop-helix<br>transcription factor) [Source:HGNC Symbol;Acc:HGNC:4910] |
| ENSG00000100811 | YY1      | YY1 transcription factor [Source:HGNC<br>Symbol;Acc:HGNC:12856]                                                               |
| ENSG00000100842 | EFS      | embryonal Fyn-associated substrate [Source:HGNC<br>Symbol;Acc:HGNC:16898]                                                     |
| ENSG00000101076 | HNF4A    | hepatocyte nuclear factor 4, alpha [Source:HGNC<br>Symbol;Acc:HGNC:5024]                                                      |
| ENSG00000101384 | JAG1     | jagged 1 [Source:HGNC Symbol;Acc:HGNC:6188]                                                                                   |
| ENSG00000101981 | F9       | coagulation factor IX [Source:HGNC<br>Symbol;Acc:HGNC:3551]                                                                   |
| ENSG00000102081 | FMR1     | fragile X mental retardation 1 [Source:HGNC<br>Symbol;Acc:HGNC:3775]                                                          |
| ENSG00000102225 | CDK16    | cyclin-dependent kinase 16 [Source:HGNC<br>Symbol;Acc:HGNC:8749]                                                              |
| ENSG00000102265 | TIMP1    | TIMP metalloproteinase inhibitor 1 [Source:HGNC<br>Symbol;Acc:HGNC:11820]                                                     |
| ENSG00000102524 | TNFSF13B | tumor necrosis factor (ligand) superfamily, member 13b<br>[Source:HGNC Symbol;Acc:HGNC:11929]                                 |
| ENSG00000102981 | PARD6A   | par-6 family cell polarity regulator alpha [Source:HGNC<br>Symbol;Acc:HGNC:15943]                                             |
| ENSG00000103197 | TSC2     | tuberous sclerosis 2 [Source:HGNC<br>Symbol;Acc:HGNC:12363]                                                                   |
| ENSG00000104067 | TJP1     | tight junction protein 1 [Source:HGNC<br>Symbol;Acc:HGNC:11827]                                                               |
| ENSG00000104267 | CA2      | carbonic anhydrase II [Source:HGNC                                                                                            |

|                 |          |                                                                                                                                      |
|-----------------|----------|--------------------------------------------------------------------------------------------------------------------------------------|
|                 |          | Symbol;Acc:HGNC:1373]                                                                                                                |
| ENSG00000104290 | FZD3     | frizzled class receptor 3 [Source:HGNC<br>Symbol;Acc:HGNC:4041]                                                                      |
| ENSG00000104313 | EYA1     | EYA transcriptional coactivator and phosphatase 1<br>[Source:HGNC Symbol;Acc:HGNC:3519]                                              |
| ENSG00000104325 | DECR1    | 2,4-dienoyl CoA reductase 1, mitochondrial [Source:HGNC<br>Symbol;Acc:HGNC:2753]                                                     |
| ENSG00000104368 | PLAT     | plasminogen activator, tissue [Source:HGNC<br>Symbol;Acc:HGNC:9051]                                                                  |
| ENSG00000104419 | NDRG1    | N-myc downstream regulated 1 [Source:HGNC<br>Symbol;Acc:HGNC:7679]                                                                   |
| ENSG00000104432 | IL7      | interleukin 7 [Source:HGNC Symbol;Acc:HGNC:6023]                                                                                     |
| ENSG00000104687 | GSR      | glutathione reductase [Source:HGNC<br>Symbol;Acc:HGNC:4623]                                                                          |
| ENSG00000104889 | RNASEH2A | ribonuclease H2, subunit A [Source:HGNC<br>Symbol;Acc:HGNC:18518]                                                                    |
| ENSG00000105143 | SLC1A6   | solute carrier family 1 (high affinity aspartate/glutamate<br>transporter), member 6 [Source:HGNC<br>Symbol;Acc:HGNC:10944]          |
| ENSG00000105173 | CCNE1    | cyclin E1 [Source:HGNC Symbol;Acc:HGNC:1589]                                                                                         |
| ENSG00000105329 | TGFB1    | transforming growth factor, beta 1 [Source:HGNC<br>Symbol;Acc:HGNC:11766]                                                            |
| ENSG00000105369 | CD79A    | CD79a molecule, immunoglobulin-associated alpha<br>[Source:HGNC Symbol;Acc:HGNC:1698]                                                |
| ENSG00000105372 | RPS19    | ribosomal protein S19 [Source:HGNC<br>Symbol;Acc:HGNC:10402]                                                                         |
| ENSG00000105398 | SULT2A1  | sulfotransferase family, cytosolic, 2A, dehydroepiandrosterone<br>(DHEA)-preferring, member 1 [Source:HGNC<br>Symbol;Acc:HGNC:11458] |
| ENSG00000105697 | HAMP     | hepcidin antimicrobial peptide [Source:HGNC<br>Symbol;Acc:HGNC:15598]                                                                |
| ENSG00000105698 | USF2     | upstream transcription factor 2, c-fos interacting<br>[Source:HGNC Symbol;Acc:HGNC:12594]                                            |
| ENSG00000105819 | PMPCB    | peptidase (mitochondrial processing) beta [Source:HGNC<br>Symbol;Acc:HGNC:9119]                                                      |
| ENSG00000105894 | PTN      | pleiotrophin [Source:HGNC Symbol;Acc:HGNC:9630]                                                                                      |
| ENSG00000105968 | H2AFV    | H2A histone family, member V [Source:HGNC<br>Symbol;Acc:HGNC:20664]                                                                  |
| ENSG00000105989 | WNT2     | wingless-type MMTV integration site family member 2<br>[Source:HGNC Symbol;Acc:HGNC:12780]                                           |
| ENSG00000106258 | CYP3A5   | cytochrome P450, family 3, subfamily A, polypeptide 5<br>[Source:HGNC Symbol;Acc:HGNC:2638]                                          |
| ENSG00000106366 | SERPINE1 | serpin peptidase inhibitor, clade E (nexin, plasminogen<br>activator inhibitor type 1), member 1 [Source:HGNC                        |

|                 |         |                                                                                                 |
|-----------------|---------|-------------------------------------------------------------------------------------------------|
| ENSG00000106546 | AHR     | Symbol;Acc:HGNC:8583]<br>aryl hydrocarbon receptor [Source:HGNC<br>Symbol;Acc:HGNC:348]         |
| ENSG00000106633 | GCK     | glucokinase (hexokinase 4) [Source:HGNC<br>Symbol;Acc:HGNC:4195]                                |
| ENSG00000107317 | PTGDS   | prostaglandin D2 synthase 21kDa (brain) [Source:HGNC<br>Symbol;Acc:HGNC:9592]                   |
| ENSG00000107338 | SHB     | Src homology 2 domain containing adaptor protein B<br>[Source:HGNC Symbol;Acc:HGNC:10838]       |
| ENSG00000107485 | GATA3   | GATA binding protein 3 [Source:HGNC<br>Symbol;Acc:HGNC:4172]                                    |
| ENSG00000107581 | EIF3A   | eukaryotic translation initiation factor 3, subunit A<br>[Source:HGNC Symbol;Acc:HGNC:3271]     |
| ENSG00000107882 | SUFU    | suppressor of fused homolog (Drosophila) [Source:HGNC<br>Symbol;Acc:HGNC:16466]                 |
| ENSG00000108312 | UBTF    | upstream binding transcription factor, RNA polymerase I<br>[Source:HGNC Symbol;Acc:HGNC:12511]  |
| ENSG00000108342 | CSF3    | colony stimulating factor 3 (granulocyte) [Source:HGNC<br>Symbol;Acc:HGNC:2438]                 |
| ENSG00000108561 | C1QBP   | complement component 1, q subcomponent binding protein<br>[Source:HGNC Symbol;Acc:HGNC:1243]    |
| ENSG00000108654 | DDX5    | DEAD (Asp-Glu-Ala-Asp) box helicase 5 [Source:HGNC<br>Symbol;Acc:HGNC:2746]                     |
| ENSG00000108773 | KAT2A   | K(lysine) acetyltransferase 2A [Source:HGNC<br>Symbol;Acc:HGNC:4201]                            |
| ENSG00000108840 | HDAC5   | histone deacetylase 5 [Source:HGNC<br>Symbol;Acc:HGNC:14068]                                    |
| ENSG00000108946 | PRKAR1A | protein kinase, cAMP-dependent, regulatory, type I, alpha<br>[Source:HGNC Symbol;Acc:HGNC:9388] |
| ENSG00000109471 | IL2     | interleukin 2 [Source:HGNC Symbol;Acc:HGNC:6001]                                                |
| ENSG00000109610 | SOD3    | superoxide dismutase 3, extracellular [Source:HGNC<br>Symbol;Acc:HGNC:11181]                    |
| ENSG00000110092 | CCND1   | cyclin D1 [Source:HGNC Symbol;Acc:HGNC:1582]                                                    |
| ENSG00000110448 | CD5     | CD5 molecule [Source:HGNC Symbol;Acc:HGNC:1685]                                                 |
| ENSG00000110492 | MDK     | midkine (neurite growth-promoting factor 2) [Source:HGNC<br>Symbol;Acc:HGNC:6972]               |
| ENSG00000110799 | VWF     | von Willebrand factor [Source:HGNC<br>Symbol;Acc:HGNC:12726]                                    |
| ENSG00000110852 | CLEC2B  | C-type lectin domain family 2, member B [Source:HGNC<br>Symbol;Acc:HGNC:2053]                   |
| ENSG00000111049 | MYF5    | myogenic factor 5 [Source:HGNC Symbol;Acc:HGNC:7565]                                            |
| ENSG00000111057 | KRT18   | keratin 18 [Source:HGNC Symbol;Acc:HGNC:6430]                                                   |
| ENSG00000111144 | LTA4H   | leukotriene A4 hydrolase [Source:HGNC<br>Symbol;Acc:HGNC:6710]                                  |

|                |        |                                                                                                                    |
|----------------|--------|--------------------------------------------------------------------------------------------------------------------|
| ENSG0000011206 | FOXM1  | forkhead box M1 [Source:HGNC Symbol;Acc:HGNC:3818]                                                                 |
| ENSG0000011241 | FGF6   | fibroblast growth factor 6 [Source:HGNC<br>Symbol;Acc:HGNC:3684]                                                   |
| ENSG0000011432 | FZD10  | frizzled class receptor 10 [Source:HGNC<br>Symbol;Acc:HGNC:4039]                                                   |
| ENSG0000011537 | IFNG   | interferon, gamma [Source:HGNC Symbol;Acc:HGNC:5438]                                                               |
| ENSG0000011640 | GAPDH  | glyceraldehyde-3-phosphate dehydrogenase [Source:HGNC<br>Symbol;Acc:HGNC:4141]                                     |
| ENSG0000011642 | CHD4   | chromodomain helicase DNA binding protein 4 [Source:HGNC<br>Symbol;Acc:HGNC:1919]                                  |
| ENSG0000012062 | MAPK14 | mitogen-activated protein kinase 14 [Source:HGNC<br>Symbol;Acc:HGNC:6876]                                          |
| ENSG0000012096 | SOD2   | superoxide dismutase 2, mitochondrial [Source:HGNC<br>Symbol;Acc:HGNC:11180]                                       |
| ENSG0000012175 | BMP5   | bone morphogenetic protein 5 [Source:HGNC<br>Symbol;Acc:HGNC:1072]                                                 |
| ENSG0000012304 | ACOT13 | acyl-CoA thioesterase 13 [Source:HGNC<br>Symbol;Acc:HGNC:20999]                                                    |
| ENSG0000012715 | VEGFA  | vascular endothelial growth factor A [Source:HGNC<br>Symbol;Acc:HGNC:12680]                                        |
| ENSG0000012761 | WISP3  | WNT1 inducible signaling pathway protein 3 [Source:HGNC<br>Symbol;Acc:HGNC:12771]                                  |
| ENSG0000013083 | LOX    | lysyl oxidase [Source:HGNC Symbol;Acc:HGNC:6664]                                                                   |
| ENSG0000013282 | CLINT1 | clathrin interactor 1 [Source:HGNC<br>Symbol;Acc:HGNC:23186]                                                       |
| ENSG0000013520 | IL4    | interleukin 4 [Source:HGNC Symbol;Acc:HGNC:6014]                                                                   |
| ENSG0000013578 | FGF1   | fibroblast growth factor 1 (acidic) [Source:HGNC<br>Symbol;Acc:HGNC:3665]                                          |
| ENSG0000013580 | NR3C1  | nuclear receptor subfamily 3, group C, member 1<br>(glucocorticoid receptor) [Source:HGNC<br>Symbol;Acc:HGNC:7978] |
| ENSG0000014013 | CD86   | CD86 molecule [Source:HGNC Symbol;Acc:HGNC:1705]                                                                   |
| ENSG0000014026 | OGG1   | 8-oxoguanine DNA glycosylase [Source:HGNC<br>Symbol;Acc:HGNC:8125]                                                 |
| ENSG0000014166 | KAT2B  | K(lysine) acetyltransferase 2B [Source:HGNC<br>Symbol;Acc:HGNC:8638]                                               |
| ENSG0000014315 | HES1   | hes family bHLH transcription factor 1 [Source:HGNC<br>Symbol;Acc:HGNC:5192]                                       |
| ENSG0000014867 | EIF4G1 | eukaryotic translation initiation factor 4 gamma, 1<br>[Source:HGNC Symbol;Acc:HGNC:3296]                          |
| ENSG0000015008 | IL1A   | interleukin 1, alpha [Source:HGNC Symbol;Acc:HGNC:5991]                                                            |
| ENSG0000015221 | ITGB6  | integrin, beta 6 [Source:HGNC Symbol;Acc:HGNC:6161]                                                                |
| ENSG0000015263 | GCG    | glucagon [Source:HGNC Symbol;Acc:HGNC:4191]                                                                        |
| ENSG0000015266 | APC2   | adenomatosis polyposis coli 2 [Source:HGNC                                                                         |



|                 |        |                                                                                                          |
|-----------------|--------|----------------------------------------------------------------------------------------------------------|
|                 |        | Symbol;Acc:HGNC:24036]                                                                                   |
| ENSG00000115414 | FN1    | fibronectin 1 [Source:HGNC Symbol;Acc:HGNC:3778]                                                         |
| ENSG00000115415 | STAT1  | signal transducer and activator of transcription 1, 91kDa<br>[Source:HGNC Symbol;Acc:HGNC:11362]         |
| ENSG00000115484 | CCT4   | chaperonin containing TCP1, subunit 4 (delta) [Source:HGNC<br>Symbol;Acc:HGNC:1617]                      |
| ENSG00000115825 | PRKD3  | protein kinase D3 [Source:HGNC Symbol;Acc:HGNC:9408]                                                     |
| ENSG00000115956 | PLEK   | pleckstrin [Source:HGNC Symbol;Acc:HGNC:9070]                                                            |
| ENSG00000116030 | SUMO1  | small ubiquitin-like modifier 1 [Source:HGNC<br>Symbol;Acc:HGNC:12502]                                   |
| ENSG00000116106 | EPHA4  | EPH receptor A4 [Source:HGNC Symbol;Acc:HGNC:3388]                                                       |
| ENSG00000116128 | BCL9   | B-cell CLL/lymphoma 9 [Source:HGNC<br>Symbol;Acc:HGNC:1008]                                              |
| ENSG00000116251 | RPL22  | ribosomal protein L22 [Source:HGNC<br>Symbol;Acc:HGNC:10315]                                             |
| ENSG00000116544 | DLGAP3 | discs, large (Drosophila) homolog-associated protein 3<br>[Source:HGNC Symbol;Acc:HGNC:30368]            |
| ENSG00000116791 | CRYZ   | crystallin, zeta (quinone reductase) [Source:HGNC<br>Symbol;Acc:HGNC:2419]                               |
| ENSG00000116981 | NT5C1A | 5'-nucleotidase, cytosolic IA [Source:HGNC<br>Symbol;Acc:HGNC:17819]                                     |
| ENSG00000117118 | SDHB   | succinate dehydrogenase complex, subunit B, iron sulfur (Ip)<br>[Source:HGNC Symbol;Acc:HGNC:10681]      |
| ENSG00000117525 | F3     | coagulation factor III (thromboplastin, tissue factor)<br>[Source:HGNC Symbol;Acc:HGNC:3541]             |
| ENSG00000117560 | FASLG  | Fas ligand (TNF superfamily, member 6) [Source:HGNC<br>Symbol;Acc:HGNC:11936]                            |
| ENSG00000117984 | CTSD   | cathepsin D [Source:HGNC Symbol;Acc:HGNC:2529]                                                           |
| ENSG00000118260 | CREB1  | cAMP responsive element binding protein 1 [Source:HGNC<br>Symbol;Acc:HGNC:2345]                          |
| ENSG00000118271 | TTR    | transthyretin [Source:HGNC Symbol;Acc:HGNC:12405]                                                        |
| ENSG00000118513 | MYB    | v-myb avian myeloblastosis viral oncogene homolog<br>[Source:HGNC Symbol;Acc:HGNC:7545]                  |
| ENSG00000118939 | UCHL3  | ubiquitin carboxyl-terminal esterase L3 (ubiquitin thiolesterase)<br>[Source:HGNC Symbol;Acc:HGNC:12515] |
| ENSG00000118972 | FGF23  | fibroblast growth factor 23 [Source:HGNC<br>Symbol;Acc:HGNC:3680]                                        |
| ENSG00000119042 | SATB2  | SATB homeobox 2 [Source:HGNC Symbol;Acc:HGNC:21637]                                                      |
| ENSG00000119138 | KLF9   | Kruppel-like factor 9 [Source:HGNC<br>Symbol;Acc:HGNC:1123]                                              |
| ENSG00000119953 | SMNDC1 | survival motor neuron domain containing 1 [Source:HGNC<br>Symbol;Acc:HGNC:16900]                         |
| ENSG00000120057 | SFRP5  | secreted frizzled-related protein 5 [Source:HGNC<br>Symbol;Acc:HGNC:10779]                               |

|                 |         |                                                                                                     |
|-----------------|---------|-----------------------------------------------------------------------------------------------------|
| ENSG00000120659 | TNFSF11 | tumor necrosis factor (ligand) superfamily, member 11<br>[Source:HGNC Symbol;Acc:HGNC:11926]        |
| ENSG00000120708 | TGFBI   | transforming growth factor, beta-induced, 68kDa<br>[Source:HGNC Symbol;Acc:HGNC:11771]              |
| ENSG00000120738 | EGR1    | early growth response 1 [Source:HGNC<br>Symbol;Acc:HGNC:3238]                                       |
| ENSG00000120798 | NR2C1   | nuclear receptor subfamily 2, group C, member 1<br>[Source:HGNC Symbol;Acc:HGNC:7971]               |
| ENSG00000120915 | EPHX2   | epoxide hydrolase 2, cytoplasmic [Source:HGNC<br>Symbol;Acc:HGNC:3402]                              |
| ENSG00000121211 | MND1    | meiotic nuclear divisions 1 homolog ( <i>S. cerevisiae</i> )<br>[Source:HGNC Symbol;Acc:HGNC:24839] |
| ENSG00000121594 | CD80    | CD80 molecule [Source:HGNC Symbol;Acc:HGNC:1700]                                                    |
| ENSG00000121691 | CAT     | catalase [Source:HGNC Symbol;Acc:HGNC:1516]                                                         |
| ENSG00000121966 | CXCR4   | chemokine (C-X-C motif) receptor 4 [Source:HGNC<br>Symbol;Acc:HGNC:2561]                            |
| ENSG00000122194 | PLG     | plasminogen [Source:HGNC Symbol;Acc:HGNC:9071]                                                      |
| ENSG00000122861 | PLAU    | plasminogen activator, urokinase [Source:HGNC<br>Symbol;Acc:HGNC:9052]                              |
| ENSG00000122877 | EGR2    | early growth response 2 [Source:HGNC<br>Symbol;Acc:HGNC:3239]                                       |
| ENSG00000123342 | MMP19   | matrix metalloproteinase 19 [Source:HGNC<br>Symbol;Acc:HGNC:7165]                                   |
| ENSG00000123908 | AGO2    | argonaute RISC catalytic component 2 [Source:HGNC<br>Symbol;Acc:HGNC:3263]                          |
| ENSG00000123999 | INHA    | inhibin, alpha [Source:HGNC Symbol;Acc:HGNC:6065]                                                   |
| ENSG00000124721 | DNAH8   | dynein, axonemal, heavy chain 8 [Source:HGNC<br>Symbol;Acc:HGNC:2952]                               |
| ENSG00000124813 | RUNX2   | runt-related transcription factor 2 [Source:HGNC<br>Symbol;Acc:HGNC:10472]                          |
| ENSG00000125378 | BMP4    | bone morphogenetic protein 4 [Source:HGNC<br>Symbol;Acc:HGNC:1071]                                  |
| ENSG00000125492 | BARHL1  | BarH-like homeobox 1 [Source:HGNC<br>Symbol;Acc:HGNC:953]                                           |
| ENSG00000125538 | IL1B    | interleukin 1, beta [Source:HGNC Symbol;Acc:HGNC:5992]                                              |
| ENSG00000125618 | PAX8    | paired box 8 [Source:HGNC Symbol;Acc:HGNC:8622]                                                     |
| ENSG00000125845 | BMP2    | bone morphogenetic protein 2 [Source:HGNC<br>Symbol;Acc:HGNC:1069]                                  |
| ENSG00000125952 | MAX     | MYC associated factor X [Source:HGNC<br>Symbol;Acc:HGNC:6913]                                       |
| ENSG00000126261 | UBA2    | ubiquitin-like modifier activating enzyme 2 [Source:HGNC<br>Symbol;Acc:HGNC:30661]                  |
| ENSG00000126561 | STAT5A  | signal transducer and activator of transcription 5A<br>[Source:HGNC Symbol;Acc:HGNC:11366]          |

|                 |          |                                                                                                                                               |
|-----------------|----------|-----------------------------------------------------------------------------------------------------------------------------------------------|
| ENSG00000127445 | PIN1     | peptidylprolyl cis/trans isomerase, NIMA-interacting 1<br>[Source:HGNC Symbol;Acc:HGNC:8988]                                                  |
| ENSG00000127554 | GFER     | growth factor, augments of liver regeneration [Source:HGNC<br>Symbol;Acc:HGNC:4236]                                                           |
| ENSG00000128050 | PAICS    | phosphoribosylaminoimidazole carboxylase,<br>phosphoribosylaminoimidazole succinocarboxamide synthetase<br>[Source:HGNC Symbol;Acc:HGNC:8587] |
| ENSG00000128052 | KDR      | kinase insert domain receptor (a type III receptor tyrosine<br>kinase) [Source:HGNC Symbol;Acc:HGNC:6307]                                     |
| ENSG00000128268 | MGAT3    | mannosyl (beta-1,4-)-glycoprotein<br>beta-1,4-N-acetylglucosaminyltransferase [Source:HGNC<br>Symbol;Acc:HGNC:7046]                           |
| ENSG00000128272 | ATF4     | activating transcription factor 4 [Source:HGNC<br>Symbol;Acc:HGNC:786]                                                                        |
| ENSG00000128602 | SMO      | smoothed, frizzled class receptor [Source:HGNC<br>Symbol;Acc:HGNC:11119]                                                                      |
| ENSG00000129226 | CD68     | CD68 molecule [Source:HGNC Symbol;Acc:HGNC:1693]                                                                                              |
| ENSG00000129460 | NGDN     | neuroguidin, EIF4E binding protein [Source:HGNC<br>Symbol;Acc:HGNC:20271]                                                                     |
| ENSG00000129965 | INS-IGF2 | INS-IGF2 readthrough [Source:HGNC<br>Symbol;Acc:HGNC:33527]                                                                                   |
| ENSG00000129991 | TNNI3    | troponin I type 3 (cardiac) [Source:HGNC<br>Symbol;Acc:HGNC:11947]                                                                            |
| ENSG00000130164 | LDLR     | low density lipoprotein receptor [Source:HGNC<br>Symbol;Acc:HGNC:6547]                                                                        |
| ENSG00000130203 | APOE     | apolipoprotein E [Source:HGNC Symbol;Acc:HGNC:613]                                                                                            |
| ENSG00000130368 | MAS1     | MAS1 proto-oncogene, G protein-coupled receptor<br>[Source:HGNC Symbol;Acc:HGNC:6899]                                                         |
| ENSG00000130675 | MNX1     | motor neuron and pancreas homeobox 1 [Source:HGNC<br>Symbol;Acc:HGNC:4979]                                                                    |
| ENSG00000131910 | NR0B2    | nuclear receptor subfamily 0, group B, member 2<br>[Source:HGNC Symbol;Acc:HGNC:7961]                                                         |
| ENSG00000132170 | PPARG    | peroxisome proliferator-activated receptor gamma<br>[Source:HGNC Symbol;Acc:HGNC:9236]                                                        |
| ENSG00000132341 | RAN      | RAN, member RAS oncogene family [Source:HGNC<br>Symbol;Acc:HGNC:9846]                                                                         |
| ENSG00000132688 | NES      | nestin [Source:HGNC Symbol;Acc:HGNC:7756]                                                                                                     |
| ENSG00000132693 | CRP      | C-reactive protein, pentraxin-related [Source:HGNC<br>Symbol;Acc:HGNC:2367]                                                                   |
| ENSG00000134001 | EIF2S1   | eukaryotic translation initiation factor 2, subunit 1 alpha, 35kDa<br>[Source:HGNC Symbol;Acc:HGNC:3265]                                      |
| ENSG00000134184 | GSTM1    | glutathione S-transferase mu 1 [Source:HGNC<br>Symbol;Acc:HGNC:4632]                                                                          |
| ENSG00000134259 | NGF      | nerve growth factor (beta polypeptide) [Source:HGNC                                                                                           |

|                 |          |                                                                                                                            |
|-----------------|----------|----------------------------------------------------------------------------------------------------------------------------|
|                 |          | Symbol;Acc:HGNC:7808]                                                                                                      |
| ENSG00000134308 | YWHAQ    | tyrosine 3-monooxygenase/tryptophan 5-monooxygenase activation protein, theta [Source:HGNC Symbol;Acc:HGNC:12854]          |
| ENSG00000134363 | FST      | follistatin [Source:HGNC Symbol;Acc:HGNC:3971]                                                                             |
| ENSG00000134460 | IL2RA    | interleukin 2 receptor, alpha [Source:HGNC Symbol;Acc:HGNC:6008]                                                           |
| ENSG00000134716 | CYP2J2   | cytochrome P450, family 2, subfamily J, polypeptide 2 [Source:HGNC Symbol;Acc:HGNC:2634]                                   |
| ENSG00000134853 | PDGFRA   | platelet-derived growth factor receptor, alpha polypeptide [Source:HGNC Symbol;Acc:HGNC:8803]                              |
| ENSG00000134909 | ARHGAP32 | Rho GTPase activating protein 32 [Source:HGNC Symbol;Acc:HGNC:17399]                                                       |
| ENSG00000134982 | APC      | adenomatous polyposis coli [Source:HGNC Symbol;Acc:HGNC:583]                                                               |
| ENSG00000135218 | CD36     | CD36 molecule (thrombospondin receptor) [Source:HGNC Symbol;Acc:HGNC:1663]                                                 |
| ENSG00000135624 | CCT7     | chaperonin containing TCP1, subunit 7 (eta) [Source:HGNC Symbol;Acc:HGNC:1622]                                             |
| ENSG00000135821 | GLUL     | glutamate-ammonia ligase [Source:HGNC Symbol;Acc:HGNC:4341]                                                                |
| ENSG00000135999 | EPC2     | enhancer of polycomb homolog 2 (Drosophila) [Source:HGNC Symbol;Acc:HGNC:24543]                                            |
| ENSG00000136146 | MED4     | mediator complex subunit 4 [Source:HGNC Symbol;Acc:HGNC:17903]                                                             |
| ENSG00000136238 | RAC1     | ras-related C3 botulinum toxin substrate 1 (rho family, small GTP binding protein Rac1) [Source:HGNC Symbol;Acc:HGNC:9801] |
| ENSG00000136450 | SRSF1    | serine/arginine-rich splicing factor 1 [Source:HGNC Symbol;Acc:HGNC:10780]                                                 |
| ENSG00000136531 | SCN2A    | sodium channel, voltage-gated, type II, alpha subunit [Source:HGNC Symbol;Acc:HGNC:10588]                                  |
| ENSG00000136574 | GATA4    | GATA binding protein 4 [Source:HGNC Symbol;Acc:HGNC:4173]                                                                  |
| ENSG00000136634 | IL10     | interleukin 10 [Source:HGNC Symbol;Acc:HGNC:5962]                                                                          |
| ENSG00000136869 | TLR4     | toll-like receptor 4 [Source:HGNC Symbol;Acc:HGNC:11850]                                                                   |
| ENSG00000136929 | HEMGN    | hemogen [Source:HGNC Symbol;Acc:HGNC:17509]                                                                                |
| ENSG00000136930 | PSMB7    | proteasome (prosome, macropain) subunit, beta type, 7 [Source:HGNC Symbol;Acc:HGNC:9544]                                   |
| ENSG00000136931 | NR5A1    | nuclear receptor subfamily 5, group A, member 1 [Source:HGNC Symbol;Acc:HGNC:7983]                                         |
| ENSG00000136997 | MYC      | v-myc avian myelocytomatosis viral oncogene homolog [Source:HGNC Symbol;Acc:HGNC:7553]                                     |
| ENSG00000137076 | TLN1     | talin 1 [Source:HGNC Symbol;Acc:HGNC:11845]                                                                                |

|                 |         |                                                                                                                           |
|-----------------|---------|---------------------------------------------------------------------------------------------------------------------------|
| ENSG00000137154 | RPS6    | ribosomal protein S6 [Source:HGNC<br>Symbol;Acc:HGNC:10429]                                                               |
| ENSG00000137267 | TUBB2A  | tubulin, beta 2A class IIa [Source:HGNC<br>Symbol;Acc:HGNC:12412]                                                         |
| ENSG00000137312 | FLOT1   | flotillin 1 [Source:HGNC Symbol;Acc:HGNC:3757]                                                                            |
| ENSG00000137413 | TAF8    | TAF8 RNA polymerase II, TATA box binding protein<br>(TBP)-associated factor, 43kDa [Source:HGNC<br>Symbol;Acc:HGNC:17300] |
| ENSG00000137710 | RDX     | radixin [Source:HGNC Symbol;Acc:HGNC:9944]                                                                                |
| ENSG00000137752 | CASP1   | caspase 1, apoptosis-related cysteine peptidase [Source:HGNC<br>Symbol;Acc:HGNC:1499]                                     |
| ENSG00000137801 | THBS1   | thrombospondin 1 [Source:HGNC Symbol;Acc:HGNC:11785]                                                                      |
| ENSG00000137868 | STRA6   | stimulated by retinoic acid 6 [Source:HGNC<br>Symbol;Acc:HGNC:30650]                                                      |
| ENSG00000137955 | RABGGTB | Rab geranylgeranyltransferase, beta subunit [Source:HGNC<br>Symbol;Acc:HGNC:9796]                                         |
| ENSG00000138039 | LHCGR   | luteinizing hormone/choriogonadotropin receptor<br>[Source:HGNC Symbol;Acc:HGNC:6585]                                     |
| ENSG00000138435 | CHRNA1  | cholinergic receptor, nicotinic, alpha 1 (muscle) [Source:HGNC<br>Symbol;Acc:HGNC:1955]                                   |
| ENSG00000138685 | FGF2    | fibroblast growth factor 2 (basic) [Source:HGNC<br>Symbol;Acc:HGNC:3676]                                                  |
| ENSG00000138760 | SCARB2  | scavenger receptor class B, member 2 [Source:HGNC<br>Symbol;Acc:HGNC:1665]                                                |
| ENSG00000139318 | DUSP6   | dual specificity phosphatase 6 [Source:HGNC<br>Symbol;Acc:HGNC:3072]                                                      |
| ENSG00000139668 | WDFY2   | WD repeat and FYVE domain containing 2 [Source:HGNC<br>Symbol;Acc:HGNC:20482]                                             |
| ENSG00000139687 | RB1     | retinoblastoma 1 [Source:HGNC Symbol;Acc:HGNC:9884]                                                                       |
| ENSG00000140254 | DUOXA1  | dual oxidase maturation factor 1 [Source:HGNC<br>Symbol;Acc:HGNC:26507]                                                   |
| ENSG00000140285 | FGF7    | fibroblast growth factor 7 [Source:HGNC<br>Symbol;Acc:HGNC:3685]                                                          |
| ENSG00000140396 | NCOA2   | nuclear receptor coactivator 2 [Source:HGNC<br>Symbol;Acc:HGNC:7669]                                                      |
| ENSG00000140443 | IGF1R   | insulin-like growth factor 1 receptor [Source:HGNC<br>Symbol;Acc:HGNC:5465]                                               |
| ENSG00000140465 | CYP1A1  | cytochrome P450, family 1, subfamily A, polypeptide 1<br>[Source:HGNC Symbol;Acc:HGNC:2595]                               |
| ENSG00000140968 | IRF8    | interferon regulatory factor 8 [Source:HGNC<br>Symbol;Acc:HGNC:5358]                                                      |
| ENSG00000141646 | SMAD4   | SMAD family member 4 [Source:HGNC<br>Symbol;Acc:HGNC:6770]                                                                |
| ENSG00000141968 | VAV1    | vav 1 guanine nucleotide exchange factor [Source:HGNC                                                                     |

|                 |        |                                                                                                        |
|-----------------|--------|--------------------------------------------------------------------------------------------------------|
| ENSG00000142168 | SOD1   | Symbol;Acc:HGNC:12657]<br>superoxide dismutase 1, soluble [Source:HGNC<br>Symbol;Acc:HGNC:11179]       |
| ENSG00000142192 | APP    | amyloid beta (A4) precursor protein [Source:HGNC<br>Symbol;Acc:HGNC:620]                               |
| ENSG00000142208 | AKT1   | v-akt murine thymoma viral oncogene homolog 1<br>[Source:HGNC Symbol;Acc:HGNC:391]                     |
| ENSG00000142507 | PSMB6  | proteasome (prosome, macropain) subunit, beta type, 6<br>[Source:HGNC Symbol;Acc:HGNC:9543]            |
| ENSG00000142515 | KLK3   | kallikrein-related peptidase 3 [Source:HGNC<br>Symbol;Acc:HGNC:6364]                                   |
| ENSG00000142731 | PLK4   | polo-like kinase 4 [Source:HGNC Symbol;Acc:HGNC:11397]                                                 |
| ENSG00000143799 | PARP1  | poly (ADP-ribose) polymerase 1 [Source:HGNC<br>Symbol;Acc:HGNC:270]                                    |
| ENSG00000143933 | CALM2  | calmodulin 2 (phosphorylase kinase, delta) [Source:HGNC<br>Symbol;Acc:HGNC:1445]                       |
| ENSG00000143947 | RPS27A | ribosomal protein S27a [Source:HGNC<br>Symbol;Acc:HGNC:10417]                                          |
| ENSG00000144891 | AGTR1  | angiotensin II receptor, type 1 [Source:HGNC<br>Symbol;Acc:HGNC:336]                                   |
| ENSG00000145335 | SNCA   | synuclein, alpha (non A4 component of amyloid precursor)<br>[Source:HGNC Symbol;Acc:HGNC:11138]        |
| ENSG00000145839 | IL9    | interleukin 9 [Source:HGNC Symbol;Acc:HGNC:6029]                                                       |
| ENSG00000145907 | G3BP1  | GTPase activating protein (SH3 domain) binding protein 1<br>[Source:HGNC Symbol;Acc:HGNC:30292]        |
| ENSG00000146085 | MUT    | methylmalonyl CoA mutase [Source:HGNC<br>Symbol;Acc:HGNC:7526]                                         |
| ENSG00000146674 | IGFBP3 | insulin-like growth factor binding protein 3 [Source:HGNC<br>Symbol;Acc:HGNC:5472]                     |
| ENSG00000146678 | IGFBP1 | insulin-like growth factor binding protein 1 [Source:HGNC<br>Symbol;Acc:HGNC:5469]                     |
| ENSG00000147162 | OGT    | O-linked N-acetylglucosamine (GlcNAc) transferase<br>[Source:HGNC Symbol;Acc:HGNC:8127]                |
| ENSG00000147316 | MCPH1  | microcephalin 1 [Source:HGNC Symbol;Acc:HGNC:6954]                                                     |
| ENSG00000147437 | GNRH1  | gonadotropin-releasing hormone 1 (luteinizing-releasing<br>hormone) [Source:HGNC Symbol;Acc:HGNC:4419] |
| ENSG00000147869 | CER1   | cerberus 1, DAN family BMP antagonist [Source:HGNC<br>Symbol;Acc:HGNC:1862]                            |
| ENSG00000147883 | CDKN2B | cyclin-dependent kinase inhibitor 2B (p15, inhibits CDK4)<br>[Source:HGNC Symbol;Acc:HGNC:1788]        |
| ENSG00000148082 | SHC3   | SHC (Src homology 2 domain containing) transforming protein<br>3 [Source:HGNC Symbol;Acc:HGNC:18181]   |
| ENSG00000148400 | NOTCH1 | notch 1 [Source:HGNC Symbol;Acc:HGNC:7881]                                                             |
| ENSG00000148773 | MKI67  | marker of proliferation Ki-67 [Source:HGNC                                                             |

|                 |           |                                                                                                                      |
|-----------------|-----------|----------------------------------------------------------------------------------------------------------------------|
|                 |           | Symbol;Acc:HGNC:7107]                                                                                                |
| ENSG00000148835 | TAF5      | TAF5 RNA polymerase II, TATA box binding protein (TBP)-associated factor, 100kDa [Source:HGNC Symbol;Acc:HGNC:11539] |
| ENSG00000149972 | CNTN5     | contactin 5 [Source:HGNC Symbol;Acc:HGNC:2175]                                                                       |
| ENSG00000150782 | IL18      | interleukin 18 [Source:HGNC Symbol;Acc:HGNC:5986]                                                                    |
| ENSG00000152256 | PK1       | pyruvate dehydrogenase kinase, isozyme 1 [Source:HGNC Symbol;Acc:HGNC:8809]                                          |
| ENSG00000152661 | GJA1      | gap junction protein, alpha 1, 43kDa [Source:HGNC Symbol;Acc:HGNC:4274]                                              |
| ENSG00000152785 | BMP3      | bone morphogenetic protein 3 [Source:HGNC Symbol;Acc:HGNC:1070]                                                      |
| ENSG00000154342 | WNT3A     | wingless-type MMTV integration site family, member 3A [Source:HGNC Symbol;Acc:HGNC:15983]                            |
| ENSG00000155011 | DKK2      | dickkopf WNT signaling pathway inhibitor 2 [Source:HGNC Symbol;Acc:HGNC:2892]                                        |
| ENSG00000155090 | KLF10     | Kruppel-like factor 10 [Source:HGNC Symbol;Acc:HGNC:11810]                                                           |
| ENSG00000155093 | PTPRN2    | protein tyrosine phosphatase, receptor type, N polypeptide 2 [Source:HGNC Symbol;Acc:HGNC:9677]                      |
| ENSG00000156313 | RPGR      | retinitis pigmentosa GTPase regulator [Source:HGNC Symbol;Acc:HGNC:10295]                                            |
| ENSG00000156508 | EEF1A1    | eukaryotic translation elongation factor 1 alpha 1 [Source:HGNC Symbol;Acc:HGNC:3189]                                |
| ENSG00000156709 | AIFM1     | apoptosis-inducing factor, mitochondrion-associated, 1 [Source:HGNC Symbol;Acc:HGNC:8768]                            |
| ENSG00000157193 | LRP8      | low density lipoprotein receptor-related protein 8, apolipoprotein e receptor [Source:HGNC Symbol;Acc:HGNC:6700]     |
| ENSG00000157933 | SKI       | SKI proto-oncogene [Source:HGNC Symbol;Acc:HGNC:10896]                                                               |
| ENSG00000158373 | HIST1H2BD | histone cluster 1, H2bd [Source:HGNC Symbol;Acc:HGNC:4747]                                                           |
| ENSG00000158402 | CDC25C    | cell division cycle 25C [Source:HGNC Symbol;Acc:HGNC:1727]                                                           |
| ENSG00000158874 | APOA2     | apolipoprotein A-II [Source:HGNC Symbol;Acc:HGNC:601]                                                                |
| ENSG00000158941 | CCAR2     | cell cycle and apoptosis regulator 2 [Source:HGNC Symbol;Acc:HGNC:23360]                                             |
| ENSG00000159352 | PSMD4     | proteasome (prosome, macropain) 26S subunit, non-ATPase, 4 [Source:HGNC Symbol;Acc:HGNC:9561]                        |
| ENSG00000159640 | ACE       | angiotensin I converting enzyme [Source:HGNC Symbol;Acc:HGNC:2707]                                                   |
| ENSG00000160014 | CALM3     | calmodulin 3 (phosphorylase kinase, delta) [Source:HGNC Symbol;Acc:HGNC:1449]                                        |

|                 |        |                                                                                                       |
|-----------------|--------|-------------------------------------------------------------------------------------------------------|
| ENSG00000160211 | G6PD   | glucose-6-phosphate dehydrogenase [Source:HGNC Symbol;Acc:HGNC:4057]                                  |
| ENSG00000160255 | ITGB2  | integrin, beta 2 (complement component 3 receptor 3 and 4 subunit) [Source:HGNC Symbol;Acc:HGNC:6155] |
| ENSG00000160867 | FGFR4  | fibroblast growth factor receptor 4 [Source:HGNC Symbol;Acc:HGNC:3691]                                |
| ENSG00000160868 | CYP3A4 | cytochrome P450, family 3, subfamily A, polypeptide 4 [Source:HGNC Symbol;Acc:HGNC:2637]              |
| ENSG00000162551 | ALPL   | alkaline phosphatase, liver/bone/kidney [Source:HGNC Symbol;Acc:HGNC:438]                             |
| ENSG00000162692 | VCAM1  | vascular cell adhesion molecule 1 [Source:HGNC Symbol;Acc:HGNC:12663]                                 |
| ENSG00000162738 | VANGL2 | VANGL planar cell polarity protein 2 [Source:HGNC Symbol;Acc:HGNC:15511]                              |
| ENSG00000162924 | REL    | v-rel avian reticuloendotheliosis viral oncogene homolog [Source:HGNC Symbol;Acc:HGNC:9954]           |
| ENSG00000163041 | H3F3A  | H3 histone, family 3A [Source:HGNC Symbol;Acc:HGNC:4764]                                              |
| ENSG00000163131 | CTSS   | cathepsin S [Source:HGNC Symbol;Acc:HGNC:2545]                                                        |
| ENSG00000163217 | BMP10  | bone morphogenetic protein 10 [Source:HGNC Symbol;Acc:HGNC:20869]                                     |
| ENSG00000163235 | TGFA   | transforming growth factor, alpha [Source:HGNC Symbol;Acc:HGNC:11765]                                 |
| ENSG00000163273 | NPPC   | natriuretic peptide C [Source:HGNC Symbol;Acc:HGNC:7941]                                              |
| ENSG00000163283 | ALPP   | alkaline phosphatase, placental [Source:HGNC Symbol;Acc:HGNC:439]                                     |
| ENSG00000163286 | ALPPL2 | alkaline phosphatase, placental-like 2 [Source:HGNC Symbol;Acc:HGNC:441]                              |
| ENSG00000163631 | ALB    | albumin [Source:HGNC Symbol;Acc:HGNC:399]                                                             |
| ENSG00000163666 | HESX1  | HESX homeobox 1 [Source:HGNC Symbol;Acc:HGNC:4877]                                                    |
| ENSG00000163737 | PF4    | platelet factor 4 [Source:HGNC Symbol;Acc:HGNC:8861]                                                  |
| ENSG00000163781 | TOPBP1 | topoisomerase (DNA) II binding protein 1 [Source:HGNC Symbol;Acc:HGNC:17008]                          |
| ENSG00000163794 | UCN    | urocortin [Source:HGNC Symbol;Acc:HGNC:12516]                                                         |
| ENSG00000163810 | TGM4   | transglutaminase 4 [Source:HGNC Symbol;Acc:HGNC:11780]                                                |
| ENSG00000164032 | H2AFZ  | H2A histone family, member Z [Source:HGNC Symbol;Acc:HGNC:4741]                                       |
| ENSG00000164305 | CASP3  | caspase 3, apoptosis-related cysteine peptidase [Source:HGNC Symbol;Acc:HGNC:1504]                    |
| ENSG00000164326 | CARTPT | CART prepropeptide [Source:HGNC Symbol;Acc:HGNC:24323]                                                |
| ENSG00000164399 | IL3    | interleukin 3 [Source:HGNC Symbol;Acc:HGNC:6011]                                                      |
| ENSG00000164400 | CSF2   | colony stimulating factor 2 (granulocyte-macrophage) [Source:HGNC Symbol;Acc:HGNC:2434]               |



|                 |          |                                                                                           |
|-----------------|----------|-------------------------------------------------------------------------------------------|
| ENSG00000164532 | TBX20    | T-box 20 [Source:HGNC Symbol;Acc:HGNC:11598]                                              |
| ENSG00000164611 | PTTG1    | pituitary tumor-transforming 1 [Source:HGNC Symbol;Acc:HGNC:9690]                         |
| ENSG00000164651 | SP8      | Sp8 transcription factor [Source:HGNC Symbol;Acc:HGNC:19196]                              |
| ENSG00000164692 | COL1A2   | collagen, type I, alpha 2 [Source:HGNC Symbol;Acc:HGNC:2198]                              |
| ENSG00000164733 | CTSB     | cathepsin B [Source:HGNC Symbol;Acc:HGNC:2527]                                            |
| ENSG00000164867 | NOS3     | nitric oxide synthase 3 (endothelial cell) [Source:HGNC Symbol;Acc:HGNC:7876]             |
| ENSG00000164902 | PHAX     | phosphorylated adaptor for RNA export [Source:HGNC Symbol;Acc:HGNC:10241]                 |
| ENSG00000165025 | SYK      | spleen tyrosine kinase [Source:HGNC Symbol;Acc:HGNC:11491]                                |
| ENSG00000165097 | KDM1B    | lysine (K)-specific demethylase 1B [Source:HGNC Symbol;Acc:HGNC:21577]                    |
| ENSG00000165304 | MELK     | maternal embryonic leucine zipper kinase [Source:HGNC Symbol;Acc:HGNC:16870]              |
| ENSG00000165392 | WRN      | Werner syndrome, RecQ helicase-like [Source:HGNC Symbol;Acc:HGNC:12791]                   |
| ENSG00000165841 | CYP2C19  | cytochrome P450, family 2, subfamily C, polypeptide 19 [Source:HGNC Symbol;Acc:HGNC:2621] |
| ENSG00000165983 | PTER     | phosphotriesterase related [Source:HGNC Symbol;Acc:HGNC:9590]                             |
| ENSG00000166508 | MCM7     | minichromosome maintenance complex component 7 [Source:HGNC Symbol;Acc:HGNC:6950]         |
| ENSG00000166509 | CLEC3A   | C-type lectin domain family 3, member A [Source:HGNC Symbol;Acc:HGNC:2052]                |
| ENSG00000166670 | MMP10    | matrix metalloproteinase 10 (stromelysin 2) [Source:HGNC Symbol;Acc:HGNC:7156]            |
| ENSG00000166803 | KIAA0101 | KIAA0101 [Source:HGNC Symbol;Acc:HGNC:28961]                                              |
| ENSG00000166949 | SMAD3    | SMAD family member 3 [Source:HGNC Symbol;Acc:HGNC:6769]                                   |
| ENSG00000167088 | SNRPD1   | small nuclear ribonucleoprotein D1 polypeptide 16kDa [Source:HGNC Symbol;Acc:HGNC:11158]  |
| ENSG00000167468 | GPX4     | glutathione peroxidase 4 [Source:HGNC Symbol;Acc:HGNC:4556]                               |
| ENSG00000167548 | KMT2D    | lysine (K)-specific methyltransferase 2D [Source:HGNC Symbol;Acc:HGNC:7133]               |
| ENSG00000167658 | EEF2     | eukaryotic translation elongation factor 2 [Source:HGNC Symbol;Acc:HGNC:3214]             |
| ENSG00000168002 | POLR2G   | polymerase (RNA) II (DNA directed) polypeptide G [Source:HGNC Symbol;Acc:HGNC:9194]       |
| ENSG00000168214 | RBPJ     | recombination signal binding protein for immunoglobulin                                   |

|                 |         |                                                                                                                                   |
|-----------------|---------|-----------------------------------------------------------------------------------------------------------------------------------|
| ENSG00000168283 | BMI1    | kappa J region [Source:HGNC Symbol;Acc:HGNC:5724]<br>BMI1 proto-oncogene, polycomb ring finger [Source:HGNC Symbol;Acc:HGNC:1066] |
| ENSG00000168505 | GBX2    | gastrulation brain homeobox 2 [Source:HGNC Symbol;Acc:HGNC:4186]                                                                  |
| ENSG00000168610 | STAT3   | signal transducer and activator of transcription 3 (acute-phase response factor) [Source:HGNC Symbol;Acc:HGNC:11364]              |
| ENSG00000169083 | AR      | androgen receptor [Source:HGNC Symbol;Acc:HGNC:644]                                                                               |
| ENSG00000169118 | CSNK1G1 | casein kinase 1, gamma 1 [Source:HGNC Symbol;Acc:HGNC:2454]                                                                       |
| ENSG00000169218 | RSPO1   | R-spondin 1 [Source:HGNC Symbol;Acc:HGNC:21679]                                                                                   |
| ENSG00000169429 | CXCL8   | chemokine (C-X-C motif) ligand 8 [Source:HGNC Symbol;Acc:HGNC:6025]                                                               |
| ENSG00000169679 | BUB1    | BUB1 mitotic checkpoint serine/threonine kinase [Source:HGNC Symbol;Acc:HGNC:1148]                                                |
| ENSG00000169710 | FASN    | fatty acid synthase [Source:HGNC Symbol;Acc:HGNC:3594]                                                                            |
| ENSG00000169750 | RAC3    | ras-related C3 botulinum toxin substrate 3 (rho family, small GTP binding protein Rac3) [Source:HGNC Symbol;Acc:HGNC:9803]        |
| ENSG00000170017 | ALCAM   | activated leukocyte cell adhesion molecule [Source:HGNC Symbol;Acc:HGNC:400]                                                      |
| ENSG00000170262 | MRAP    | melanocortin 2 receptor accessory protein [Source:HGNC Symbol;Acc:HGNC:1304]                                                      |
| ENSG00000170315 | UBB     | ubiquitin B [Source:HGNC Symbol;Acc:HGNC:12463]                                                                                   |
| ENSG00000170345 | FOS     | FBJ murine osteosarcoma viral oncogene homolog [Source:HGNC Symbol;Acc:HGNC:3796]                                                 |
| ENSG00000170421 | KRT8    | keratin 8 [Source:HGNC Symbol;Acc:HGNC:6446]                                                                                      |
| ENSG00000170430 | MGMT    | O-6-methylguanine-DNA methyltransferase [Source:HGNC Symbol;Acc:HGNC:7059]                                                        |
| ENSG00000170899 | GSTA4   | glutathione S-transferase alpha 4 [Source:HGNC Symbol;Acc:HGNC:4629]                                                              |
| ENSG00000171105 | INSR    | insulin receptor [Source:HGNC Symbol;Acc:HGNC:6091]                                                                               |
| ENSG00000171243 | SOSTDC1 | sclerostin domain containing 1 [Source:HGNC Symbol;Acc:HGNC:21748]                                                                |
| ENSG00000171431 | KRT20   | keratin 20 [Source:HGNC Symbol;Acc:HGNC:20412]                                                                                    |
| ENSG00000171552 | BCL2L1  | BCL2-like 1 [Source:HGNC Symbol;Acc:HGNC:992]                                                                                     |
| ENSG00000171747 | LGALS4  | lectin, galactoside-binding, soluble, 4 [Source:HGNC Symbol;Acc:HGNC:6565]                                                        |
| ENSG00000171791 | BCL2    | B-cell CLL/lymphoma 2 [Source:HGNC Symbol;Acc:HGNC:990]                                                                           |
| ENSG00000171855 | IFNB1   | interferon, beta 1, fibroblast [Source:HGNC Symbol;Acc:HGNC:5434]                                                                 |
| ENSG00000172115 | CYCS    | cytochrome c, somatic [Source:HGNC Symbol;Acc:HGNC:19986]                                                                         |

|                 |         |                                                                                                       |
|-----------------|---------|-------------------------------------------------------------------------------------------------------|
| ENSG00000172179 | PRL     | prolactin [Source:HGNC Symbol;Acc:HGNC:9445]                                                          |
| ENSG00000172845 | SP3     | Sp3 transcription factor [Source:HGNC Symbol;Acc:HGNC:11208]                                          |
| ENSG00000173039 | RELA    | v-rel avian reticuloendotheliosis viral oncogene homolog A [Source:HGNC Symbol;Acc:HGNC:9955]         |
| ENSG00000173273 | TNKS    | tankyrase, TRF1-interacting ankyrin-related ADP-ribose polymerase [Source:HGNC Symbol;Acc:HGNC:11941] |
| ENSG00000173673 | HES3    | hes family bHLH transcription factor 3 [Source:HGNC Symbol;Acc:HGNC:26226]                            |
| ENSG00000173757 | STAT5B  | signal transducer and activator of transcription 5B [Source:HGNC Symbol;Acc:HGNC:11367]               |
| ENSG00000174156 | GSTA3   | glutathione S-transferase alpha 3 [Source:HGNC Symbol;Acc:HGNC:4628]                                  |
| ENSG00000174175 | SELP    | selectin P (granule membrane protein 140kDa, antigen CD62) [Source:HGNC Symbol;Acc:HGNC:10721]        |
| ENSG00000174697 | LEP     | leptin [Source:HGNC Symbol;Acc:HGNC:6553]                                                             |
| ENSG00000175084 | DES     | desmin [Source:HGNC Symbol;Acc:HGNC:2770]                                                             |
| ENSG00000175387 | SMAD2   | SMAD family member 2 [Source:HGNC Symbol;Acc:HGNC:6768]                                               |
| ENSG00000175445 | LPL     | lipoprotein lipase [Source:HGNC Symbol;Acc:HGNC:6677]                                                 |
| ENSG00000176165 | FOXG1   | forkhead box G1 [Source:HGNC Symbol;Acc:HGNC:3811]                                                    |
| ENSG00000176387 | HSD11B2 | hydroxysteroid (11-beta) dehydrogenase 2 [Source:HGNC Symbol;Acc:HGNC:5209]                           |
| ENSG00000177283 | FZD8    | frizzled class receptor 8 [Source:HGNC Symbol;Acc:HGNC:4046]                                          |
| ENSG00000177302 | TOP3A   | topoisomerase (DNA) III alpha [Source:HGNC Symbol;Acc:HGNC:11992]                                     |
| ENSG00000177455 | CD19    | CD19 molecule [Source:HGNC Symbol;Acc:HGNC:1633]                                                      |
| ENSG00000177606 | JUN     | jun proto-oncogene [Source:HGNC Symbol;Acc:HGNC:6204]                                                 |
| ENSG00000177889 | UBE2N   | ubiquitin-conjugating enzyme E2N [Source:HGNC Symbol;Acc:HGNC:12492]                                  |
| ENSG00000178568 | ERBB4   | v-erb-b2 avian erythroblastic leukemia viral oncogene homolog 4 [Source:HGNC Symbol;Acc:HGNC:3432]    |
| ENSG00000178573 | MAF     | v-maf avian musculoaponeurotic fibrosarcoma oncogene homolog [Source:HGNC Symbol;Acc:HGNC:6776]       |
| ENSG00000178726 | THBD    | thrombomodulin [Source:HGNC Symbol;Acc:HGNC:11784]                                                    |
| ENSG00000178764 | ZHX2    | zinc fingers and homeoboxes 2 [Source:HGNC Symbol;Acc:HGNC:18513]                                     |
| ENSG00000179348 | GATA2   | GATA binding protein 2 [Source:HGNC Symbol;Acc:HGNC:4171]                                             |
| ENSG00000179776 | CDH5    | cadherin 5, type 2 (vascular endothelium) [Source:HGNC Symbol;Acc:HGNC:1764]                          |
| ENSG00000179914 | ITLN1   | intelectin 1 (galactofuranose binding) [Source:HGNC Symbol;Acc:HGNC:18259]                            |

|                 |           |                                                                                         |
|-----------------|-----------|-----------------------------------------------------------------------------------------|
| ENSG00000180176 | TH        | tyrosine hydroxylase [Source:HGNC<br>Symbol;Acc:HGNC:11782]                             |
| ENSG00000180210 | F2        | coagulation factor II (thrombin) [Source:HGNC<br>Symbol;Acc:HGNC:3535]                  |
| ENSG00000180817 | PPA1      | pyrophosphatase (inorganic) 1 [Source:HGNC<br>Symbol;Acc:HGNC:9226]                     |
| ENSG00000181019 | NQO1      | NAD(P)H dehydrogenase, quinone 1 [Source:HGNC<br>Symbol;Acc:HGNC:2874]                  |
| ENSG00000181026 | AEN       | apoptosis enhancing nuclease [Source:HGNC<br>Symbol;Acc:HGNC:25722]                     |
| ENSG00000182054 | IDH2      | isocitrate dehydrogenase 2 (NADP+), mitochondrial<br>[Source:HGNC Symbol;Acc:HGNC:5383] |
| ENSG00000182866 | LCK       | LCK proto-oncogene, Src family tyrosine kinase<br>[Source:HGNC Symbol;Acc:HGNC:6524]    |
| ENSG00000182985 | CADM1     | cell adhesion molecule 1 [Source:HGNC<br>Symbol;Acc:HGNC:5951]                          |
| ENSG00000183734 | ASCL2     | achaete-scute family bHLH transcription factor 2<br>[Source:HGNC Symbol;Acc:HGNC:739]   |
| ENSG00000183765 | CHEK2     | checkpoint kinase 2 [Source:HGNC<br>Symbol;Acc:HGNC:16627]                              |
| ENSG00000184144 | CNTN2     | contactin 2 (axonal) [Source:HGNC Symbol;Acc:HGNC:2172]                                 |
| ENSG00000184216 | IRAK1     | interleukin-1 receptor-associated kinase 1 [Source:HGNC<br>Symbol;Acc:HGNC:6112]        |
| ENSG00000184557 | SOCS3     | suppressor of cytokine signaling 3 [Source:HGNC<br>Symbol;Acc:HGNC:19391]               |
| ENSG00000184678 | HIST2H2BE | histone cluster 2, H2be [Source:HGNC<br>Symbol;Acc:HGNC:4760]                           |
| ENSG00000184895 | SRY       | sex determining region Y [Source:HGNC<br>Symbol;Acc:HGNC:11311]                         |
| ENSG00000184900 | SUMO3     | small ubiquitin-like modifier 3 [Source:HGNC<br>Symbol;Acc:HGNC:11124]                  |
| ENSG00000185010 | F8        | coagulation factor VIII, procoagulant component<br>[Source:HGNC Symbol;Acc:HGNC:3546]   |
| ENSG00000185303 | SFTPA2    | surfactant protein A2 [Source:HGNC<br>Symbol;Acc:HGNC:10799]                            |
| ENSG00000185345 | PARK2     | parkin RBR E3 ubiquitin protein ligase [Source:HGNC<br>Symbol;Acc:HGNC:8607]            |
| ENSG00000185532 | PRKG1     | protein kinase, cGMP-dependent, type I [Source:HGNC<br>Symbol;Acc:HGNC:9414]            |
| ENSG00000185591 | SP1       | Sp1 transcription factor [Source:HGNC<br>Symbol;Acc:HGNC:11205]                         |
| ENSG00000185920 | PTCH1     | patched 1 [Source:HGNC Symbol;Acc:HGNC:9585]                                            |
| ENSG00000185928 | PAGR1     | PAXIP1 associated glutamate-rich protein 1 [Source:HGNC<br>Symbol;Acc:HGNC:28707]       |

|                 |          |                                                                                                  |
|-----------------|----------|--------------------------------------------------------------------------------------------------|
| ENSG00000185960 | SHOX     | short stature homeobox [Source:HGNC Symbol;Acc:HGNC:10853]                                       |
| ENSG00000186377 | CYP4X1   | cytochrome P450, family 4, subfamily X, polypeptide 1 [Source:HGNC Symbol;Acc:HGNC:20244]        |
| ENSG00000186790 | FOXE3    | forkhead box E3 [Source:HGNC Symbol;Acc:HGNC:3808]                                               |
| ENSG00000186951 | PPARA    | peroxisome proliferator-activated receptor alpha [Source:HGNC Symbol;Acc:HGNC:9232]              |
| ENSG00000187678 | SPRY4    | sprouty homolog 4 (Drosophila) [Source:HGNC Symbol;Acc:HGNC:15533]                               |
| ENSG00000187758 | ADH1A    | alcohol dehydrogenase 1A (class I), alpha polypeptide [Source:HGNC Symbol;Acc:HGNC:249]          |
| ENSG00000187837 | HIST1H1C | histone cluster 1, H1c [Source:HGNC Symbol;Acc:HGNC:4716]                                        |
| ENSG00000187840 | EIF4EBP1 | eukaryotic translation initiation factor 4E binding protein 1 [Source:HGNC Symbol;Acc:HGNC:3288] |
| ENSG00000188379 | IFNA2    | interferon, alpha 2 [Source:HGNC Symbol;Acc:HGNC:5423]                                           |
| ENSG00000188486 | H2AFX    | H2A histone family, member X [Source:HGNC Symbol;Acc:HGNC:4739]                                  |
| ENSG00000196139 | AKR1C3   | aldo-keto reductase family 1, member C3 [Source:HGNC Symbol;Acc:HGNC:386]                        |
| ENSG00000196230 | TUBB     | tubulin, beta class I [Source:HGNC Symbol;Acc:HGNC:20778]                                        |
| ENSG00000196305 | IARS     | isoleucyl-tRNA synthetase [Source:HGNC Symbol;Acc:HGNC:5330]                                     |
| ENSG00000196405 | EVL      | Enah/Vasp-like [Source:HGNC Symbol;Acc:HGNC:20234]                                               |
| ENSG00000196611 | MMP1     | matrix metalloproteinase 1 (interstitial collagenase) [Source:HGNC Symbol;Acc:HGNC:7155]         |
| ENSG00000196712 | NF1      | neurofibromin 1 [Source:HGNC Symbol;Acc:HGNC:7765]                                               |
| ENSG00000197061 | HIST1H4C | histone cluster 1, H4c [Source:HGNC Symbol;Acc:HGNC:4787]                                        |
| ENSG00000197081 | IGF2R    | insulin-like growth factor 2 receptor [Source:HGNC Symbol;Acc:HGNC:5467]                         |
| ENSG00000197122 | SRC      | SRC proto-oncogene, non-receptor tyrosine kinase [Source:HGNC Symbol;Acc:HGNC:11283]             |
| ENSG00000197238 | HIST1H4J | histone cluster 1, H4j [Source:HGNC Symbol;Acc:HGNC:4785]                                        |
| ENSG00000197299 | BLM      | Bloom syndrome, RecQ helicase-like [Source:HGNC Symbol;Acc:HGNC:1058]                            |
| ENSG00000197408 | CYP2B6   | cytochrome P450, family 2, subfamily B, polypeptide 6 [Source:HGNC Symbol;Acc:HGNC:2615]         |
| ENSG00000197561 | ELANE    | elastase, neutrophil expressed [Source:HGNC Symbol;Acc:HGNC:3309]                                |
| ENSG00000197837 | HIST4H4  | histone cluster 4, H4 [Source:HGNC Symbol;Acc:HGNC:20510]                                        |
| ENSG00000197971 | MBP      | myelin basic protein [Source:HGNC Symbol;Acc:HGNC:6925]                                          |

|                 |        |                                                                                                                 |
|-----------------|--------|-----------------------------------------------------------------------------------------------------------------|
| ENSG00000198668 | CALM1  | calmodulin 1 (phosphorylase kinase, delta) [Source:HGNC Symbol;Acc:HGNC:1442]                                   |
| ENSG00000198719 | DLL1   | delta-like 1 (Drosophila) [Source:HGNC Symbol;Acc:HGNC:2908]                                                    |
| ENSG00000198793 | MTOR   | mechanistic target of rapamycin (serine/threonine kinase) [Source:HGNC Symbol;Acc:HGNC:3942]                    |
| ENSG00000198900 | TOP1   | topoisomerase (DNA) I [Source:HGNC Symbol;Acc:HGNC:11986]                                                       |
| ENSG00000203782 | LOR    | loricrin [Source:HGNC Symbol;Acc:HGNC:6663]                                                                     |
| ENSG00000203857 | HSD3B1 | hydroxy-delta-5-steroid dehydrogenase, 3 beta- and steroid delta-isomerase 1 [Source:HGNC Symbol;Acc:HGNC:5217] |
| ENSG00000204941 | PSG5   | pregnancy specific beta-1-glycoprotein 5 [Source:HGNC Symbol;Acc:HGNC:9522]                                     |
| ENSG00000213281 | NRAS   | neuroblastoma RAS viral (v-ras) oncogene homolog [Source:HGNC Symbol;Acc:HGNC:7989]                             |
| ENSG00000213741 | RPS29  | ribosomal protein S29 [Source:HGNC Symbol;Acc:HGNC:10419]                                                       |
| ENSG00000214274 | ANG    | angiogenin, ribonuclease, RNase A family, 5 [Source:HGNC Symbol;Acc:HGNC:483]                                   |
| ENSG00000215021 | PHB2   | prohibitin 2 [Source:HGNC Symbol;Acc:HGNC:30306]                                                                |
| ENSG00000224156 | TUBB   | tubulin, beta class I [Source:HGNC Symbol;Acc:HGNC:20778]                                                       |
| ENSG00000224586 | GPX5   | glutathione peroxidase 5 [Source:HGNC Symbol;Acc:HGNC:4557]                                                     |
| ENSG00000224740 | FLOT1  | flotillin 1 [Source:HGNC Symbol;Acc:HGNC:3757]                                                                  |
| ENSG00000228321 | TNF    | tumor necrosis factor [Source:HGNC Symbol;Acc:HGNC:11892]                                                       |
| ENSG00000228978 | TNF    | tumor necrosis factor [Source:HGNC Symbol;Acc:HGNC:11892]                                                       |
| ENSG00000232280 | FLOT1  | flotillin 1 [Source:HGNC Symbol;Acc:HGNC:3757]                                                                  |
| ENSG00000232575 | TUBB   | tubulin, beta class I [Source:HGNC Symbol;Acc:HGNC:20778]                                                       |
| ENSG00000232810 | TNF    | tumor necrosis factor [Source:HGNC Symbol;Acc:HGNC:11892]                                                       |
| ENSG00000233276 | GPX1   | glutathione peroxidase 1 [Source:HGNC Symbol;Acc:HGNC:4553]                                                     |
| ENSG00000233608 | TWIST2 | twist family bHLH transcription factor 2 [Source:HGNC Symbol;Acc:HGNC:20670]                                    |
| ENSG00000234745 | HLA-B  | major histocompatibility complex, class I, B [Source:HGNC Symbol;Acc:HGNC:4932]                                 |
| ENSG00000235067 | TUBB   | tubulin, beta class I [Source:HGNC Symbol;Acc:HGNC:20778]                                                       |
| ENSG00000242252 | BGLAP  | bone gamma-carboxyglutamate (gla) protein [Source:HGNC Symbol;Acc:HGNC:1043]                                    |
| ENSG00000242950 | ERVW-1 | endogenous retrovirus group W, member 1 [Source:HGNC Symbol;Acc:HGNC:13525]                                     |
| ENSG00000243955 | GSTA1  | glutathione S-transferase alpha 1 [Source:HGNC                                                                  |

|                 |          |                                                                                                                          |
|-----------------|----------|--------------------------------------------------------------------------------------------------------------------------|
| ENSG00000244067 | GSTA2    | Symbol;Acc:HGNC:4626]<br>glutathione S-transferase alpha 2 [Source:HGNC<br>Symbol;Acc:HGNC:4627]                         |
| ENSG00000244482 | LILRA6   | leukocyte immunoglobulin-like receptor, subfamily A (with TM<br>domain), member 6 [Source:HGNC<br>Symbol;Acc:HGNC:15495] |
| ENSG00000244734 | HBB      | hemoglobin, beta [Source:HGNC Symbol;Acc:HGNC:4827]                                                                      |
| ENSG00000255974 | CYP2A6   | cytochrome P450, family 2, subfamily A, polypeptide 6<br>[Source:HGNC Symbol;Acc:HGNC:2610]                              |
| ENSG00000256269 | HMBS     | hydroxymethylbilane synthase [Source:HGNC<br>Symbol;Acc:HGNC:4982]                                                       |
| ENSG00000261857 | MIA      | melanoma inhibitory activity [Source:HGNC<br>Symbol;Acc:HGNC:7076]                                                       |
| ENSG00000278705 | HIST1H4B | histone cluster 1, H4b [Source:HGNC<br>Symbol;Acc:HGNC:4789]                                                             |

---
